# Supplementary material for: Alkali metal salts-assisted coupling reaction between fluorinated benzyl electrophiles and alkenylboronic acids
Source: Royal Society of Chemistry journal article supplement (doi:10.1039/d2nj04156a), 2022-01-01
Supplement: d2nj04156a1.pdf [file d2nj04156a1.pdf]

# Alkali Metal Salts-Assisted Coupling Reaction between Fluorinated Benzyl Electrophiles and Alkenylboronic Acids

Wenna Xie\*<sup>a</sup>, Shiwen Liu<sup>b</sup>, Gerald B. Hammond<sup>c</sup>, Bo Xu<sup>d</sup>

<sup>a</sup> College of pharmacy, Jiangsu Vocational College of Medicine, Yancheng, 224005, China.

<sup>b</sup> College of Textiles and Clothing, Yancheng Institute of Technology, Jiangsu, 224003, China.

<sup>c</sup> Department of Chemistry, University of Louisville, Louisville, Kentucky 40292, United States.

<sup>d</sup> College of Chemistry, Chemical Engineering and Biotechnology, Donghua University, 2999 North Renmin Lu, Shanghai 201620, China.

## Content

|                                                                                                  |     |
|--------------------------------------------------------------------------------------------------|-----|
| 1. General.....                                                                                  | 2   |
| 2. Preparation of $\alpha$ -trifluoromethyl benzyl triflates .....                               | 3   |
| 3. Preparation of alkenylboronic acids .....                                                     | 4   |
| 4. General procedure for reaction of $\alpha$ -trifluoromethyl benzyl triflates .....            | 4   |
| 5. General procedure for reaction of $\alpha$ -monofluoromethyl benzyl methanesulfonates .....   | 14  |
| 6. Investigation of the metal contamination using coupled plasma mass spectroscopy (ICP-MS)..... | 18  |
| 7. Copies of NMR Spectra.....                                                                    | 19  |
| 8. References .....                                                                              | 133 |

## 1. General

Commercial reagents and solvents were obtained from the commercial providers and used without further purification. The products were purified using a commercial flash chromatography system or a regular glass column. TLC was developed on silica gel 60 F254 glass plates.  $^1\text{H}$  NMR (400 MHz) and  $^{13}\text{C}$  NMR (100 MHz) spectra were recorded on a Bruker NMR apparatus. The chemical shifts are reported in  $\delta$  (ppm) values ( $^1\text{H}$  and  $^{13}\text{C}$  NMR relative to  $\text{CHCl}_3$ ,  $\delta$  7.26 ppm for  $^1\text{H}$  NMR and  $\delta$  77.0 ppm for  $^{13}\text{C}$  NMR). Or alternatively,  $^1\text{H}$  NMR chemical shifts were referenced to tetramethylsilane signal (0 ppm). Multiplicities are recorded by s (singlet), d (doublet), t (triplet), q (quartet), p (pentet), h (hexet), m (multiplet) and br (broad). Coupling constants ( $J$ ), are reported in Hertz (Hz). HRMS data were obtained by using Thermo LTQ-Orbitrap XL mass spectrometer with ESI, ACPI or EI ionization sources by the service provided at Indiana University Bloomington Mass Spectral Facility. GC analyses were performed using a Shimadzu GC-2010 ultra gas chromatography–mass spectrometry instrument equipped with a Shimadzu AOC-20s autosampler.

## 2. Preparation of $\alpha$ -trifluoromethyl benzyl triflates

All  $\alpha$ -trifluoromethyl benzyl triflates were prepared according to literature methods.<sup>1</sup>

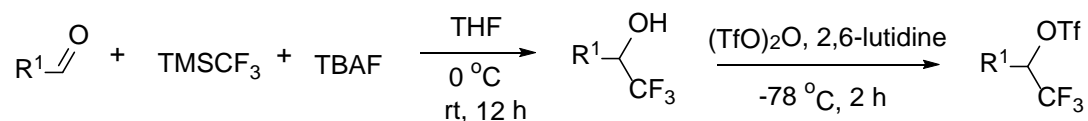

TBAF $\cdot$ 3H<sub>2</sub>O (0.6 mmol, 0.12 equiv) was added portion-wise to a solution of TMSCF<sub>3</sub> (6.0 mmol, 1.2 equiv) and the aldehyde (5.0 mmol, 1.0 equiv) in THF (5.0 mL) at 0 °C. The resultant dark solution was warmed to rt and stirred for 16 h, then satd. aq. NH<sub>4</sub>Cl (5.0 mL) was added. THF was removed in vacuo, the aqueous layer was extracted with MTBE (3  $\times$  10.0 mL) and the combined organic extracts were washed sequentially with H<sub>2</sub>O (10.0 mL) and brine (10.0 mL) then dried over Na<sub>2</sub>SO<sub>4</sub> and concentrated in vacuo. The residue was dissolved in THF (5.0 mL) after which aq 1.0 M HCl (5.0 mL) was added. The reaction mixture was stirred for 8 h before being extracted with EtOAc (3  $\times$  15.0 mL). The organic layers were combined, washed with brine (10.0 mL), dried over Na<sub>2</sub>SO<sub>4</sub> and concentrated in vacuo. The residue was purified by flash silica gel column chromatography (hexanes: EtOAc = 5:1) to give the trifluoromethyl benzylic alcohols. Then, a flame-dried flask was flushed with nitrogen and charged with trifluoromethyl benzylic alcohol (2.0 mmol, 1.0 equiv). Then dry CH<sub>2</sub>Cl<sub>2</sub> (5.0 mL) was added, and the mixture was cooled to -78 °C before adding 2, 6-lutidine (0.37 mL, 3.2 mmol, 1.6 equiv). Under stirring, triflic anhydride (0.45 mL, 2.4 mmol, 1.2 equiv) was added dropwise over five minutes, and then the reaction mixture was stirred for another 15 min at -78 °C. Then 0.5 M H<sub>2</sub>SO<sub>4</sub> aqueous solution (20.0 mL) and hexanes (15.0 mL) were added. The flask was removed from the cold bath, and the reaction mixture was transferred to a separatory funnel, and the aqueous mixture was extracted of CH<sub>2</sub>Cl<sub>2</sub> (15.0 mL  $\times$  5). The organic layers were combined and dried over Na<sub>2</sub>SO<sub>4</sub>, filtered, and the excess solvents were removed under vacuum, resulting in a clear, yellow liquid residue. This residue was then purified by silica gel column chromatography with 10% EtOAc in petroleum ether.

Two representative  $\alpha$ -trifluoromethyl benzyl triflates were synthesized with characterization data.

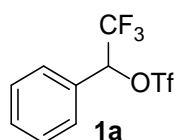

**2, 2, 2-trifluoro-1-phenylethyl trifluoromethanesulfonate (1a).** Following the standard procedure, the desired product was obtained after flash chromatography (PE:EA = 10% as eluent) as colorless oil (0.55 g, 90 %). <sup>1</sup>H NMR (400 MHz, chloroform-d)  $\delta$  7.57 – 7.42 (m, 5H), 5.90 (q,  $J$  = 5.9 Hz, 1H). <sup>19</sup>F NMR (376 MHz, chloroform-d)  $\delta$  -75.07, -76.62 (d,  $J$  = 6.1 Hz). <sup>13</sup>C NMR (100 MHz, chloroform-d)  $\delta$  131.4, 129.1, 128.1, 127.9, 121.5 (q,  $J$  = 280 Hz), 118.2 (q,  $J$  = 318 Hz), 82.6 (q,  $J$  = 36 Hz). HRMS (EI)  $m/z$ : [M]<sup>+</sup> Calcd for C<sub>9</sub>H<sub>6</sub>F<sub>6</sub>O<sub>3</sub>S 307.9942, found 307.9947.

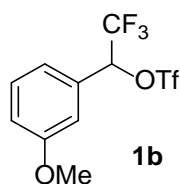

**2, 2, 2-trifluoro-1-(3-methoxyphenyl)ethyl trifluoromethanesulfonate (1b).** Following the standard procedure, the desired product was obtained after flash chromatography (PE:EA = 10% as eluent) as colorless oil (0.58 g, 86 %). <sup>1</sup>H NMR (400 MHz, chloroform-d)  $\delta$  7.41-7.35 (m, 1H), 7.10 – 6.97 (m, 3H), 5.83 (q,  $J$  = 5.9 Hz, 1H), 3.82 (s, 3H). <sup>19</sup>F NMR (376 MHz, chloroform-d)  $\delta$  -74.85, -76.35 (d,  $J$  = 5.7 Hz). <sup>13</sup>C NMR (100 MHz, chloroform-d)  $\delta$  160.00, 130.27, 129.25, 121.41(q,  $J$  = 279 Hz), 120.10, 118.31(q,  $J$  = 318 Hz), 116.89, 113.37, 82.44 (q,  $J$  = 35 Hz), 55.26. HRMS (EI)  $m/z$ : [M]<sup>+</sup> Calcd for C<sub>10</sub>H<sub>8</sub>F<sub>6</sub>O<sub>4</sub>S 338.0047, found 338.0040.

### 3. Preparation of alkenylboronic acids

All alkenylboronic acids were prepared according to a literature method.<sup>3</sup>

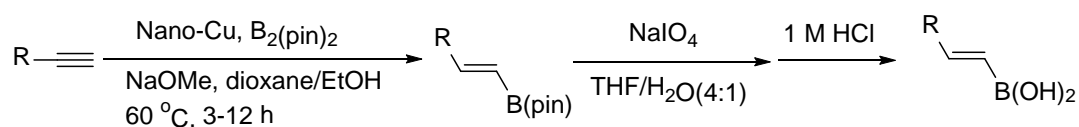

An oven-dried vial was charged with Nano-Cu (0.064 g, 1.0 mmol, 0.2 equiv), MeONa (0.052 g, 1.0 mmol, 1.0 equiv) and bis(pinacolato)diboron (1.9 g, 7.5 mmol, 1.5 equiv). After being sealed with a septum, the vial was connected to an argon-vacuum line and was evacuated and backfilled with argon (x 3). Dioxane (10.0 mL) and EtOH (5.0 mL) were added and the mixture was stirred for 30 min. Then alkyne (5.0 mmol, 1.0 equiv) was added. The mixture was stirred at 60 °C for 3 - 12 h. This was followed by the addition of water; the aqueous phase was then extracted with ethyl acetate (3 x 10.0 mL). The combined organic layers were dried over Na<sub>2</sub>SO<sub>4</sub> and concentrated. The crude product was purified by silica gel column chromatography. Alkenylboranes (2.0 mmol) and sodium periodate (1.3 g, 6.0 mmol, 3.0 equiv) were stirred in a 4:1 mixture of THF and H<sub>2</sub>O (10.0 mL) for 30 min, at which time aqueous hydrochloric acid (1 N, 1.4 mL) was added to the suspension, and the reaction mixture was stirred at room temperature for 2 - 10 h. The reaction mixture was diluted with water and extracted with EtOAc (3 x 10.0 mL). The combined organic layers were washed with brine, dried over Na<sub>2</sub>SO<sub>4</sub> and concentrated in vacuo to yield the desired boronic acid. The obtained boronic acid was used without further purification.

### 4. General procedure for reaction of $\alpha$ -trifluoromethyl benzyl triflates

An oven-dried vial was charged with  $\alpha$ -trifluoromethyl benzyl triflate **1** (0.2 mmol), alkenylboronic acid **2** (0.30 mmol, 1.5 equiv), K<sub>3</sub>PO<sub>4</sub> (0.4 mmol, 0.084g, 2.0 equiv). DCE (1.5 mL) was added and the mixture was stirred at 80 °C for 12 h under air. After that, water were added and the aqueous phase was extracted with ethyl acetate (3 x 5.0 mL). The combined organic layers were dried over Na<sub>2</sub>SO<sub>4</sub> and then concentrated. The crude product was purified by silica gel column chromatography to give product **3**.

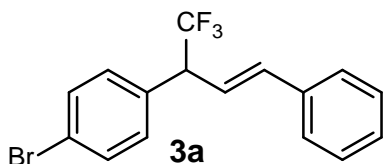

**(E)-1-bromo-4-(1,1,1-trifluoro-4-phenylbut-3-en-2-yl)benzene (3a).** Following the standard procedure, the desired product was obtained after flash chromatography (PE as eluent) as colorless oil (49 mg, 73 %).  $^1\text{H}$  NMR (400 MHz, chloroform- $d$ )  $\delta$  7.57 – 7.46 (m, 2H), 7.41 – 7.35 (m, 2H), 7.35 – 7.29 (m, 2H), 7.31-7.25 (m, 3H), 6.56 (d,  $J$  = 15.9 Hz, 1H), 6.39 (dd,  $J$  = 15.9, 7.9 Hz, 1H), 4.11 (p,  $J$  = 8.9 Hz, 1H).  $^{19}\text{F}$  NMR (376 MHz, chloroform- $d$ )  $\delta$  -69.00 (d,  $J$  = 9.6 Hz).  $^{13}\text{C}$  NMR (100 MHz, chloroform- $d$ )  $\delta$  135.89, 133.67, 131.99, 130.65, 128.64, 128.31, 126.53, 125.70 (q,  $J$  = 279 Hz), 122.43, 121.90, 52.83 (q,  $J$  = 27 Hz). HRMS (EI)  $m/z$ :  $[\text{M}]^+$  Calcd for  $\text{C}_{16}\text{H}_{12}\text{BrF}_3$  340.0074, found 340.0070.

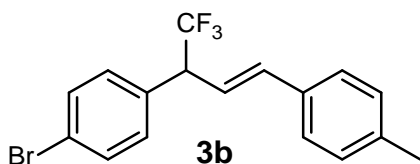

**(E)-1-bromo-4-(1,1,1-trifluoro-4-(p-tolyl)but-3-en-2-yl)benzene (3b).** Following the standard procedure, the desired product was obtained after flash chromatography (PE as eluent) as colorless oil (56 mg, 80 %).  $^1\text{H}$  NMR (400 MHz, chloroform- $d$ )  $\delta$  7.50 (d,  $J$  = 8.3 Hz, 2H), 7.29 – 7.21 (m, 4H), 7.12 (d,  $J$  = 7.9 Hz, 2H), 6.52 (d,  $J$  = 15.8 Hz, 1H), 6.33 (dd,  $J$  = 15.8, 7.9 Hz, 1H), 4.09 (p,  $J$  = 9.0 Hz, 1H), 2.33 (s, 3H).  $^{19}\text{F}$  NMR (376 MHz, chloroform- $d$ )  $\delta$  -69.05 (d,  $J$  = 9.4 Hz).  $^{13}\text{C}$  NMR (100 MHz, chloroform- $d$ )  $\delta$  138.15, 135.63, 133.72, 133.02, 131.82, 130.53, 129.20, 126.31, 125.62 (q,  $J$  = 279 Hz), 122.25, 120.71, 52.71 (q,  $J$  = 29 Hz), 21.10. HRMS (EI)  $m/z$ :  $[\text{M}]^+$  Calcd for  $\text{C}_{17}\text{H}_{14}\text{BrF}_3$  354.0321, found 354.0329.

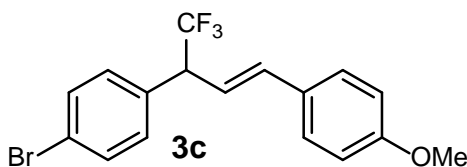

**(E)-1-bromo-4-(1,1,1-trifluoro-4-(4-methoxyphenyl)but-3-en-2-yl)benzene (3c).** Following the standard procedure, the desired product was obtained after flash chromatography (PE as eluent) as colorless oil (59 mg, 80 %).  $^1\text{H}$  NMR (400 MHz, chloroform- $d$ )  $\delta$  7.50 (d,  $J$  = 8.5 Hz, 2H), 7.30 (d,  $J$  = 8.8 Hz, 2H), 7.24 (d,  $J$  = 8.3 Hz, 2H), 6.84 (d,  $J$  = 8.7 Hz, 2H), 6.49 (d,  $J$  = 15.8 Hz, 1H), 6.24 (dd,  $J$  = 15.8, 8.0 Hz, 1H), 4.07 (p,  $J$  = 8.9 Hz, 1H), 3.79 (s, 3H).  $^{19}\text{F}$  NMR (376 MHz, chloroform- $d$ )  $\delta$  -69.08 (d,  $J$  = 9.1 Hz).  $^{13}\text{C}$  NMR (100 MHz, chloroform- $d$ )  $\delta$  159.65, 135.20, 133.86, 131.85, 130.58, 128.59, 127.73, 125.70 (q,  $J$  = 278 Hz), 122.25, 119.52, 113.94, 55.18,

52.78 (q,  $J = 27$  Hz). HRMS (EI)  $m/z$ :  $[M]^+$  Calcd for  $C_{17}H_{14}BrF_3O$  370.0180, found 354.0188.

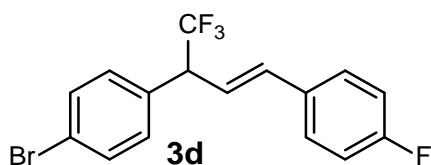

**(E)-1-bromo-4-(1,1,1-trifluoro-4-(4-fluorophenyl)but-3-en-2-yl)benzene (3d).** Following the standard procedure, the desired product was obtained after flash chromatography (PE as eluent) as colorless oil (59 mg, 83 %).  $^1H$  NMR (400 MHz, chloroform- $d$ )  $\delta$  7.50 (d,  $J = 8.4$  Hz, 2H), 7.39-7.28 (m, 2H), 7.23 (d,  $J = 8.3$  Hz, 2H), 7.02-6.97 (m, 2H), 6.51 (d,  $J = 15.8$  Hz, 1H), 6.29 (dd,  $J = 15.8, 7.9$  Hz, 1H), 4.08 (p,  $J = 8.9$  Hz, 1H).  $^{19}F$  NMR (376 MHz, chloroform- $d$ )  $\delta$  -69.02 (d,  $J = 9.3$  Hz), -113.19 (m, -113.15 - -113.23).  $^{13}C$  NMR (100 MHz, chloroform- $d$ )  $\delta$  162.52 (d,  $J = 247$  Hz), 134.54, 133.39, 131.85, 131.34, 130.45, 128.00, 125.50 (q,  $J = 278$  Hz), 122.32, 121.53, 115.43 (d,  $J = 21$  Hz), 52.63 (q,  $J = 28$  Hz). HRMS (EI)  $m/z$ :  $[M]^+$  Calcd for  $C_{16}H_{11}BrF_4$  357.9980, found 357.9985.

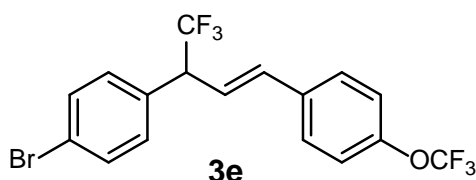

**(E)-1-bromo-4-(1,1,1-trifluoro-4-(4-(trifluoromethoxy)phenyl)but-3-en-2-yl)benzene (3e).** Following the standard procedure, the desired product was obtained after flash chromatography (PE as eluent) as colorless oil (55 mg, 66 %).  $^1H$  NMR (400 MHz, chloroform- $d$ )  $\delta$  7.49 (d,  $J = 8.5$  Hz, 2H), 7.35 (d,  $J = 8.7$  Hz, 2H), 7.21 (d,  $J = 8.3$  Hz, 2H), 7.13 (d,  $J = 8.2$  Hz, 2H), 6.51 (d,  $J = 15.9$  Hz, 1H), 6.34 (dd,  $J = 15.9, 7.8$  Hz, 1H), 4.08 (p,  $J = 8.9$  Hz, 1H).  $^{19}F$  NMR (376 MHz, chloroform- $d$ )  $\delta$  -57.95, -69.03 (d,  $J = 9.0$  Hz).  $^{13}C$  NMR (100 MHz, chloroform- $d$ )  $\delta$  149.01, 134.61, 134.41, 133.36, 132.07, 130.61, 127.85, 125.60 (q,  $J = 280$  Hz), 122.57, 122.05 (q,  $J = 257$  Hz), 121.68, 121.11, 52.78 (q,  $J = 28$  Hz). HRMS (ESI)  $m/z$ :  $[M+Cl]^+$  Calcd for  $C_{17}H_{11}BrClF_6O$  458.9586, found 458.9582.

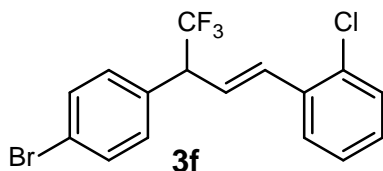

**(E)-1-(3-(4-bromophenyl)-4,4,4-trifluorobut-1-en-1-yl)-2-chlorobenzene (3f).** Following the standard procedure, the desired product was obtained after flash chromatography (PE as eluent) as colorless oil (58 mg, 78 %).  $^1H$  NMR (400 MHz, chloroform- $d$ )  $\delta$  7.53 (d,  $J = 8.2$  Hz, 3H), 7.40 - 7.32 (m, 1H), 7.30 - 7.20 (m, 4H), 6.99 (d,  $J = 15.8$  Hz,

1H), 6.38 (dd,  $J = 15.9, 8.1$  Hz, 1H), 4.18 (p,  $J = 9.0$  Hz, 1H).  $^{19}\text{F}$  NMR (376 MHz, chloroform-d)  $\delta$  -68.96 (d,  $J = 9.0$  Hz).  $^{13}\text{C}$  NMR (100 MHz, chloroform-d)  $\delta$  134.12, 133.37, 133.24, 132.30, 132.04, 132.02, 130.62, 129.74, 129.31, 126.92, 124.67, 123.22 (q,  $J = 280$  Hz), 122.54, 52.92 (q,  $J = 28$  Hz). HRMS (ESI)  $m/z$ :  $[\text{M}+\text{H}]^+$  Calcd for  $\text{C}_{16}\text{H}_{12}\text{BrClF}_3$  374.9763, found 374.9761.

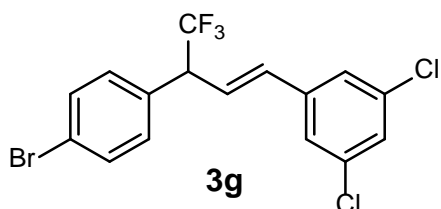

**(E)-1-(3-(4-bromophenyl)-4,4,4-trifluorobut-1-en-1-yl)-3,5-dichlorobenzene (3g).** Following the standard procedure, the desired product was obtained after flash chromatography (PE as eluent) as colorless oil (57 mg, 70 %).  $^1\text{H}$  NMR (400 MHz, chloroform-d)  $\delta$  7.32 (d,  $J = 8.4$  Hz, 2H), 7.02 (dd,  $J = 7.5, 2.7$  Hz, 5H), 6.25-6.16 (m, 2H), 3.90 (q,  $J = 8.4$  Hz, 1H).  $^{19}\text{F}$  NMR (376 MHz, chloroform-d)  $\delta$  -69.08 (d,  $J = 9.0$  Hz).  $^{13}\text{C}$  NMR (100 MHz, chloroform-d)  $\delta$  138.70, 135.19, 133.31, 132.81, 132.05, 130.52, 128.00, 125.34 (q,  $J = 286$  Hz), 124.97, 124.81, 122.66, 52.59 (q,  $J = 29$  Hz). HRMS (ESI)  $m/z$ :  $[\text{M}-\text{H}]^-$  Calcd for  $\text{C}_{16}\text{H}_9\text{BrCl}_2\text{F}_3$  406.9217, found 406.9220.

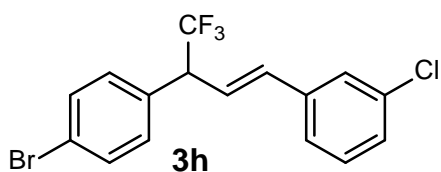

**(E)-1-(3-(4-bromophenyl)-4,4,4-trifluorobut-1-en-1-yl)-3-chlorobenzene (3h).** Following the standard procedure, the desired product was obtained after flash chromatography (PE as eluent) as colorless oil (57 mg, 77 %).  $^1\text{H}$  NMR (400 MHz, chloroform-d)  $\delta$  7.54 (d,  $J = 8.4$  Hz, 2H), 7.38 (s, 1H), 7.27 (d,  $J = 7.2$  Hz, 5H), 6.52 (d,  $J = 16.0$  Hz, 1H), 6.42 (dd,  $J = 16.0, 8.0$  Hz, 1H), 4.13 (q,  $J = 8.4$  Hz, 1H).  $^{19}\text{F}$  NMR (376 MHz, chloroform-d)  $\delta$  -69.06 (d,  $J = 9.1$  Hz).  $^{13}\text{C}$  NMR (100 MHz, chloroform-d)  $\delta$  137.50, 134.42, 134.37, 133.09, 131.88, 130.42, 129.67, 128.07, 126.23, 125.37 (q,  $J = 280$  Hz), 124.60, 123.33, 122.39, 52.55 (q,  $J = 27$  Hz). HRMS (ESI)  $m/z$ :  $[\text{M}+\text{H}]^+$  Calcd for  $\text{C}_{16}\text{H}_{12}\text{BrClF}_3$  374.9592, found 374.9596.

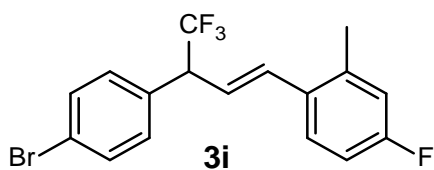

**(E)-1-(3-(4-bromophenyl)-4,4,4-trifluorobut-1-en-1-yl)-4-fluoro-2-methylbenzene (3i).** Following the standard procedure, the desired product was obtained after flash chromatography (PE as eluent) as colorless oil (53 mg, 72 %). <sup>1</sup>H NMR (400 MHz, chloroform-d) δ 7.64 (d, *J* = 8.5 Hz, 2H), 7.37 (d, *J* = 8.4 Hz, 2H), 7.32 (dd, *J* = 7.3, 2.2 Hz, 1H), 7.29 - 7.25 (m, 1H), 7.09-7.05 (m, 1H), 6.61 (d, *J* = 15.9 Hz, 1H), 6.41 (dd, *J* = 15.9, 7.9 Hz, 1H), 4.21 (p, *J* = 8.8 Hz, 1H), 2.38 (s, 3H). <sup>19</sup>F NMR (376 MHz, chloroform-d) δ -68.89 (d, *J* = 9.0 Hz), -117.26 - -117.33 (m). <sup>13</sup>C NMR (100 MHz, chloroform-d) δ 161.42(d, *J* = 246 Hz), 135.05, 133.80, 132.15, 130.76, 129.62 (d, *J* = 5 Hz), 125.70 (d, *J* = 8 Hz), 125.84 (q, *J* = 280 Hz). 125.32, 125.14, 122.58, 121.46, 115.34(d, *J* = 22 Hz), 52.95 (q, *J* = 28 Hz), 14.63. HRMS (ESI) *m/z*: [M-H]<sup>-</sup> Calcd for C<sub>17</sub>H<sub>12</sub>BrF<sub>4</sub> 371.0059, found 371.0068.

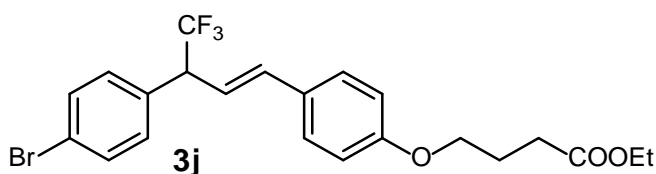

**Ethyl (E)-4-(4-(3-(4-bromophenyl)-4,4,4-trifluorobut-1-en-1-yl)phenoxy)butanoate (3j)** Following the standard procedure, the desired product was obtained after flash chromatography (PE/EA = 0-5% as eluent) as colorless oil (65 mg, 69 %). <sup>1</sup>H NMR (400 MHz, chloroform-d) δ 7.48 (d, *J* = 8.4 Hz, 2H), 7.30 – 7.18 (m, 4H), 6.80 (d, *J* = 8.7 Hz, 2H), 6.46 (d, *J* = 15.8 Hz, 1H), 6.21 (dd, *J* = 15.8, 8.0 Hz, 1H), 4.11 (q, *J* = 7.1 Hz, 2H), 4.08 – 4.00 (m, 1H), 3.97 (t, *J* = 6.1 Hz, 2H), 2.47 (t, *J* = 7.3 Hz, 2H), 2.07 (p, *J* = 6.7 Hz, 2H), 1.22 (t, *J* = 7.1 Hz, 3H). <sup>19</sup>F NMR (376 MHz, chloroform-d) δ -69.13 (d, *J* = 9.2 Hz). <sup>13</sup>C NMR (100 MHz, chloroform-d) δ 173.28, 159.12, 135.43, 134.07, 132.08, 130.78, 128.86, 127.92, 125.91 (q, *J* = 279 Hz) 122.46, 119.76, 114.73, 66.92, 60.59, 52.71 (q, *J* = 27 Hz), 30.88, 24.71, 14.35. HRMS (ESI) *m/z*: [M+H]<sup>+</sup> Calcd for C<sub>22</sub>H<sub>23</sub>BrF<sub>3</sub>O<sub>3</sub> 471.0783, found 471.0782.

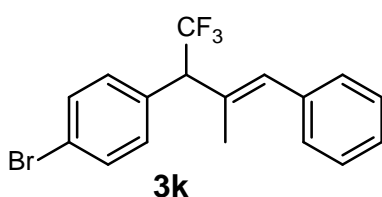

**(E)-1-bromo-4-(1,1,1-trifluoro-3-methyl-4-phenylbut-3-en-2-yl)benzene (3k).** Following the standard procedure, the desired product was obtained after flash chromatography (PE as eluent) as colorless oil (37 mg, 53 %). <sup>1</sup>H NMR (400 MHz, chloroform-d) δ 7.58 (d, *J* = 8.5 Hz, 2H), 7.41 (dd, *J* = 8.3, 6.9 Hz, 2H), 7.37 – 7.29 (m, 5H), 6.75 (s, 1H), 4.18 (q, *J* = 9.8 Hz, 1H), 1.87 (s, 3H). <sup>19</sup>F NMR (376 MHz, chloroform-d) δ -64.92 (d, *J* = 9.9 Hz). <sup>13</sup>C NMR (100 MHz, chloroform-d) δ 136.80, 133.17, 131.76, 131.52, 131.03, 130.57, 128.94, 128.10, 126.93, 125.85 (q, *J* = 280 Hz), 122.12, 57.86 (q, *J* = 27 Hz), 16.66. HRMS (EI) *m/z*: [M]<sup>+</sup> Calcd for C<sub>17</sub>H<sub>14</sub>BrF<sub>3</sub> 354.0321, found 354.0329.



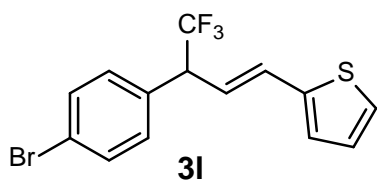

**(E)-2-(3-(4-bromophenyl)-4,4,4-trifluorobut-1-en-1-yl)thiophene (3l).** Following the standard procedure, the desired product was obtained after flash chromatography (PE as eluent) as colorless oil (52 mg, 76 %). <sup>1</sup>H NMR (400 MHz, chloroform-d) δ 7.52 (d, *J* = 8.5 Hz, 2H), 7.24 (d, *J* = 8.4 Hz, 2H), 7.22 – 7.16 (m, 1H), 7.02 – 6.93 (m, 2H), 6.66 (d, *J* = 15.7 Hz, 1H), 6.22 (dd, *J* = 15.7, 7.8 Hz, 1H), 4.08 (p, *J* = 8.9 Hz, 1H). <sup>19</sup>F NMR (376 MHz, chloroform-d) δ -68.98 (d, *J* = 9.0 Hz). <sup>13</sup>C NMR (100 MHz, chloroform-d) δ 140.74, 133.39, 132.04, 130.69, 128.88, 127.45, 126.76, 125.58 (q, *J* = 279 Hz), 125.15, 122.52, 121.19, 52.66 (q, *J* = 28 Hz). HRMS (EI) *m/z*: [M]<sup>+</sup> Calcd for C<sub>14</sub>H<sub>10</sub>BrF<sub>3</sub>S 345.9639, found 345.9633.

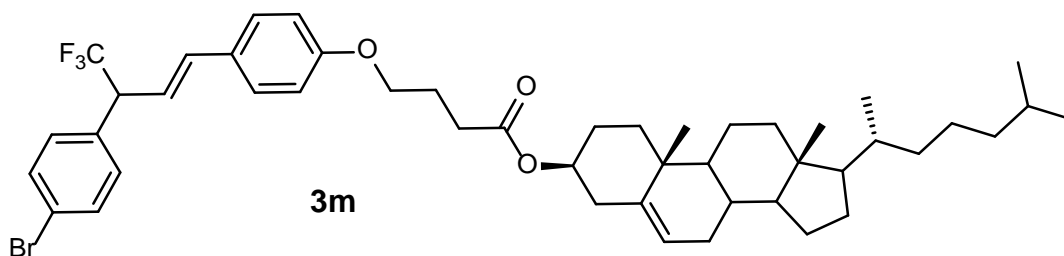

**(3S,10R,13R)-10,13-dimethyl-17-((R)-6-methylheptan-2-yl)-2,3,4,7,8,9,10,11,12,13,14,15,16,17-tetradecahydro-1H-cyclopenta[a]phenanthren-3-yl-4-(4-((E)-3-(4-bromophenyl)-4,4,4-trifluorobut-1-en-1-yl)phenoxy)butanoate (3o).** Following the standard procedure, the desired product was obtained after flash chromatography (PE/EA = 0-10% as eluent) as colorless oil (71 mg, 44 %). <sup>1</sup>H NMR (400 MHz, chloroform-d) δ 7.58 (d, *J* = 8.4 Hz, 2H), 7.41 – 7.26 (m, 4H), 6.90 (d, *J* = 8.7 Hz, 2H), 6.56 (d, *J* = 15.9 Hz, 1H), 6.31 (dd, *J* = 15.8, 8.0 Hz, 1H), 5.43 (d, *J* = 4.1 Hz, 1H), 4.74 – 4.66 (m, 1H), 4.15 (dt, *J* = 17.6, 8.8 Hz, 1H), 4.07 (t, *J* = 6.1 Hz, 2H), 2.55 (t, *J* = 7.2 Hz, 2H), 2.37 (d, *J* = 7.7 Hz, 2H), 2.22-2.14 (m, 2H), 2.10 – 2.00 (m, 2H), 1.97 – 1.86 (m, 3H), 1.71 – 1.09 (m, 20H), 1.08 (s, 3H), 1.05 – 1.02 (m, 1H), 0.98 (d, *J* = 6.5 Hz, 3H), 0.94 (d, *J* = 6.6 Hz, 6H), 0.74 (s, 3H). <sup>19</sup>F NMR (376 MHz, chloroform-d) δ -69.01 (d, *J* = 9.2 Hz). <sup>13</sup>C NMR (100 MHz, chloroform-d) δ 172.32, 158.83, 139.41, 135.12, 133.77, 131.76, 130.46, 129.93, 128.54, 127.60, 125.61 (q, *J* = 278 Hz), 122.48, 119.44, 114.44, 73.91, 66.66, 60.18, 56.49, 55.95, 52.68, 125.74 (q, *J* = 27 Hz), 49.83, 42.12, 39.54, 39.33, 37.95, 36.78, 36.39, 35.99, 35.59, 31.70, 30.91, 30.69, 28.03, 27.81, 27.61, 24.47, 24.09, 23.64, 22.61, 22.36, 20.84, 19.11, 18.52, 14.00, 11.66. HRMS (ESI) *m/z*: [M+Cl]<sup>+</sup> Calcd for C<sub>47</sub>H<sub>62</sub>BrClF<sub>3</sub>O<sub>3</sub> 845.3528, found 845.3536.

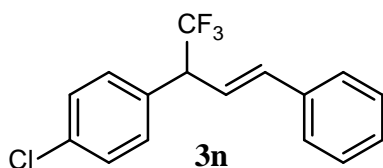

**(E)-1-chloro-4-(1,1,1-trifluoro-4-phenylbut-3-en-2-yl)benzene (3n).** Following the standard procedure, the desired product was obtained after flash chromatography (PE as eluent) as colorless oil (43 mg, 73 %). <sup>1</sup>H NMR (400 MHz, chloroform-d)  $\delta$  7.41 – 7.24 (m, 9H), 6.57 (d,  $J$  = 15.9 Hz, 1H), 6.40 (dd,  $J$  = 15.9, 7.9 Hz, 1H), 4.13 (p,  $J$  = 8.9 Hz, 1H). <sup>19</sup>F NMR (376 MHz, chloroform-d)  $\delta$  -69.02 (d,  $J$  = 9.0 Hz). <sup>13</sup>C NMR (100 MHz, chloroform-d)  $\delta$  135.85, 134.27, 133.13, 130.31, 129.01, 128.62, 128.29, 126.52, 125.75(q,  $J$  = 279 Hz), 124.36, 121.97, 52.73(q,  $J$  = 27 Hz). HRMS (EI) m/z: [M]<sup>+</sup> Calcd for C<sub>16</sub>H<sub>12</sub>ClF<sub>3</sub> 296.2235, found 296.2233.

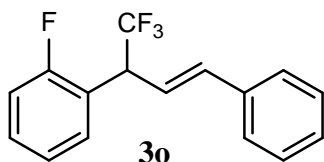

**(E)-1-fluoro-2-(1,1,1-trifluoro-4-phenylbut-3-en-2-yl)benzene (3o).** Following the standard procedure, the desired product was obtained after flash chromatography (PE as eluent) as colorless oil (35 mg, 68 %). <sup>1</sup>H NMR (400 MHz, chloroform-d)  $\delta$  7.51-7.48 (m, 1H), 7.40 (d,  $J$  = 7.1 Hz, 2H), 7.36-7.32 (m, 3H), 7.31 – 7.25 (m, 1H), 7.22-7.18 (m, 1H), 7.16-7.11 (m, 1H), 6.64 (d,  $J$  = 15.9 Hz, 1H), 6.44 (dd,  $J$  = 15.8, 8.2 Hz, 1H), 4.64 (p,  $J$  = 8.9 Hz, 1H). <sup>19</sup>F NMR (376 MHz, chloroform-d)  $\delta$  -68.92 (dd,  $J$  = 9.2, 3.9 Hz), -117.54 - -117.62 (m). <sup>13</sup>C NMR (100 MHz, chloroform-d)  $\delta$  160.53(d,  $J$  = 247 Hz), 135.93, 129.81, 129.72, 129.52, 128.51, 128.15, 126.46, 125.70(q,  $J$  = 284 Hz) 124.35(d,  $J$  = 3 Hz), 121.88(d,  $J$  = 13 Hz), 121.21, 115.70 (d,  $J$  = 23 Hz), 45.68(q,  $J$  = 28 Hz). HRMS (EI) m/z: [M]<sup>+</sup> Calcd for C<sub>16</sub>H<sub>12</sub>F<sub>4</sub> 280.0875, found 280.0877.

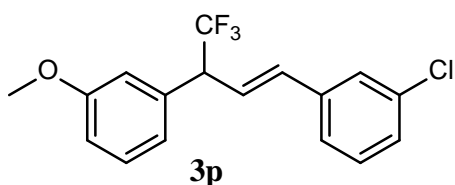

**(E)-1-chloro-3-(4,4,4-trifluoro-3-(3-methoxyphenyl)but-1-en-1-yl)benzene (3p).** Following the standard procedure, the desired product was obtained after flash chromatography (PE as eluent) as colorless oil (47 mg, 72 %). <sup>1</sup>H NMR (400 MHz, chloroform-d)  $\delta$  7.39 (s, 1H), 7.35-7.30 (m, 1H), 7.31-7.26 (m, 3H), 6.98 (d,  $J$  = 7.6 Hz, 1H), 6.95 – 6.88 (m, 2H), 6.55 (d,  $J$  = 15.9 Hz, 1H), 6.45 (dd,  $J$  = 15.9, 7.7 Hz, 1H), 4.13 (p,  $J$  = 9.1 Hz, 1H), 3.84 (s, 3H). <sup>19</sup>F NMR (376 MHz, chloroform-d)  $\delta$  -68.72 (d,  $J$  = 9.2 Hz). <sup>13</sup>C NMR (100 MHz, chloroform-d)  $\delta$  159.95, 138.06, 135.85, 134.69, 134.27, 129.99, 129.92, 128.19, 126.54, 125.96(q,  $J$  = 280 Hz), 124.90, 124.24, 121.33, 115.16, 113.50, 55.35, 53.45(q,  $J$  = 28 Hz). HRMS (ESI) m/z: [M-H]<sup>-</sup> Calcd for C<sub>17</sub>H<sub>13</sub>ClF<sub>3</sub>O 325.9977, found 324.9973.

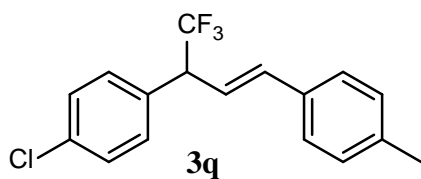

**(E)-1-chloro-4-(1,1,1-trifluoro-4-(p-tolyl)but-3-en-2-yl)benzene (3q).** Following the standard procedure, the desired product was obtained after flash chromatography (PE as eluent) as colorless oil (49 mg, 83 %).  $^1\text{H}$  NMR (400 MHz, chloroform-d)  $\delta$  7.37 – 7.23 (m, 6H), 7.12 (d,  $J$  = 7.9 Hz, 2H), 6.52 (d,  $J$  = 15.9 Hz, 1H), 6.33 (dd,  $J$  = 15.9, 7.9 Hz, 1H), 4.10 (p,  $J$  = 9.0 Hz, 1H), 2.32 (s, 3H).  $^{19}\text{F}$  NMR (376 MHz, chloroform-d)  $\delta$  -69.02(d,  $J$  = 9.0 Hz).  $^{13}\text{C}$  NMR (100 MHz, chloroform-d)  $\delta$  138.24, 135.71, 134.21, 133.28, 133.13, 130.32, 129.31, 128.98, 126.42, 125.79 (q,  $J$  = 280 Hz), 120.90, 52.75(q,  $J$  = 28 Hz), 21.19. HRMS (ESI)  $m/z$ :  $[\text{M}-\text{H}]^-$  Calcd for  $\text{C}_{17}\text{H}_{13}\text{ClF}_3$  308.9780, found 308.9788.

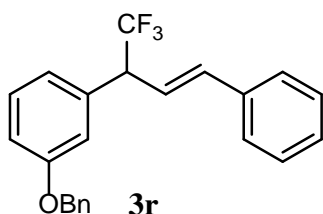

**(E)-1-(benzyloxy)-3-(1,1,1-trifluoro-4-phenylbut-3-en-2-yl)benzene (3r).** Following the standard procedure, the desired product was obtained after flash chromatography (PE/EA = 0-5% as eluent) as colorless oil (44 mg, 60 %).  $^1\text{H}$  NMR (400 MHz, chloroform-d)  $\delta$  7.56 (d,  $J$  = 6.9 Hz, 2H), 7.53 – 7.48 (m, 4H), 7.47 – 7.40 (m, 4H), 7.39 – 7.35 (m, 1H), 7.15 – 7.06 (m, 3H), 6.70 (d,  $J$  = 15.9 Hz, 1H), 6.53 (dd,  $J$  = 15.9, 8.1 Hz, 1H), 5.19 (s, 2H), 4.23 (p,  $J$  = 9.0 Hz, 1H).  $^{19}\text{F}$  NMR (376 MHz, chloroform-d)  $\delta$  -68.64 (d,  $J$  = 9.2 Hz).  $^{13}\text{C}$  NMR (100 MHz, chloroform-d)  $\delta$  159.04, 136.73, 136.19, 135.54, 129.87, 128.63, 128.18, 128.08, 127.60, 126.01(q,  $J$  = 280 Hz), 126.59, 122.51, 121.63, 115.397, 114.26, 70.13, 53.47(q,  $J$  = 28 Hz). HRMS (EI)  $m/z$ :  $[\text{M}]^+$  Calcd for  $\text{C}_{23}\text{H}_{19}\text{F}_3\text{O}$  368.0301, found 368.0300.

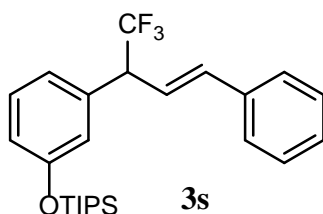

**(E)-triisopropyl(3-(1,1,1-trifluoro-4-phenylbut-3-en-2-yl)phenoxy)silane (3s).** Following the standard procedure, the desired product was obtained after flash chromatography (PE as eluent) as colorless oil (47 mg, 72 %).  $^1\text{H}$  NMR

(400 MHz, chloroform-d)  $\delta$  7.37 (d,  $J$  = 7.1 Hz, 2H), 7.33-7.29 (m, 2H), 7.27 – 7.19 (m, 2H), 6.94 (d,  $J$  = 8.3 Hz, 2H), 6.88 – 6.85 (m, 1H), 6.56 (d,  $J$  = 15.9 Hz, 1H), 6.41 (dd,  $J$  = 15.9, 7.8 Hz, 1H), 4.08 (p,  $J$  = 9.0 Hz, 1H), 1.30 – 1.21 (m, 3H), 1.09 (d,  $J$  = 7.2 Hz, 18H).  $^{19}\text{F}$  NMR (376 MHz, chloroform-d)  $\delta$  -68.83 (d,  $J$  = 9.3 Hz).  $^{13}\text{C}$  NMR (100 MHz, chloroform-d)  $\delta$  156.29, 136.17, 135.85, 135.34, 129.63, 128.55, 128.05, 126.47, 125.99 (q,  $J$  = 279 Hz), 122.64, 121.71, 120.62, 119.71, 53.16(q,  $J$  = 27 Hz), 17.82, 12.61. HRMS (ESI)  $m/z$ :  $[\text{M}+\text{H}]^+$  Calcd for  $\text{C}_{25}\text{H}_{34}\text{F}_3\text{OSi}$  435.2331, found 435.2328.

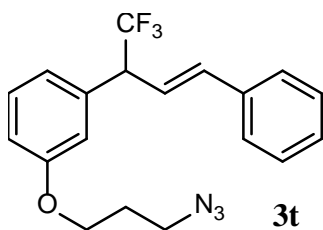

**(*E*)-1-(3-azidopropoxy)-3-(1,1,1-trifluoro-4-phenylbut-3-en-2-yl)benzene (3t).** Following the standard procedure, the desired product was obtained after flash chromatography (PE as eluent) as colorless oil (44 mg, 61 %).  $^1\text{H}$  NMR (400 MHz, chloroform-d)  $\delta$  7.37 – 7.31 (m, 2H), 7.27-7.23 (m, 3H), 7.21 (d,  $J$  = 4.5 Hz, 1H), 6.94 (d,  $J$  = 7.8 Hz, 1H), 6.88 (s, 1H), 6.83 (dd,  $J$  = 8.2, 2.4 Hz, 1H), 6.55 (d,  $J$  = 15.8 Hz, 1H), 6.38 (dd,  $J$  = 15.9, 8.0 Hz, 1H), 4.10 – 4.03 (m, 1H), 4.09-4.01 (m, 2H), 3.48 (t,  $J$  = 6.6 Hz, 2H), 2.04-1.98 (m, 2H).  $^{19}\text{F}$  NMR (376 MHz, chloroform-d)  $\delta$  -68.80 (d,  $J$  = 9.3 Hz).  $^{13}\text{C}$  NMR (100 MHz, chloroform-d)  $\delta$  158.91, 136.22, 136.12, 135.54, 129.85, 128.60, 128.16, 126.55, 125.97(q,  $J$  = 277 Hz), 122.47, 121.56, 115.55, 113.84, 64.54, 53.42(q,  $J$  = 26 Hz), 48.21, 28.77. HRMS (ESI)  $m/z$ :  $[\text{M}-\text{N}_2+\text{H}]^+$  Calcd for  $\text{C}_{19}\text{H}_{19}\text{F}_3\text{NO}$  334.1419, found 334.1417.

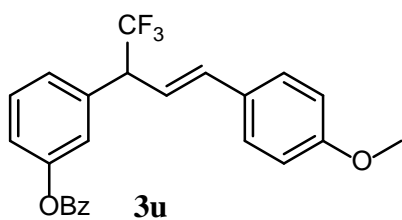

**(*E*)-3-(1,1,1-trifluoro-4-(4-methoxyphenyl)but-3-en-2-yl)phenyl benzoate (3u).** Following the standard procedure, the desired product was obtained after flash chromatography (PE/EA = 0-10% as eluent) as colorless oil (42 mg, 52 %).  $^1\text{H}$  NMR (400 MHz, chloroform-d)  $\delta$  8.21 (d,  $J$  = 7.6 Hz, 2H), 7.66-7.62 (m, 1H), 7.54-7.50 (m, 2H), 7.47-7.43 (m, 1H), 7.36 – 7.22 (m, 5H), 6.85 (d,  $J$  = 8.6 Hz, 2H), 6.56 (d,  $J$  = 15.9 Hz, 1H), 6.28 (dd,  $J$  = 15.8, 8.1 Hz, 1H), 4.16 (p,  $J$  = 9.1 Hz, 1H), 3.80 (s, 3H).  $^{19}\text{F}$  NMR (376 MHz, chloroform-d)  $\delta$  -69.07 (d,  $J$  = 9.2 Hz).  $^{13}\text{C}$  NMR (100 MHz, chloroform-d)  $\delta$  164.70, 159.42, 150.87, 136.26, 135.09, 133.43, 129.93, 129.51, 129.12, 128.34, 127.59, 127.19, 126.23, 125.65 (q,  $J$  = 280 Hz), 122.05, 121.38, 119.45, 113.76, 55.04, 52.34 (q,  $J$  = 28 Hz). HRMS (ESI)  $m/z$ :  $[\text{M}+\text{H}]^+$  Calcd for  $\text{C}_{24}\text{H}_{20}\text{F}_3\text{O}_3$  413.1365, found 413.1361.

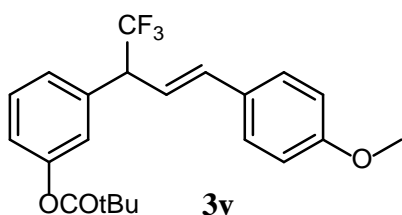

**(E)-3-(1, 1, 1-trifluoro-4-(4-methoxyphenyl)but-3-en-2-yl)phenyl pivalate (3v).** Following the standard procedure, the desired product was obtained after flash chromatography (PE/EA = 0-10% as eluent) as colorless oil (47 mg, 61 %).  $^1\text{H}$  NMR (400 MHz, chloroform- $d$ )  $\delta$  7.38 (dd,  $J$  = 9.0, 6.7 Hz, 1H), 7.32 (d,  $J$  = 8.6 Hz, 2H), 7.24 (d,  $J$  = 7.9 Hz, 1H), 7.12 – 7.03 (m, 2H), 6.85 (d,  $J$  = 8.6 Hz, 2H), 6.53 (d,  $J$  = 15.8 Hz, 1H), 6.26 (dd,  $J$  = 15.8, 8.1 Hz, 1H), 4.12 (p,  $J$  = 9.2 Hz, 1H), 3.80 (s, 3H), 1.36 (s, 9H).  $^{19}\text{F}$  NMR (376 MHz, chloroform- $d$ )  $\delta$  -68.90 (d,  $J$  = 9.3 Hz).  $^{13}\text{C}$  NMR (100 MHz, chloroform- $d$ )  $\delta$  176.89, 159.77, 151.38, 136.43, 135.36, 129.70, 128.90, 127.92, 126.19, 126.05 (q,  $J$  = 291 Hz), 122.18, 121.45, 119.89, 114.10, 55.37, 53.03 (q,  $J$  = 27 Hz), 39.18, 27.20. HRMS (ESI)  $m/z$ :  $[\text{M}+\text{H}]^+$  Calcd for  $\text{C}_{22}\text{H}_{24}\text{F}_3\text{O}_3$  393.1672, found 393.1675.

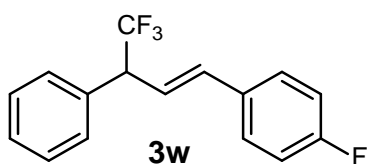

**(E)-1-fluoro-4-(4,4,4-trifluoro-3-phenylbut-1-en-1-yl)benzene (3w).** Following the standard procedure, the desired product was obtained after flash chromatography (PE as eluent) as colorless oil (44 mg, 79 %).  $^1\text{H}$  NMR (400 MHz, chloroform- $d$ )  $\delta$  7.41 – 7.33 (m, 6H), 7.03-6.99 (m, 2H), 6.55 (d,  $J$  = 15.9 Hz, 1H), 6.37 (dd,  $J$  = 15.9, 8.0 Hz, 1H), 4.13 (p,  $J$  = 9.1 Hz, 1H).  $^{19}\text{F}$  NMR (376 MHz, chloroform- $d$ )  $\delta$  -68.91 (d,  $J$  = 9.3 Hz), -113.52 – -113.59 (m). HRMS (ESI)  $m/z$ :  $[\text{M}+\text{H}]^+$  Calcd for  $\text{C}_{16}\text{H}_{12}\text{F}_4$  280.2023, found 280.2028.

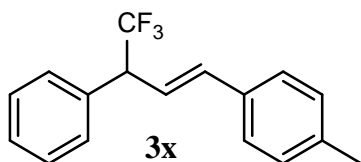

**(E)-1-methyl-4-(4,4,4-trifluoro-3-phenylbut-1-en-1-yl)benzene (3x).** Following the standard procedure, the desired product was obtained after flash chromatography (PE as eluent) as colorless oil (33 mg, 60 %).  $^1\text{H}$  NMR (400 MHz, chloroform- $d$ )  $\delta$  7.40 – 7.34 (m, 4H), 7.28 (d,  $J$  = 8.0 Hz, 2H), 7.13 (d,  $J$  = 7.9 Hz, 2H), 6.55 (d,  $J$  = 15.9 Hz, 1H), 6.40 (dd,  $J$  = 15.8, 8.0 Hz, 1H), 4.13 (p,  $J$  = 9.2 Hz, 1H), 2.34 (s, 3H).  $^{19}\text{F}$  NMR (376 MHz, chloroform- $d$ )  $\delta$  -68.94 (d,  $J$  = 9.4 Hz).  $^{13}\text{C}$  NMR (100 MHz, chloroform- $d$ )  $\delta$  138.06, 135.35, 134.88, 133.39, 129.29, 128.99, 128.78, 128.17, 126.44, 126.09 (q,  $J$  = 280 Hz), 121.57, 53.45 (q,  $J$  = 27 Hz), 21.20. HRMS (ES)  $m/z$ :  $[\text{M}]^+$  Calcd

for C<sub>17</sub>H<sub>15</sub>F<sub>3</sub> 276.1126, found 276.1127.

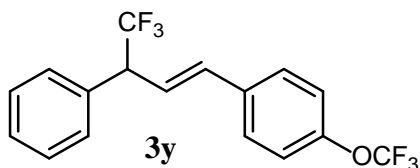

**(E)-3-(1,1,1-trifluoro-4-(4-methoxyphenyl)but-3-en-2-yl)phenyl benzoate (3y).** Following the standard procedure, the desired product was obtained after flash chromatography (PE as eluent) as colorless oil (42 mg, 63 %). <sup>1</sup>H NMR (400 MHz, chloroform-d) δ 7.43 – 7.36 (m, 6H), 7.17 (d, *J* = 8.4 Hz, 2H), 6.57 (d, *J* = 15.9 Hz, 1H), 6.44 (dd, *J* = 15.9, 7.9 Hz, 1H), 4.15 (p, *J* = 9.1 Hz, 1H). <sup>19</sup>F NMR (376 MHz, chloroform-d) δ -57.91, -68.87 (d, *J* = 9.3 Hz). <sup>13</sup>C NMR (100 MHz, chloroform-d) δ 148.61, 134.57, 134.11, 133.68, 128.61, 128.02, 127.50, 125.37(q, *J* = 280 Hz), 123.50, 120.75, 115.11 (q, *J* = 257 Hz), 53.07(q, *J* = 27 Hz). HRMS (ESI) *m/z*: [M+H]<sup>+</sup> Calcd for C<sub>17</sub>H<sub>13</sub>F<sub>6</sub>O 347.1702, found 347.1703.

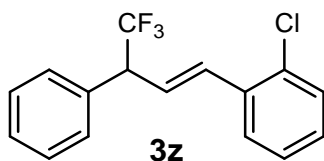

**(E)-1-chloro-2-(4,4,4-trifluoro-3-phenylbut-1-en-1-yl)benzene (3z).** Following the standard procedure, the desired product was obtained after flash chromatography (PE as eluent) as colorless oil (34 mg, 58 %). <sup>1</sup>H NMR (400 MHz, chloroform-d) δ 7.39 (d, *J* = 7.7 Hz, 1H), 7.32 – 7.12 (m, 6H), 7.09-7.02 (m, 2H), 6.85 (d, *J* = 15.8 Hz, 1H), 6.29 (dd, *J* = 15.8, 8.3 Hz, 1H), 4.06 (p, *J* = 9.0 Hz, 1H). <sup>19</sup>F NMR (376 MHz, chloroform-d) δ -68.86 (d, *J* = 9.3 Hz). <sup>13</sup>C NMR (100 MHz, chloroform-d) δ 134.26, 134.18, 133.05, 131.71, 129.55, 128.98, 128.79, 128.69, 128.15, 126.80, 126.71, 125.74 (q, *J* = 280 Hz), 125.22, 53.37 (q, *J* = 28 Hz). HRMS (ES) *m/z*: [M]<sup>+</sup> Calcd for C<sub>16</sub>H<sub>12</sub>ClF<sub>3</sub> 296.2723, found 296.2722.

## 5. General procedure for reaction of $\alpha$ -monofluoromethyl benzyl methanesulfonates

An oven-dried vial was charged with  $\alpha$ -monofluoromethyl benzyl methanesulfonates **1'** (0.2 mmol), alkenylboronic acid **2** (0.30 mmol, 1.5 equiv), K<sub>3</sub>PO<sub>4</sub> (0.4 mmol, 0.084g, 2.0 equiv), PhCF<sub>3</sub> (1.5 mL) was added and the mixture was stirred at 80 °C for 12 h under air. After that, water were added and the aqueous phase was extracted with ethyl acetate (3 x 5.0 mL). The combined organic layers were dried over Na<sub>2</sub>SO<sub>4</sub> and then concentrated. The crude product was purified by silica gel column chromatography to give product **4**.

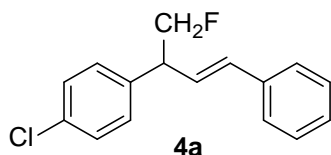

**(E)-1-chloro-4-(1-fluoro-4-phenylbut-3-en-2-yl)benzene (4a).** Following the standard procedure, the desired product was obtained after flash chromatography (PE as eluent) as colorless oil (42 mg, 83 %).  $^1\text{H}$  NMR (400 MHz, chloroform-d)  $\delta$  7.46 – 7.28 (m, 6H), 7.28 – 7.21 (m, 3H), 6.51 (d,  $J$  = 16.0 Hz, 1H), 6.36 (dd,  $J$  = 16.0, 7.2 Hz, 1H), 4.79 – 4.72 (m, 1H), 4.67 – 4.60 (m, 1H), 3.94 – 3.83 (m, 1H).  $^{19}\text{F}$  NMR (376 MHz, chloroform-d)  $\delta$  -217.51 - -217.81 (m).  $^{13}\text{C}$  NMR (100 MHz, chloroform-d)  $\delta$  138.13, 138.09, 136.65, 132.89, 132.51, 129.38, 128.78, 128.47, 127.59, 126.20, 85.38(d,  $J$  = 179 Hz), 48.55 (d,  $J$  = 19 Hz). HRMS (ES)  $m/z$ :  $[\text{M}]^+$  Calcd for  $\text{C}_{16}\text{H}_{14}\text{ClF}$  260.0768, found 260.0762.

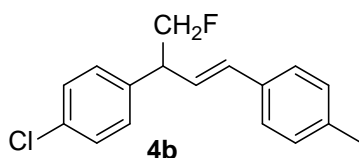

**(E)-1-chloro-4-(1-fluoro-4-(p-tolyl)but-3-en-2-yl)benzene (4b).** Following the standard procedure, the desired product was obtained after flash chromatography (PE as eluent) as colorless oil (44 mg, 81 %).  $^1\text{H}$  NMR (400 MHz, chloroform-d)  $\delta$  7.35 (d,  $J$  = 8.4 Hz, 2H), 7.33 – 7.21 (m, 4H), 7.14 (d,  $J$  = 7.9 Hz, 2H), 6.49 (d,  $J$  = 16.0 Hz, 1H), 6.31 (dd,  $J$  = 16.0, 7.3 Hz, 1H), 4.79 – 4.59 (m, 2H), 3.92-3.83 (m, 1H), 2.36 (s, 3H).  $^{19}\text{F}$  NMR (376 MHz, chloroform-d)  $\delta$  -217.44 – -217.74 (m).  $^{13}\text{C}$  NMR (100 MHz, chloroform-d)  $\delta$  138.38, 137.58, 133.98, 132.94, 132.48, 129.53, 129.31, 128.88, 126.54, 126.24, 85.58 (d,  $J$  = 175 Hz), 48.68 (d,  $J$  = 20 Hz), 21.21. HRMS (ES)  $m/z$ :  $[\text{M}]^+$  Calcd for  $\text{C}_{17}\text{H}_{16}\text{ClF}$  274.0925, found 274.0920.

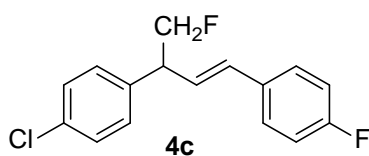

**(E)-1-chloro-4-(1-fluoro-4-(4-fluorophenyl)but-3-en-2-yl)benzene (4c).** Following the standard procedure, the desired product was obtained after flash chromatography (PE as eluent) as colorless oil (43 mg, 78 %).  $^1\text{H}$  NMR (400 MHz, chloroform-d)  $\delta$  7.36-7.32 (m, 4H), 7.25 (d,  $J$  = 8.3 Hz, 2H), 7.03-6.99 (m, 2H), 6.47 (d,  $J$  = 16.0 Hz, 1H), 6.28 (dd,  $J$  = 16.0, 7.2 Hz, 1H), 4.78-4.59 (m, 2H), 3.91-3.82 (m, 1H).  $^{19}\text{F}$  NMR (376 MHz, chloroform-d)  $\delta$  -114.37 – -218.05 (m).  $^{13}\text{C}$  NMR (100 MHz, chloroform-d)  $\delta$  162.23 (d,  $J$  = 246 Hz), 137.98, 132.92, 132.78, 131.30, 129.31, 128.78, 127.68 (d,  $J$  = 7 Hz), 127.38, 115.33 (d,  $J$  = 22 Hz), 85.29 (d,  $J$  = 165 Hz), 48.50 (d,  $J$  = 20 Hz). HRMS (ES)  $m/z$ :  $[\text{M}]^+$  Calcd for  $\text{C}_{16}\text{H}_{13}\text{ClF}_2$  278.0674, found 278.0670.

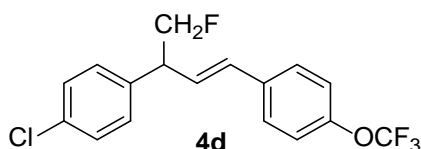

**(E)-1-chloro-4-(1-fluoro-4-(4-(trifluoromethoxy)phenyl)but-3-en-2-yl)benzene (4d).** Following the standard procedure, the desired product was obtained after flash chromatography (PE as eluent) as colorless oil (61 mg, 90 %).  $^1\text{H}$  NMR (400 MHz, chloroform-d)  $\delta$  7.40-7.34 (m, 4H), 7.24 (d,  $J$  = 8.4 Hz, 2H), 7.17 (d,  $J$  = 8.4 Hz, 2H), 6.50 (d,  $J$  = 16.0 Hz, 1H), 6.35 (dd,  $J$  = 16.0, 7.1 Hz, 1H), 4.76-4.62 (m, 2H), 3.93-3.83 (m, 1H).  $^{19}\text{F}$  NMR (376 MHz, chloroform-d)  $\delta$  -57.92, -217.79 – -218.09 (m).  $^{13}\text{C}$  NMR (100 MHz, chloroform-d)  $\delta$  148.58, 137.87, 135.51, 133.13, 131.14, 129.42, 128.93, 128.86, 127.52, 121.03, 120.44 (d,  $J$  = 256 Hz), 85.32 (d,  $J$  = 175 Hz), 48.61 (d,  $J$  = 20 Hz). HRMS (ESI)  $m/z$ :  $[\text{M}+\text{H}]^+$  Calcd for  $\text{C}_{17}\text{H}_{14}\text{ClF}_4\text{O}$  345.0669, found 345.0663.

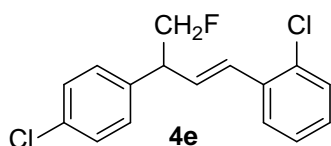

**(E)-1-chloro-2-(3-(4-chlorophenyl)-4-fluorobut-1-en-1-yl)benzene (4e).** Following the standard procedure, the desired product was obtained after flash chromatography (PE as eluent) as colorless oil (45 mg, 78 %).  $^1\text{H}$  NMR (400 MHz, chloroform-d)  $\delta$  7.53 (dd,  $J$  = 7.4, 1.8 Hz, 1H), 7.39 – 7.33 (m, 3H), 7.25 (s, 2H), 7.24 – 7.16 (m, 2H), 6.93 (d,  $J$  = 16.0 Hz, 1H), 6.34 (dd,  $J$  = 16.0, 7.4 Hz, 1H), 4.80 - 4.62 (m, 2H), 3.97 - 3.88 (m, 1H).  $^{19}\text{F}$  NMR (376 MHz, chloroform-d)  $\delta$  -218.03 – -218.33 (m).  $^{13}\text{C}$  NMR (100 MHz, chloroform-d)  $\delta$  137.97, 137.94, 134.98, 133.12, 133.05, 130.62, 130.57, 129.71, 129.48, 128.95, 128.72, 126.84, 85.43 (d,  $J$  = 175 Hz), 48.84 (d,  $J$  = 20 Hz). HRMS (ES)  $m/z$ :  $[\text{M}]^+$  Calcd for  $\text{C}_{16}\text{H}_{13}\text{Cl}_2\text{F}$  294.0378, found 294.0371.

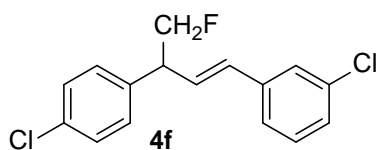

**(E)-1-chloro-3-(3-(4-chlorophenyl)-4-fluorobut-1-en-1-yl)benzene (4f).** Following the standard procedure, the desired product was obtained after flash chromatography (PE as eluent) as colorless oil (45 mg, 77 %).  $^1\text{H}$  NMR (400 MHz, chloroform-d)  $\delta$  7.41 – 7.30 (m, 3H), 7.26 – 7.19 (m, 5H), 6.45 (d,  $J$  = 16.1 Hz, 1H), 6.37 (dd,  $J$  = 16.0, 6.6 Hz, 1H), 4.75 - 4.61 (m, 2H), 3.91 - 3.82 (m, 1H).  $^{19}\text{F}$  NMR (376 MHz, chloroform-d)  $\delta$  -217.70 – -218.00 (m).  $^{13}\text{C}$  NMR (100 MHz, chloroform-d)  $\delta$  138.62, 137.76, 134.57, 133.16, 131.32, 129.78, 129.46, 129.35, 128.97, 127.63, 126.21, 124.58, 85.32 (d,  $J$  = 175 Hz), 48.62 (d,  $J$  = 19 Hz). HRMS (ES)  $m/z$ :  $[\text{M}]^+$  Calcd for  $\text{C}_{16}\text{H}_{13}\text{Cl}_2\text{F}$  294.0378, found 294.0371.



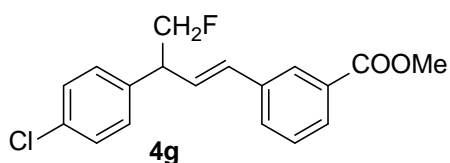

**Methyl (*E*)-3-(3-(4-chlorophenyl)-4-fluorobut-1-en-1-yl)benzoate (4g).** Following the standard procedure, the desired product was obtained after flash chromatography (PE/EA = 0-5% as eluent) as colorless oil (49 mg, 77 %). <sup>1</sup>H NMR (400 MHz, chloroform-d) δ 8.03 (s, 1H), 7.93 – 7.86 (m, 1H), 7.52 (d, *J* = 7.4 Hz, 1H), 7.39 – 7.32 (m, 3H), 7.27 – 7.19 (m, 2H), 6.51 (d, *J* = 16.1 Hz, 1H), 6.42 (dd, *J* = 16.1, 6.8 Hz, 1H), 4.74 – 4.61 (m, 2H), 3.91 (s, 3H). <sup>19</sup>F NMR (376 MHz, chloroform-d) δ -217.83 – -218.12 (m). <sup>13</sup>C NMR (100 MHz, chloroform-d) δ 166.86, 137.83, 137.05, 133.11, 131.64, 130.64, 130.53, 129.43, 129.11, 128.91, 128.61, 127.24, 85.31 (d, *J* = 175 Hz), 52.08, 48.64 (d, *J* = 20 Hz). HRMS (ESI) *m/z*: [M+H]<sup>+</sup> Calcd for C<sub>18</sub>H<sub>17</sub>ClFO<sub>2</sub> 319.0901, found 319.0903.

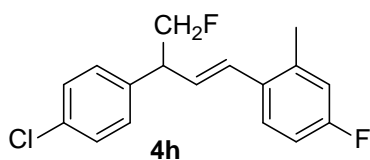

**(*E*)-1-(3-(4-chlorophenyl)-4-fluorobut-1-en-1-yl)-4-fluoro-2-methylbenzene (4h).** Following the standard procedure, the desired product was obtained after flash chromatography (PE as eluent) as colorless oil (42 mg, 72 %). <sup>1</sup>H NMR (400 MHz, chloroform-d) δ 7.34 (d, *J* = 8.4 Hz, 2H), 7.26 – 7.23 (m, 2H), 7.19 (d, *J* = 7.4 Hz, 1H), 7.16 – 7.13 (m, 1H), 6.96 – 6.92 (m, 1H), 6.47 – 6.38 (m, 1H), 6.25 (dd, *J* = 16.0, 7.2 Hz, 1H), 4.79 – 4.57 (m, 2H), 3.90 – 3.78 (m, 1H), 2.26 (s, 3H). <sup>19</sup>F NMR (376 MHz, chloroform-d) δ -118.52 – -118.54 (m), -217.59 – -217.88 (m). <sup>13</sup>C NMR (100 MHz, chloroform-d) δ 161.45 (d, *J* = 245 Hz), 138.18, 133.01, 132.58, 131.61, 129.46, 129.28, 128.90, 127.10, 125.21 (d, *J* = 8 Hz), 124.90 (d, *J* = 17 Hz), 115.10 (d, *J* = 23 Hz), 85.55 (d, *J* = 175 Hz), 48.63 (d, *J* = 20 Hz), 14.55. HRMS (ES) *m/z*: [M]<sup>+</sup> Calcd for C<sub>17</sub>H<sub>15</sub>ClF<sub>2</sub> 292.0830, found 292.0831.

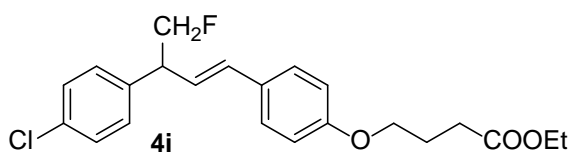

**Ethyl (*E*)-4-(4-(3-(4-chlorophenyl)-4-fluorobut-1-en-1-yl)phenoxy)butanoate (4i).** Following the standard procedure, the desired product was obtained after flash chromatography (PE/EA = 0-10% as eluent) as colorless oil (53 mg, 69 %). <sup>1</sup>H NMR (400 MHz, chloroform-d) δ 7.35 – 7.13 (m, 6H), 6.87 – 6.73 (m, 2H), 6.40 (d, *J* = 16.0 Hz, 1H), 6.20 – 6.11 (m, 1H), 4.73 – 4.54 (m, 2H), 4.15 – 4.09 (m, 2H), 4.02 – 3.91 (m, 2H), 3.86 – 3.76 (m, 1H), 2.56 – 2.40 (m, 2H), 2.15 – 2.01 (m, 2H), 1.25 – 1.21 (m, 2H). <sup>19</sup>F NMR (376 MHz, chloroform-d) δ -217.63 – -217.93 (m). <sup>13</sup>C NMR (100 MHz, chloroform-d) δ 172.97, 158.34, 138.23, 132.68, 131.78, 129.36, 129.26, 128.63, 127.25, 125.13, 114.35, 85.40 (d, *J* = 174 Hz), 66.57, 60.24, 48.45 (d, *J* = 20 Hz), 30.57, 24.41, 14.02. HRMS (ESI) *m/z*: [M+H]<sup>+</sup> Calcd for

C<sub>22</sub>H<sub>25</sub>ClFO<sub>3</sub> 391.1476, found 391.1473.

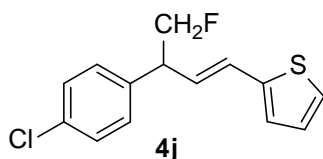

**(E)-2-(3-(4-chlorophenyl)-4-fluorobut-1-en-1-yl)thiophene (4j).** Following the standard procedure, the desired product was obtained after flash chromatography (PE as eluent) as colorless oil (40 mg, 76 %). <sup>1</sup>H NMR (400 MHz, chloroform-d) δ 7.35 (d, *J* = 8.4 Hz, 2H), 7.24 (d, *J* = 8.4 Hz, 2H), 7.17 - 7.15 (m, 1H), 6.97 - 6.94 (m, 2H), 6.61 (d, *J* = 15.8 Hz, 1H), 6.20 (dd, *J* = 15.8, 7.2 Hz, 1H), 4.76 - 4.58 (m, 2H), 3.89 - 3.80 (m, 1H). <sup>19</sup>F NMR (376 MHz, chloroform-d) δ -217.43 - -217.73 (m). <sup>13</sup>C NMR (100 MHz, chloroform-d) δ 141.78, 137.88, 133.04, 129.47, 128.88, 127.31, 127.20, 125.79, 125.69, 124.22, 85.29 (d, *J* = 176 Hz), 48.46 (d, *J* = 20 Hz). HRMS (ES) *m/z*: [M]<sup>+</sup> Calcd for C<sub>14</sub>H<sub>12</sub>ClFS 266.0332, found 266.0333.

## 6. Investigation of the metal contamination using coupled plasma mass spectroscopy

### (ICP-MS)

Because it has been reported that trace transition-metal contaminants in reagents were able to catalyze coupling reactions, we investigated the metal contamination using coupled plasma mass spectroscopy (ICP-MS) (Table 1). The content of various transition-metals such as Pd, Ni in the styryl boronic acid was below the detection limit. Pd, Ni and Co content in K<sub>3</sub>PO<sub>4</sub> are also very low. Cu and Fe contamination are slightly higher, but they are not likely able to catalyze coupling reaction.

**Table 1. ICP-MS analysis of trace transition metals**

| Metal <sup>a</sup>                                  | Pd     | Ni     | Cu     | Co     | Fe     |
|-----------------------------------------------------|--------|--------|--------|--------|--------|
| K <sub>3</sub> PO <sub>4</sub> <sup>b</sup>         | < 0.02 | < 0.02 | 0.18   | < 0.02 | 0.49   |
| Ph(CH) <sub>2</sub> B(OH) <sub>2</sub> <sup>c</sup> | < 0.02 | < 0.02 | < 0.02 | < 0.02 | < 0.02 |

<sup>a</sup> 1 unit = 1 mg/g, <sup>b</sup> K<sub>3</sub>PO<sub>4</sub> (99%) was purchased from J&K. <sup>c</sup> Ph(CH)<sub>2</sub>B(OH)<sub>2</sub> was synthesized through

Cu-catalyzed borylation of alkynes.

## 7. Copies of NMR Spectra

$^1\text{H}$  NMR (400 MHz,  $\text{CDCl}_3$ ) of 1a

PROTON\_01  
03-15-105-e

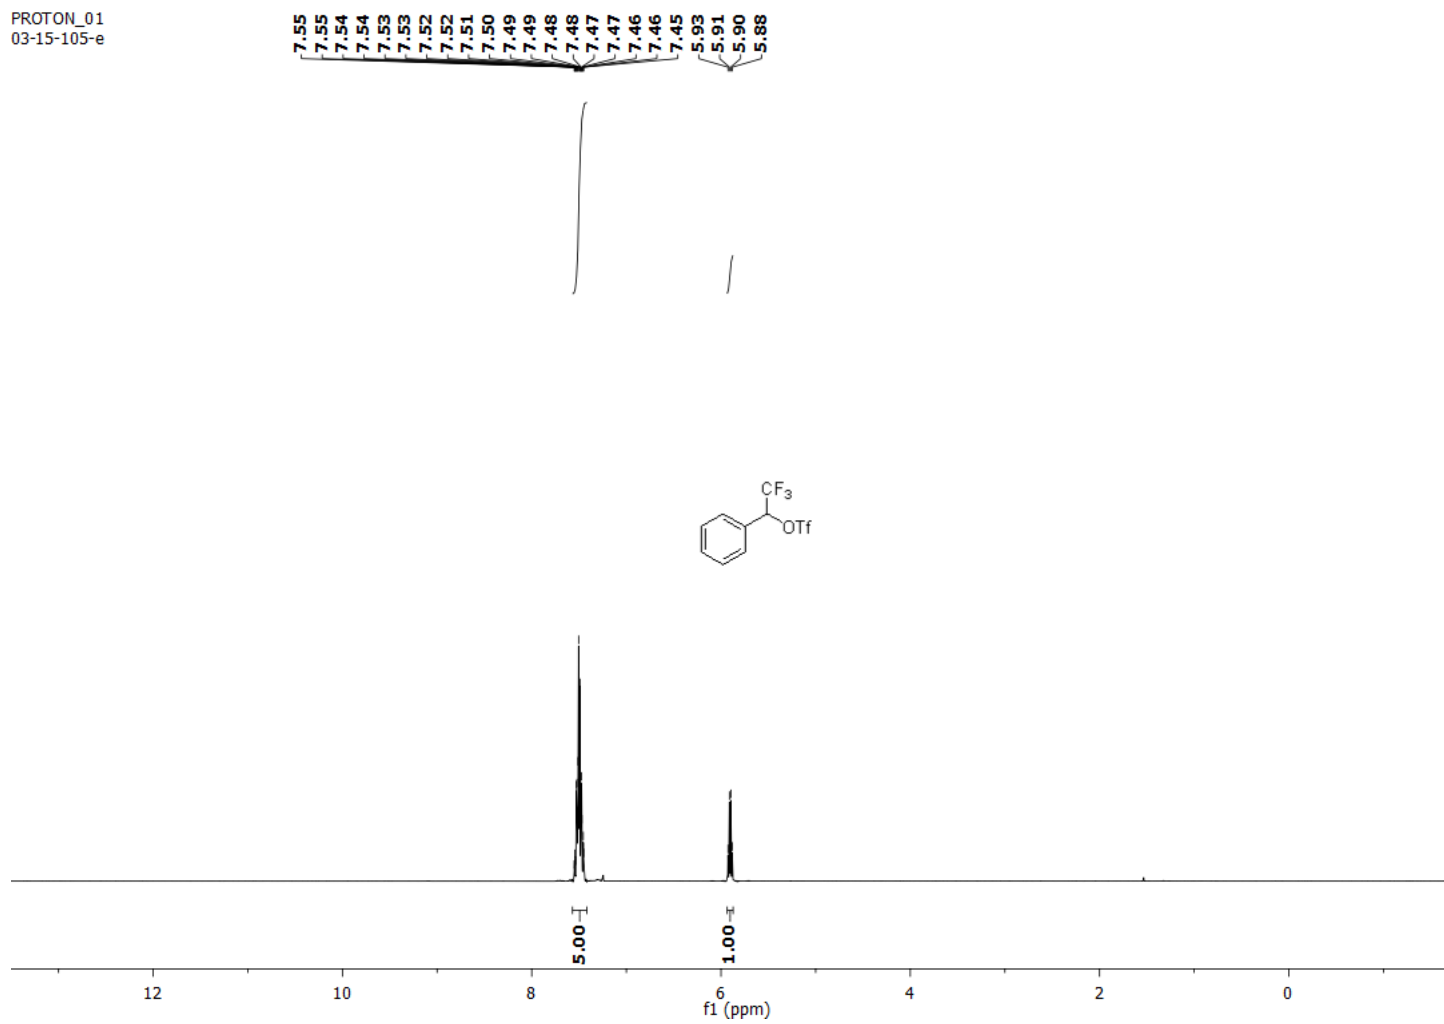

<sup>19</sup>F NMR (376 MHz, CDCl<sub>3</sub>) of 1a

FLUORINE\_01  
03-15-105-e

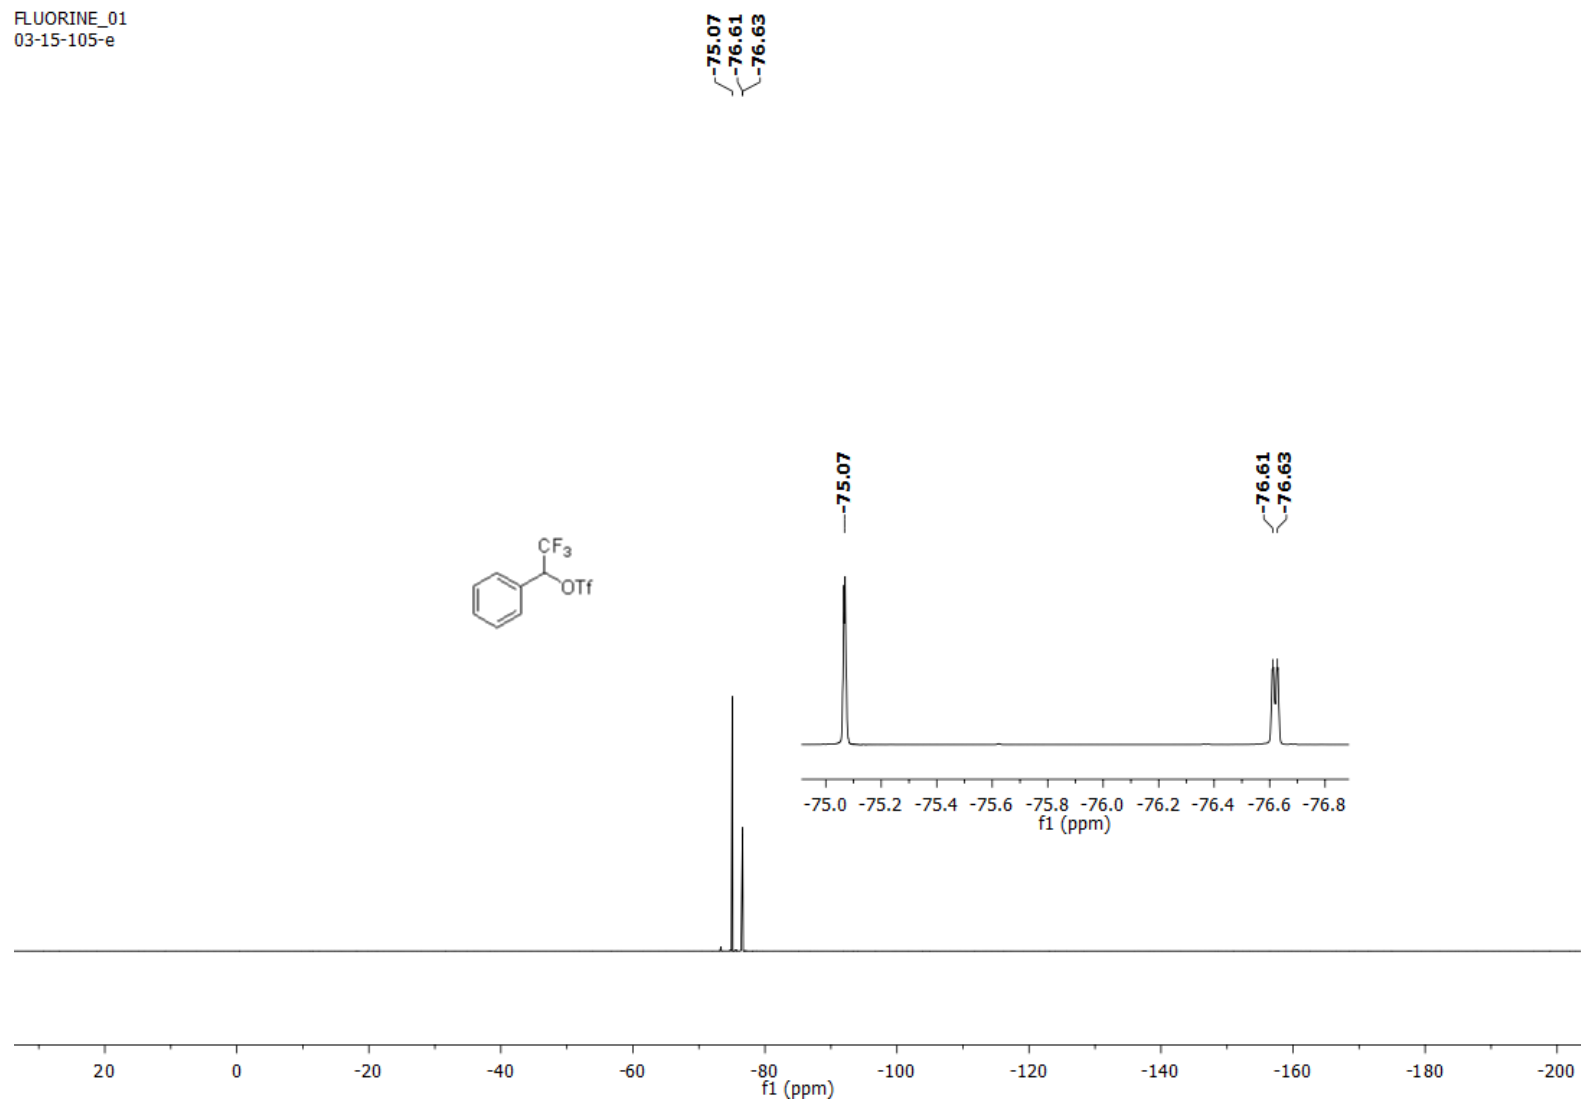



<sup>1</sup>H NMR (400 MHz, CDCl<sub>3</sub>) of 1b

PROTON\_01  
03-13-104-f

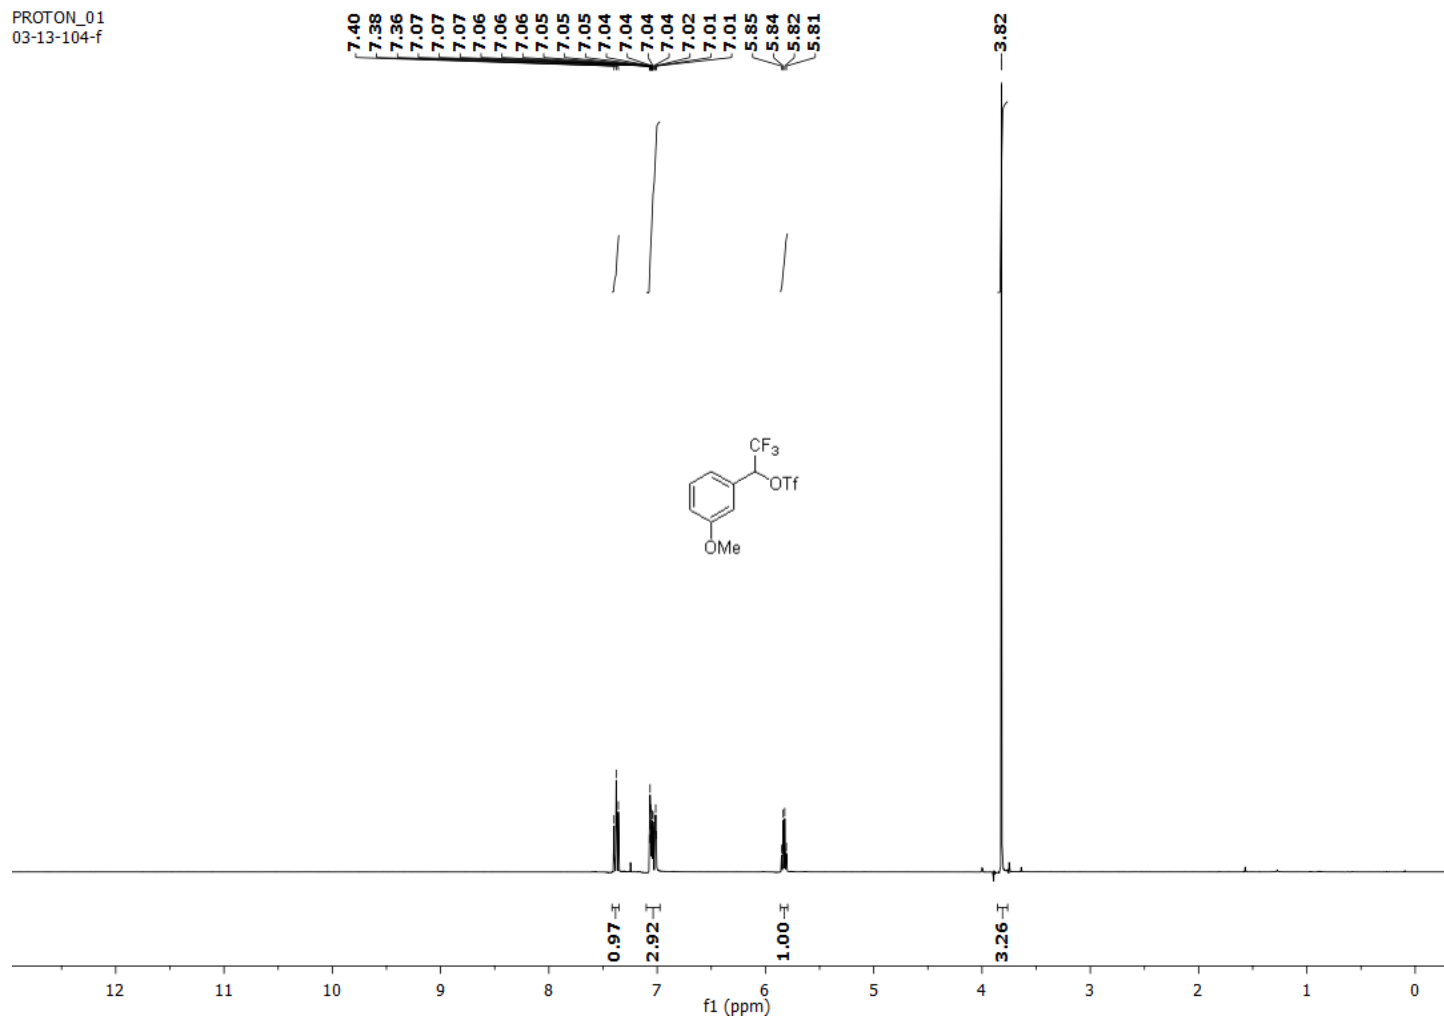

<sup>19</sup>F NMR (376 MHz, CDCl<sub>3</sub>) of 1b

FLUORINE\_01  
03-13-104-f

-74.85  
-76.34  
-76.36

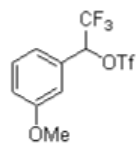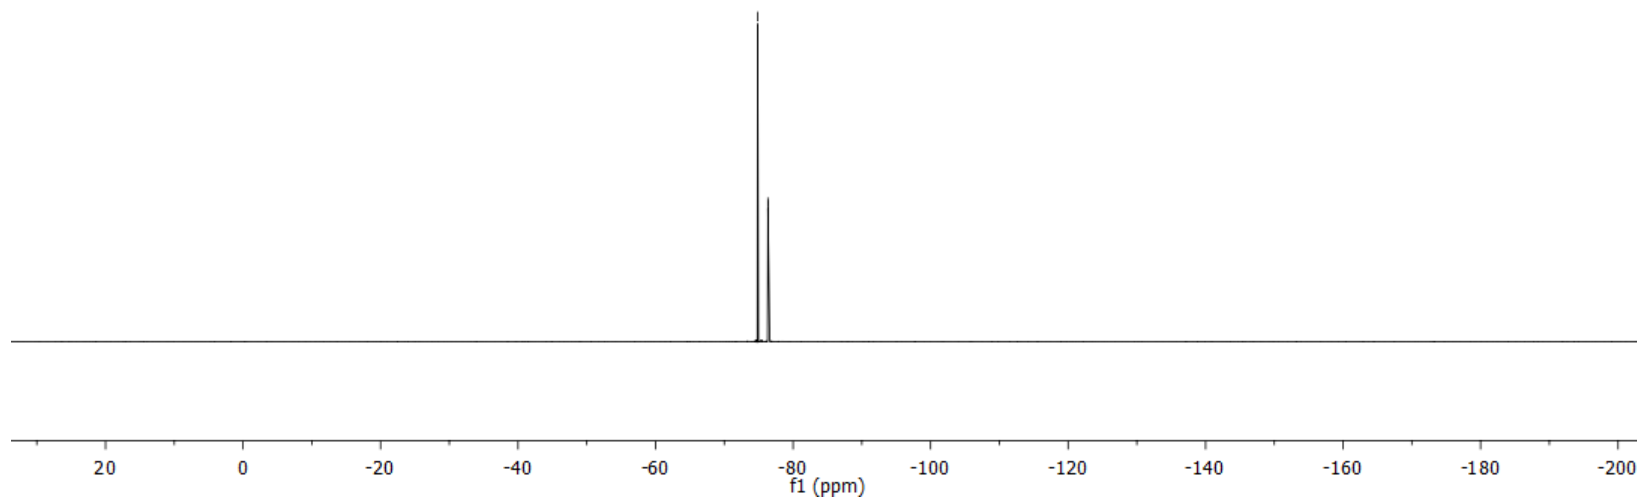

<sup>13</sup>C NMR (100 MHz, CDCl<sub>3</sub>) of 1b

CARBON\_01  
03-13-104-f

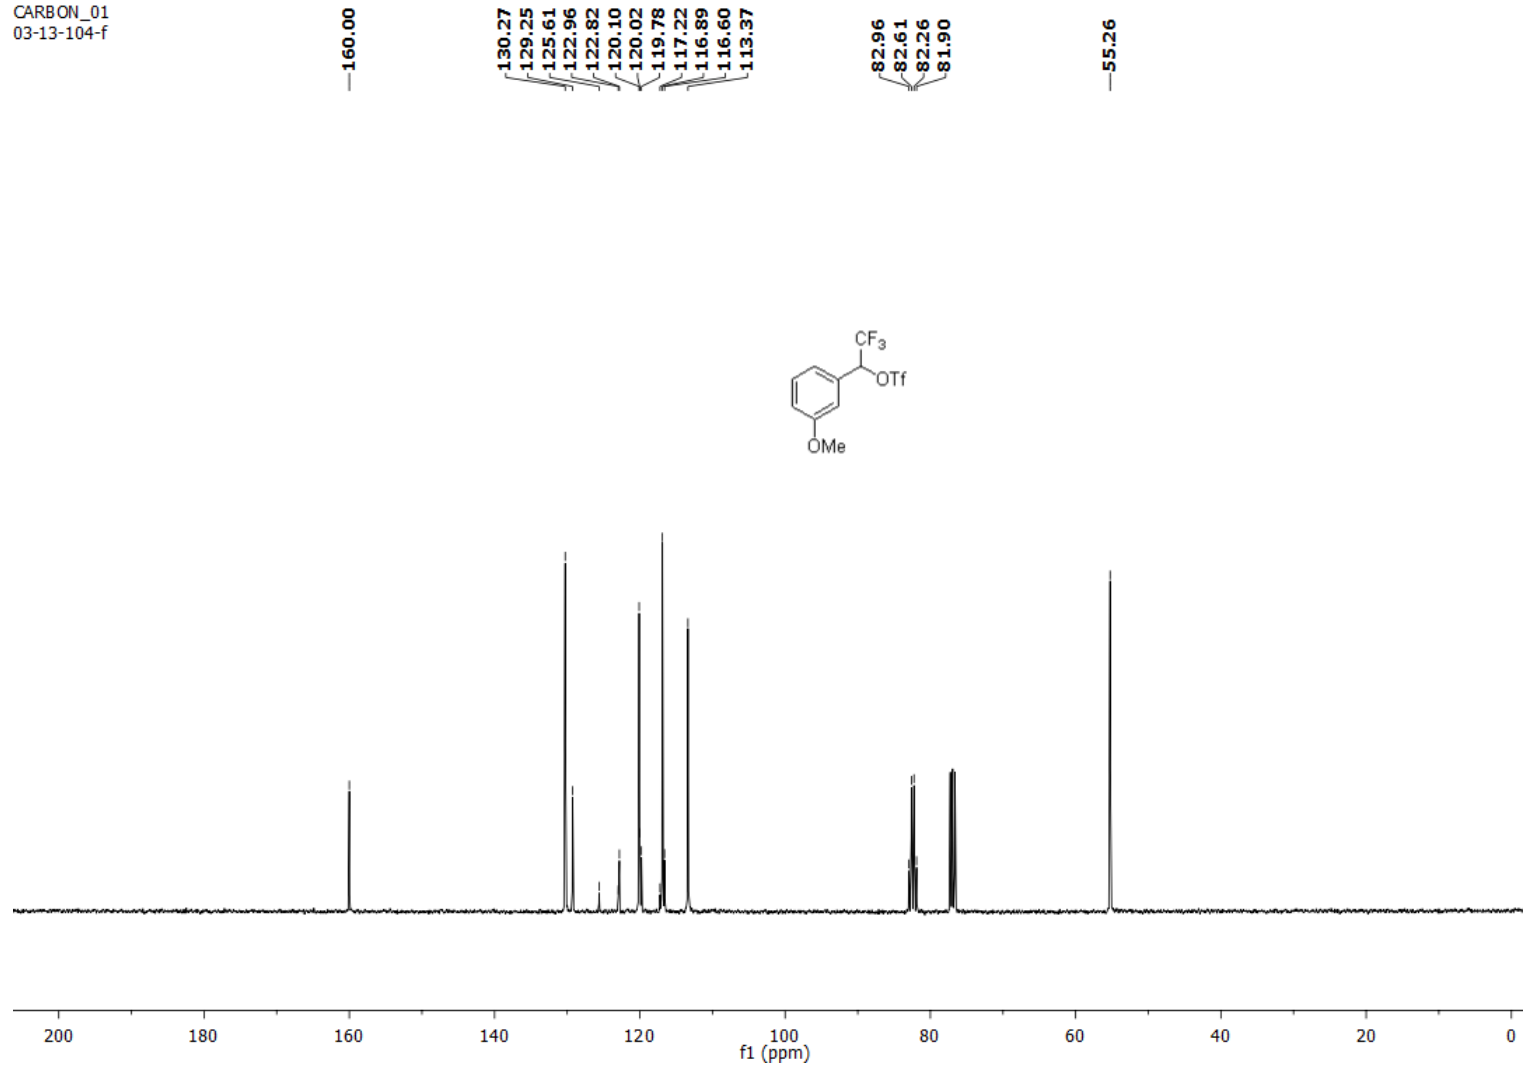



<sup>1</sup>H NMR (400 MHz, CDCl<sub>3</sub>) of 3a

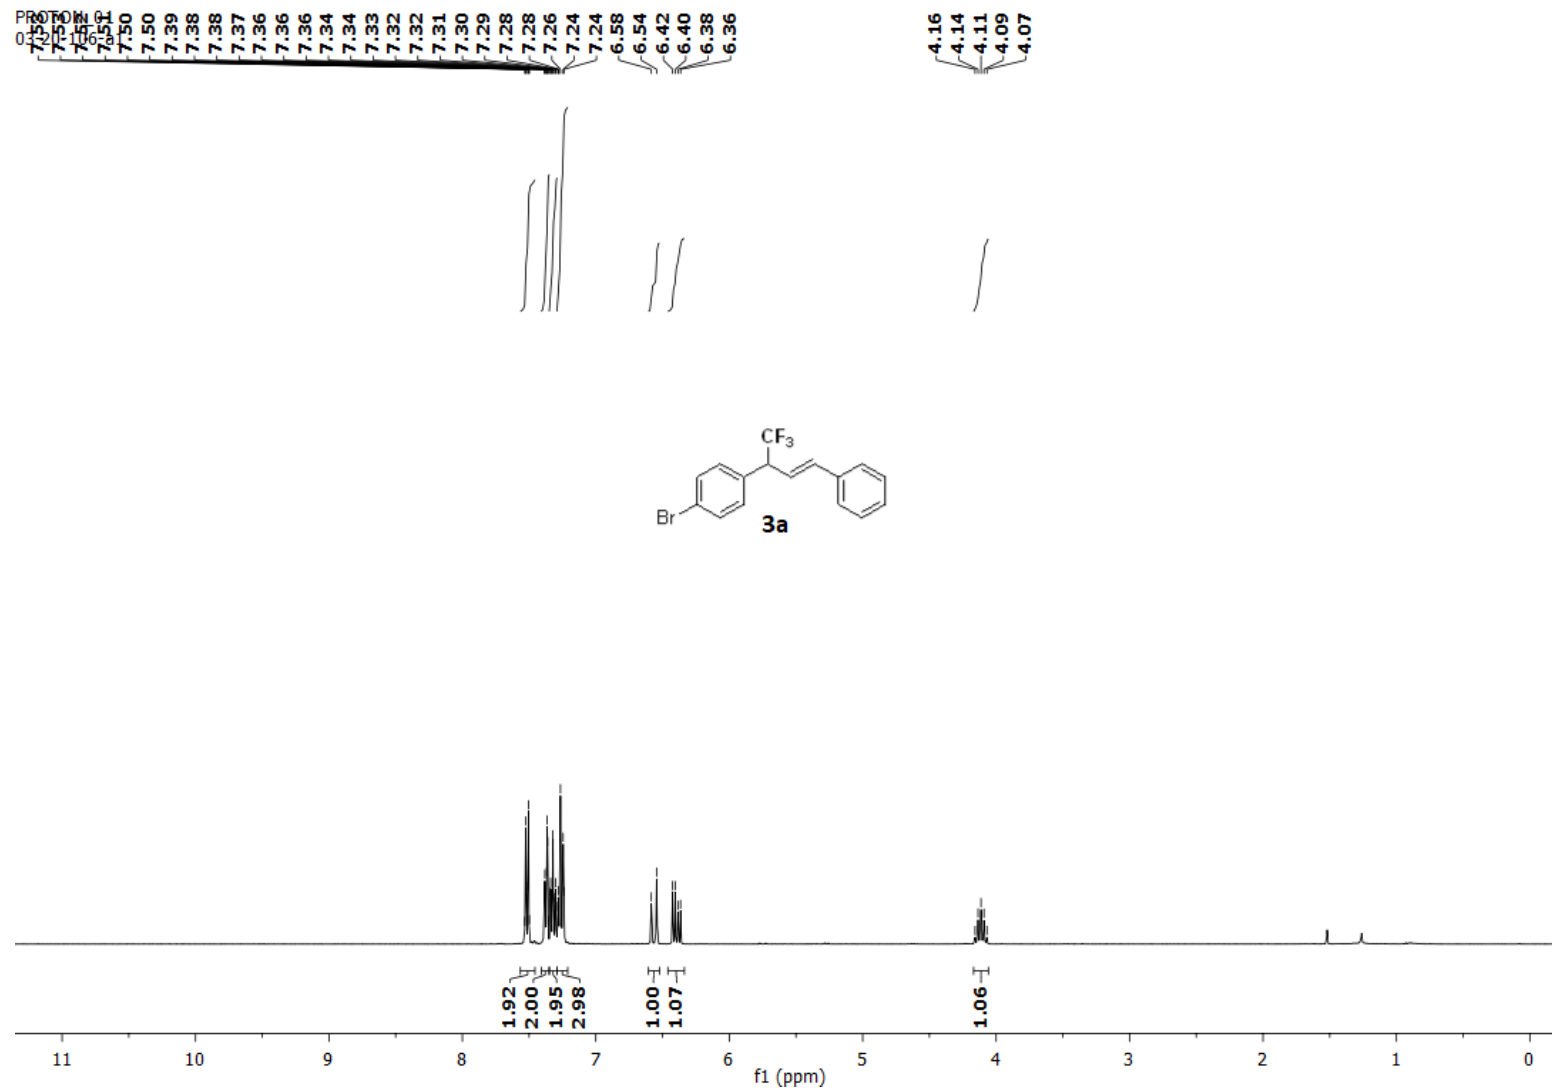

<sup>19</sup>F NMR (376 MHz, CDCl<sub>3</sub>) of 3a

FLUORINE\_01  
03-20-106-a1

-68.99  
-69.01

-68.99  
-69.01

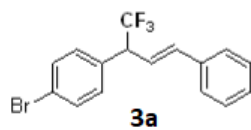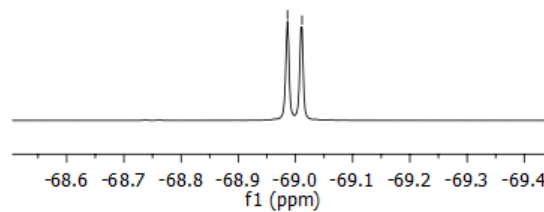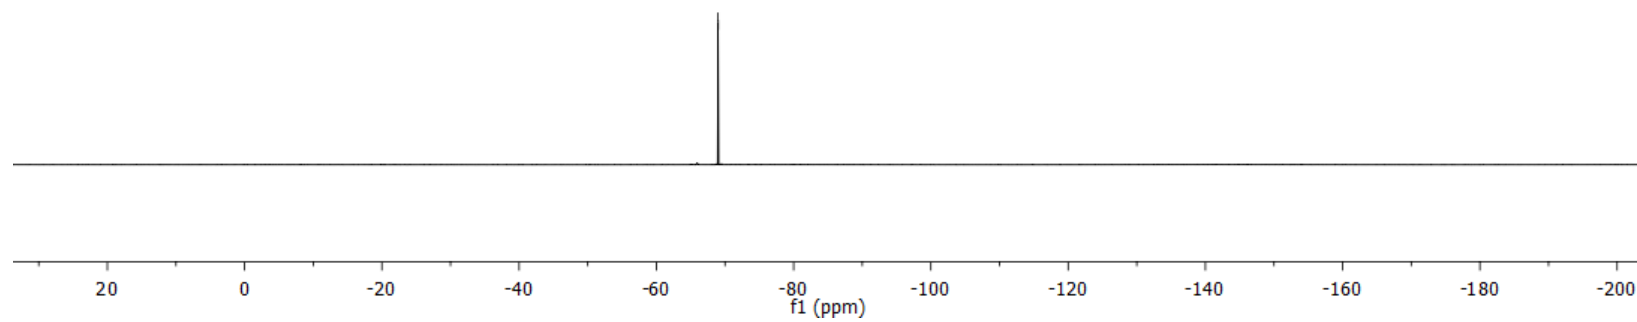

<sup>13</sup>C NMR (100 MHz, CDCl<sub>3</sub>) of 3a

CARBON\_01  
03-20-106-a11

135.89  
133.67  
131.99  
130.65  
129.89  
128.64  
128.31  
127.10  
126.53  
124.31  
122.43  
121.90  
121.52

53.24  
52.97  
52.69  
52.41

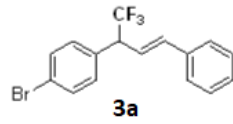

53.24  
52.97  
52.69  
52.41

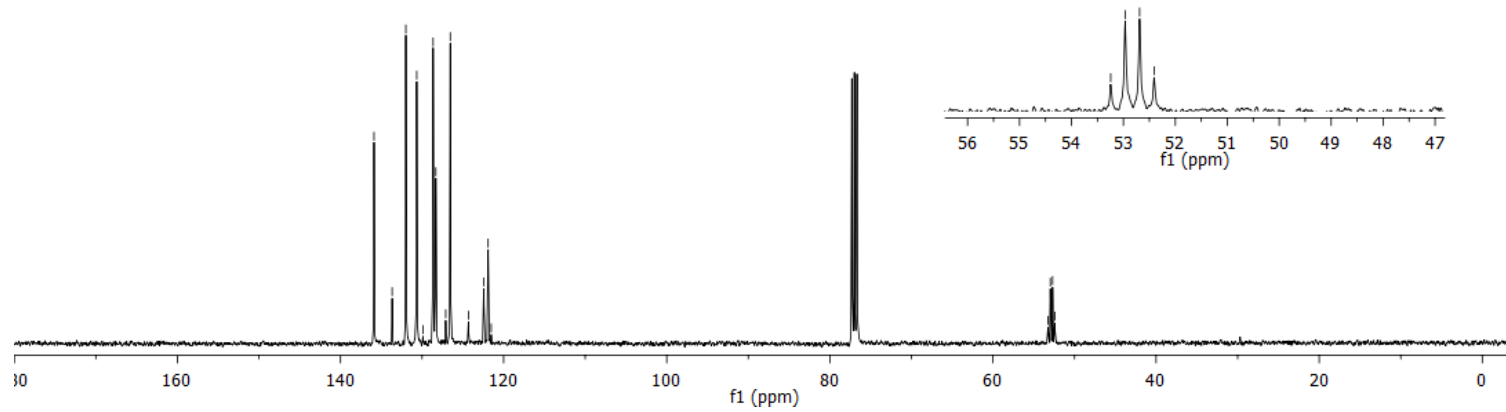

PROTON\_01  
03-19-106-k

<sup>1</sup>H NMR (400 MHz, CDCl<sub>3</sub>) of 3b

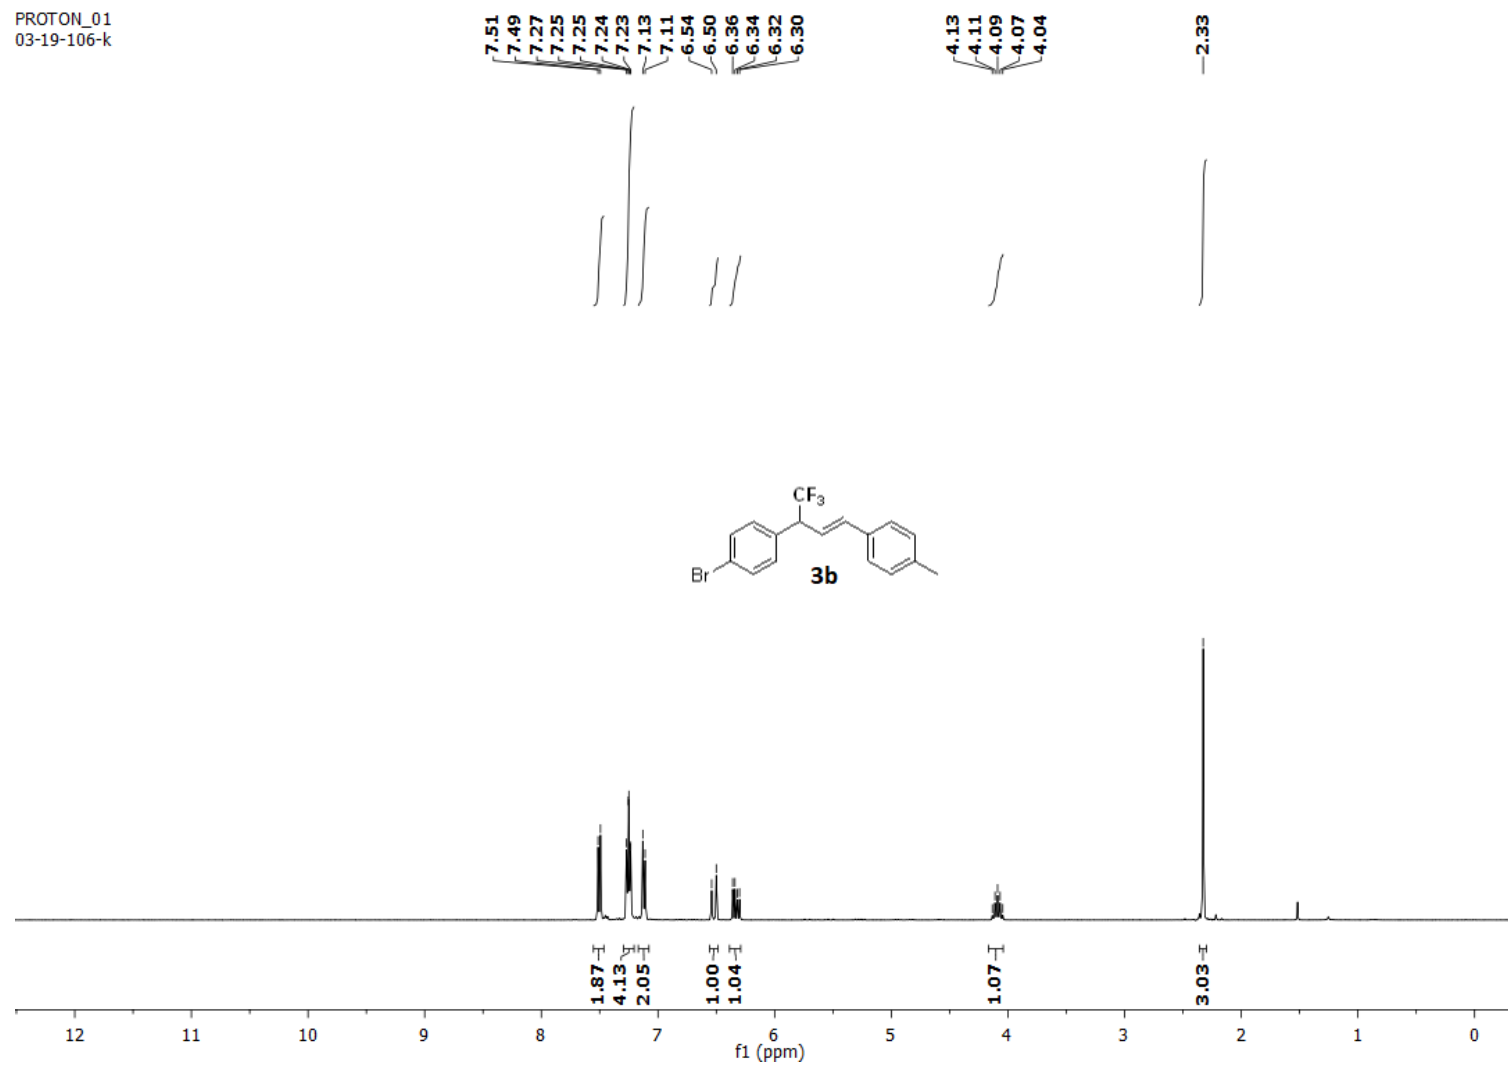

<sup>19</sup>F NMR (376 MHz, CDCl<sub>3</sub>) of 3b

FLUORINE\_01  
03-19-106-k

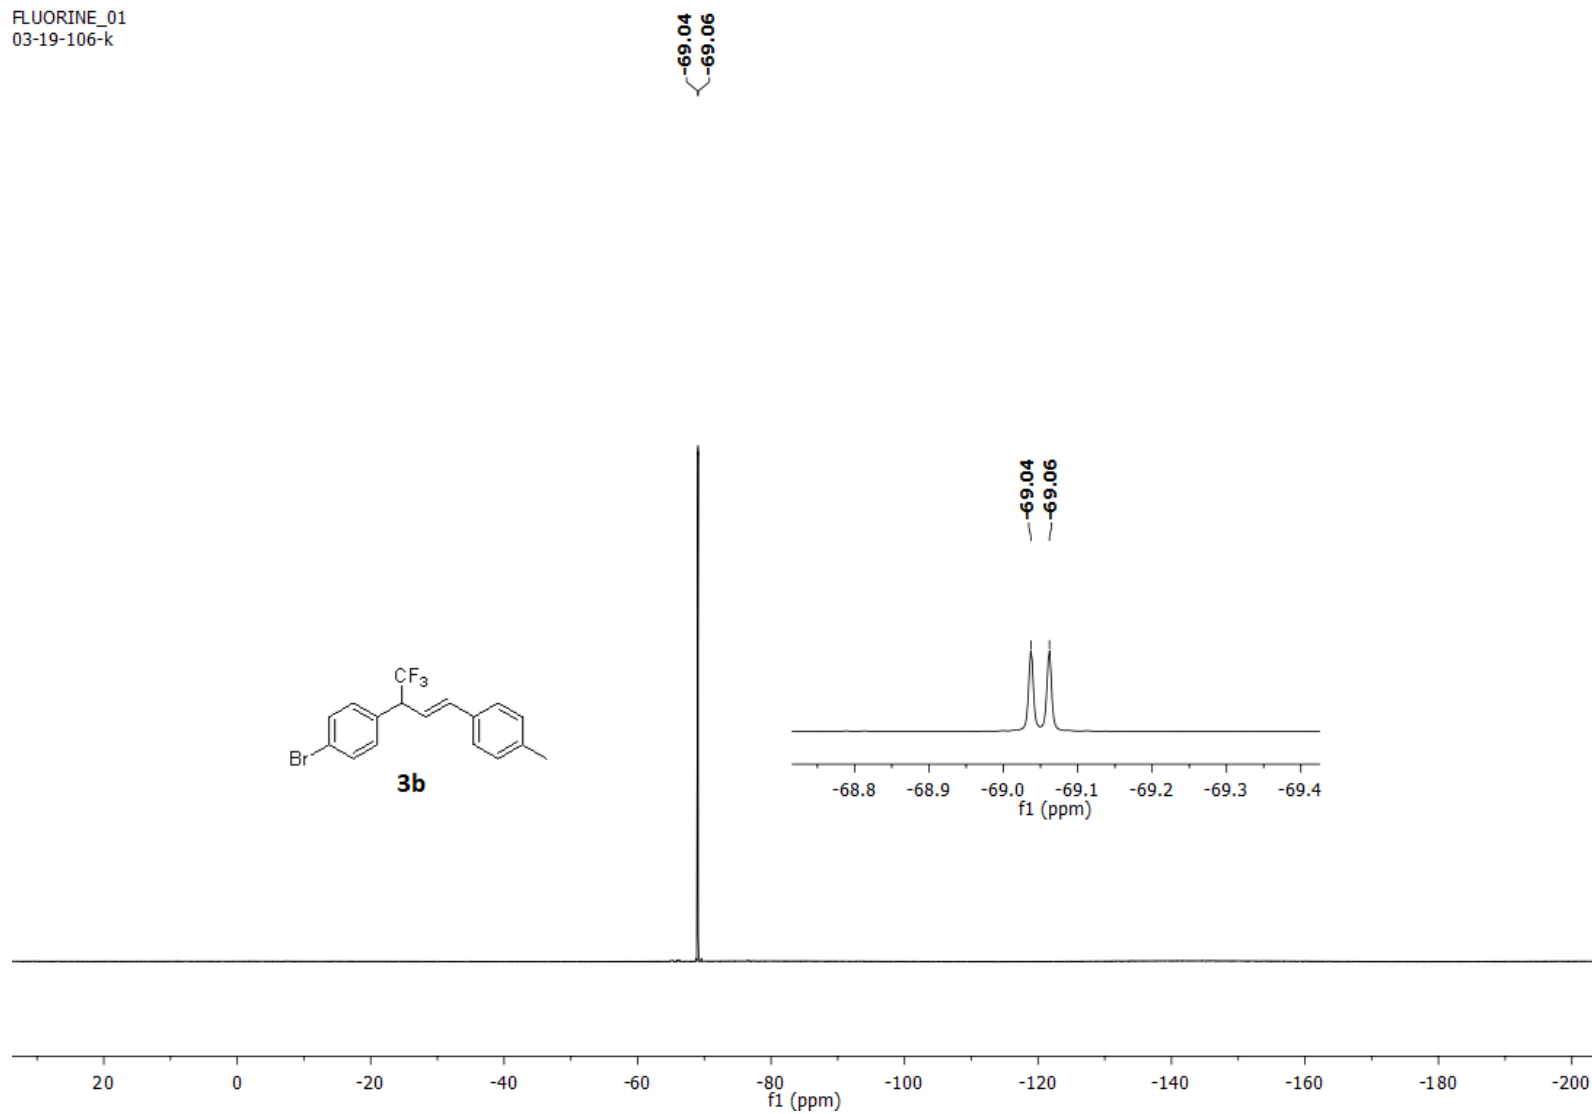

<sup>13</sup>C NMR (100 MHz, CDCl<sub>3</sub>) of 3b

CARBON\_01  
03-24-106-k

138.15  
135.63  
133.72  
133.02  
131.82  
130.53  
129.81  
129.20  
127.02  
126.31  
124.23  
122.25  
121.46  
120.71

53.14  
52.85  
52.57  
52.29

21.10

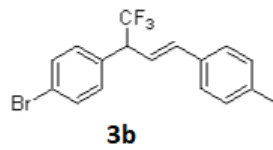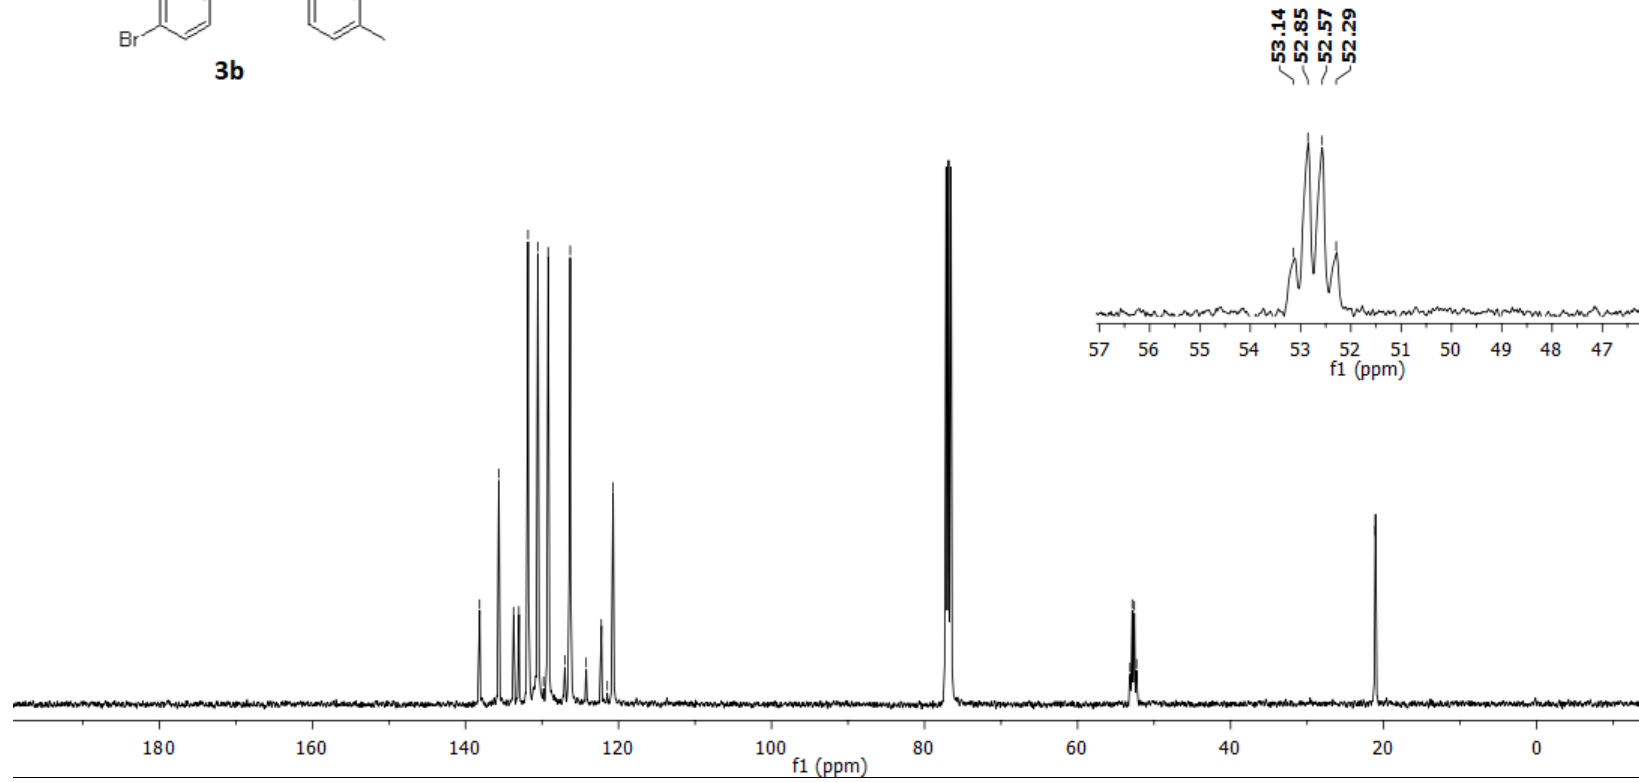

PROTON\_01  
03-20-106-m

<sup>1</sup>H NMR (400 MHz, CDCl<sub>3</sub>) of 3c

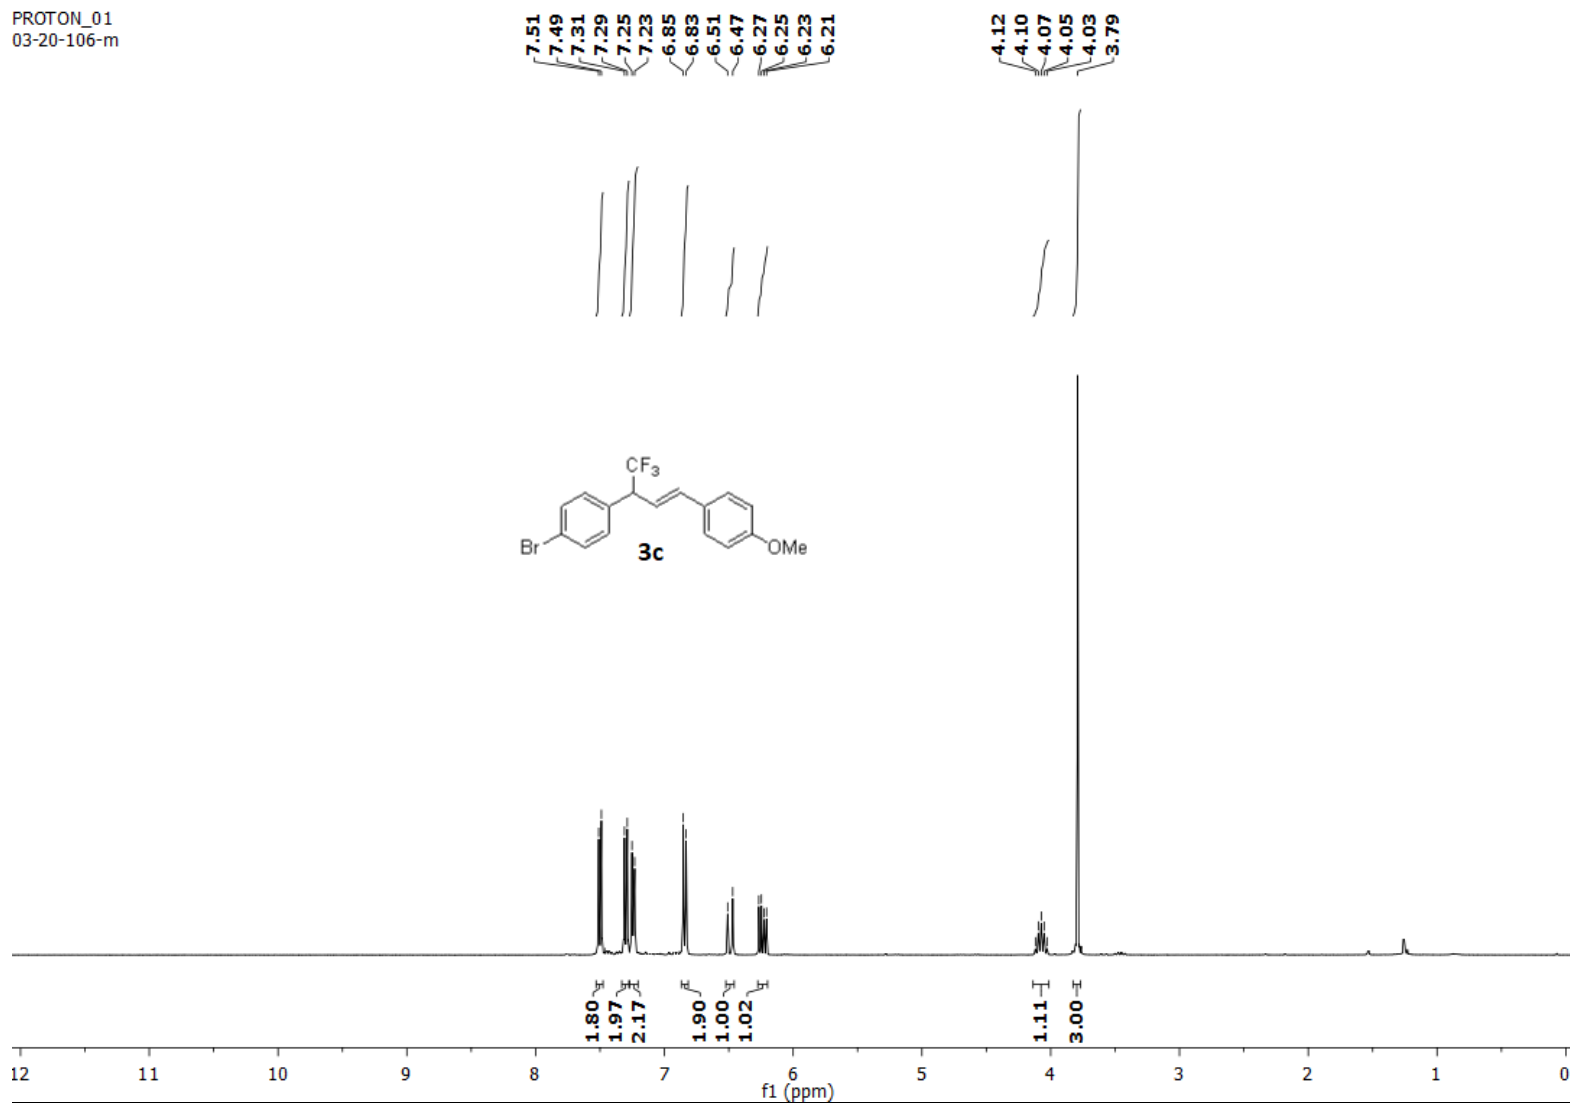

FLUORINE\_01  
03-20-106-m

$^{19}\text{F}$  NMR (376 MHz,  $\text{CDCl}_3$ ) of **3c**

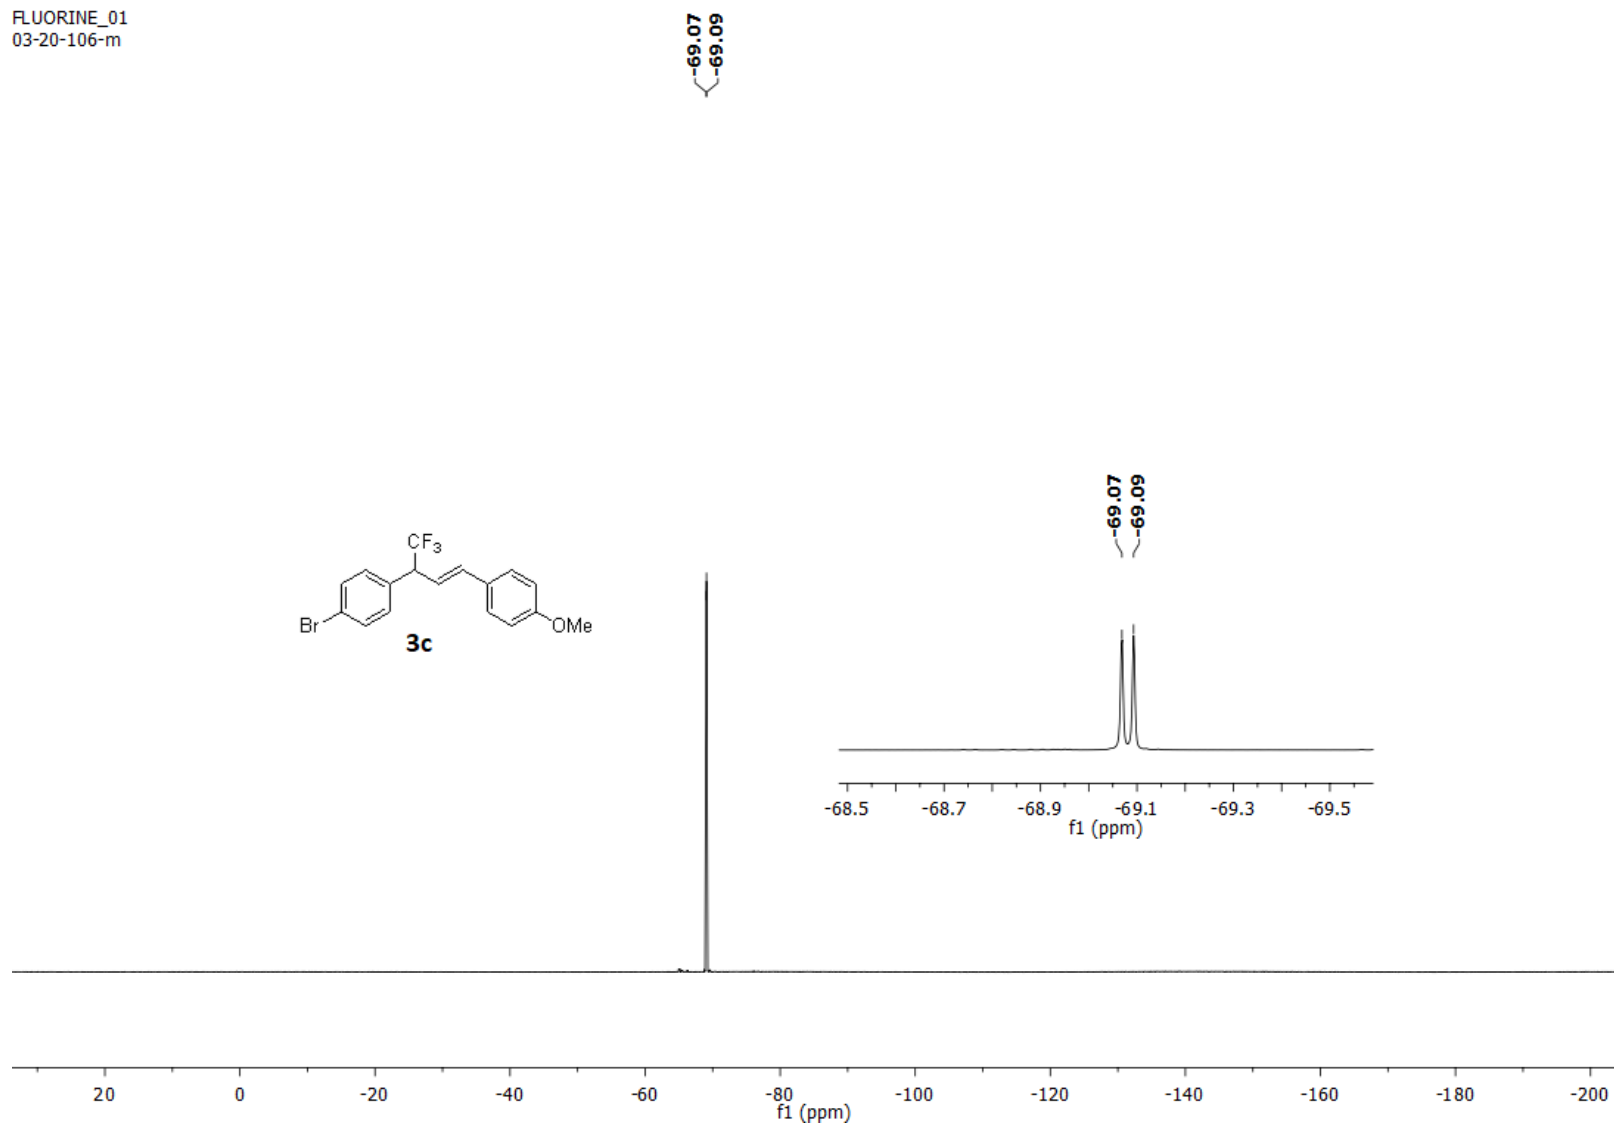



CARBON\_01  
03-25-106-m

<sup>13</sup>C NMR (100 MHz, CDCl<sub>3</sub>) of 3c

—159.65

135.20  
133.86  
131.85  
130.58  
129.91  
128.59  
127.73  
127.09  
124.31  
122.25  
121.50  
119.52  
114.00  
113.94

55.18  
53.19  
52.92  
52.65  
52.37

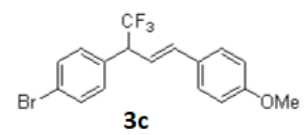

53.19  
52.92  
52.65  
52.37

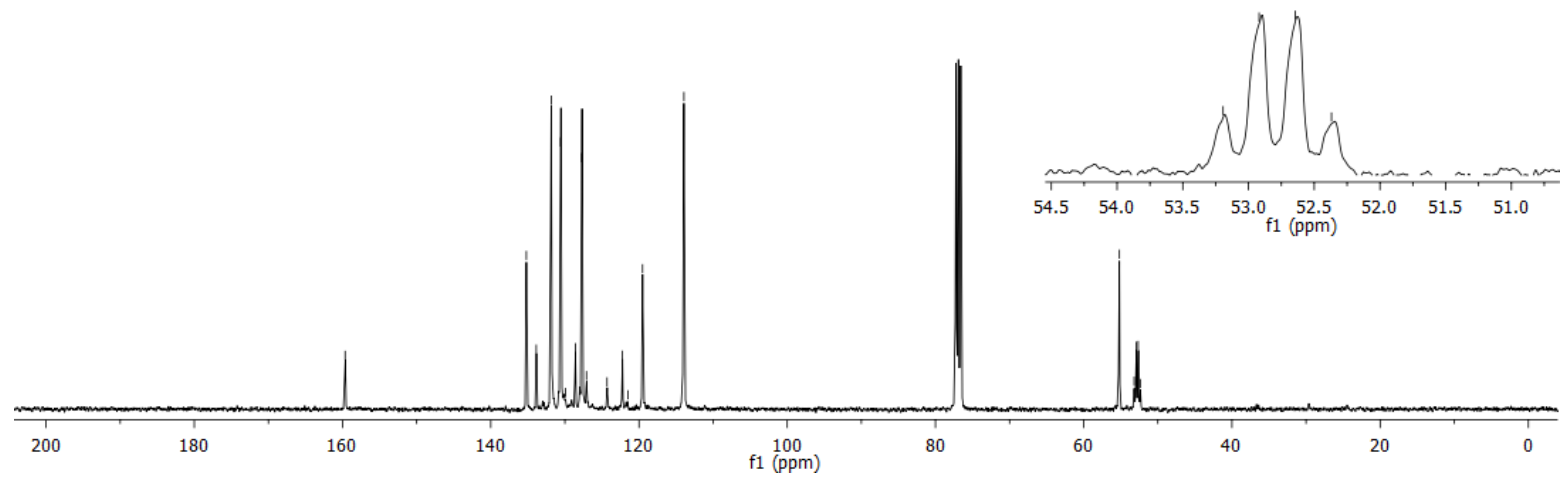

PROTON\_01  
03-30-107-g

$^1\text{H}$  NMR (400 MHz,  $\text{CDCl}_3$ ) of **3d**

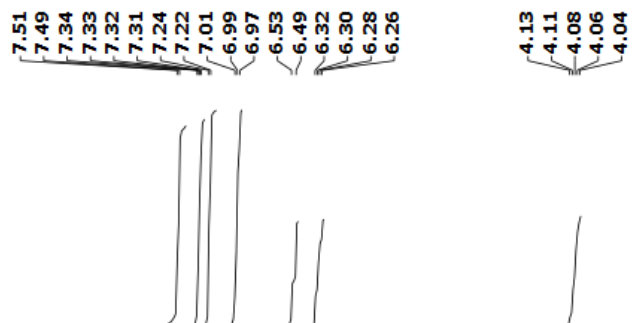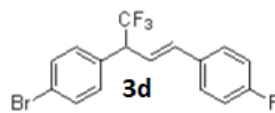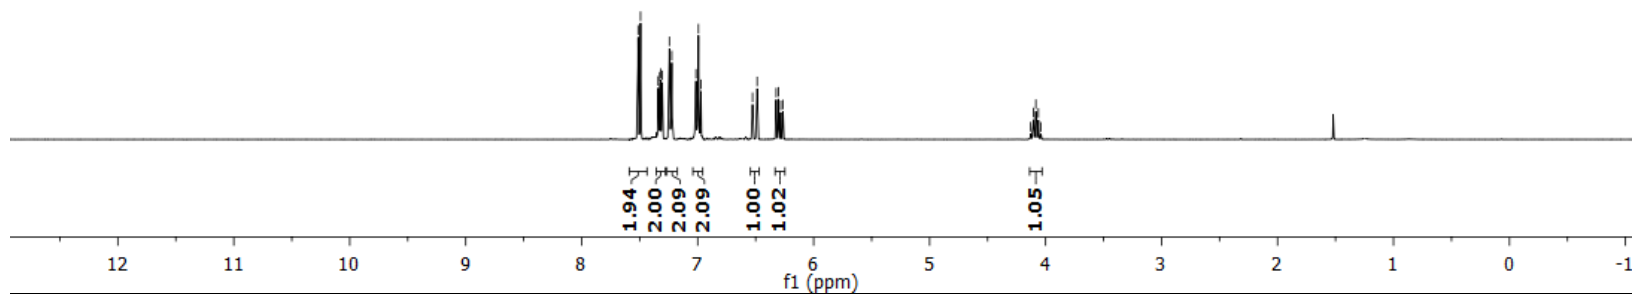

FLUORINE\_01  
03-30-107-g

$^{19}\text{F}$  NMR (376 MHz,  $\text{CDCl}_3$ ) of **3d**

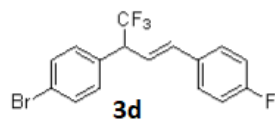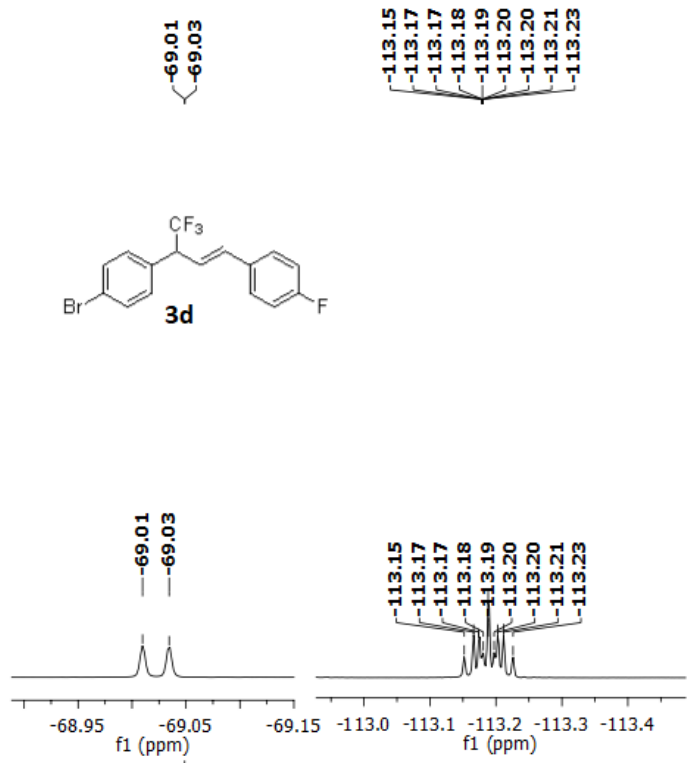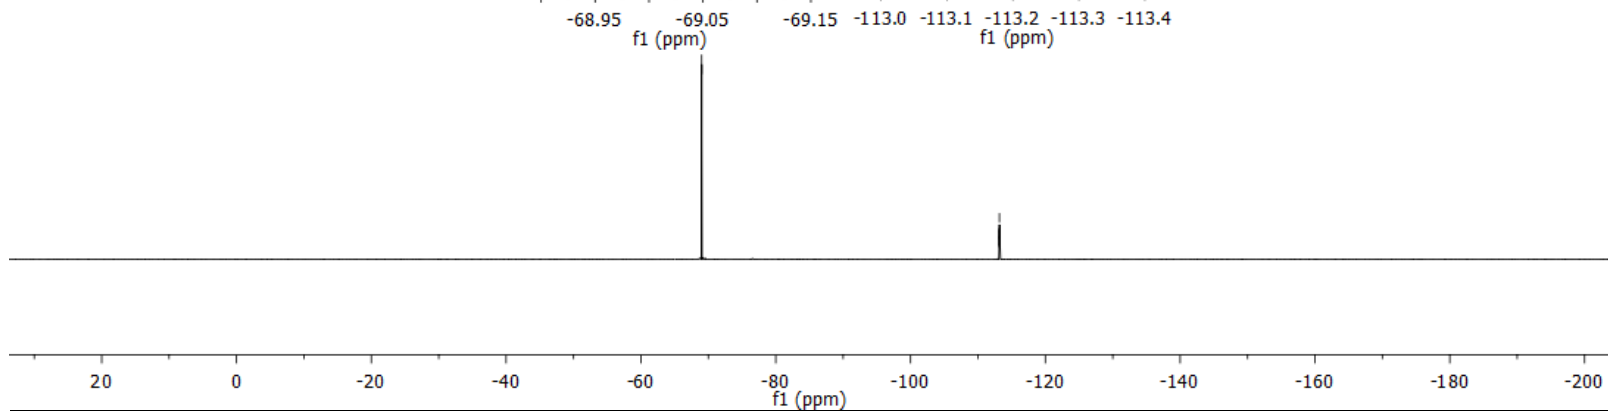

<sup>13</sup>C NMR (100 MHz, CDCl<sub>3</sub>) of 3d

CARBON\_01  
03-31-107-g

163.76  
161.29

134.54  
133.39  
131.85  
131.34  
130.45  
129.69  
128.00  
126.89  
124.11  
122.32  
121.53  
121.53  
121.33  
115.58  
115.53  
115.36  
115.32

53.05  
52.77  
52.50  
52.22

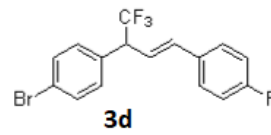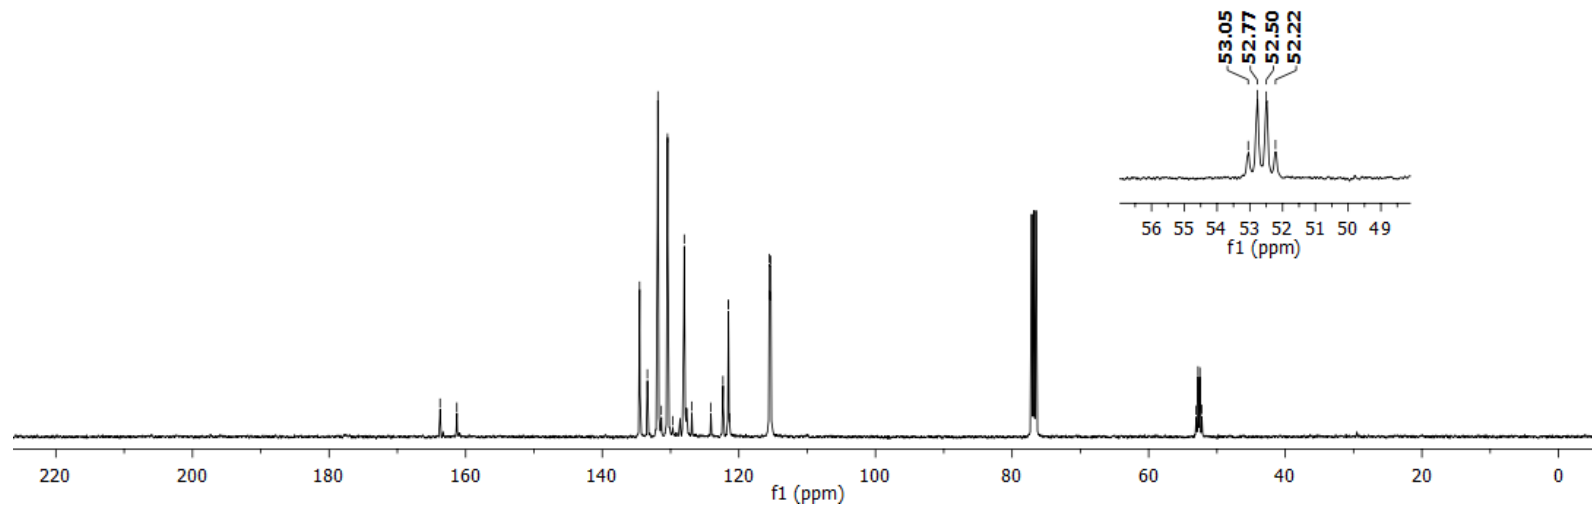

<sup>1</sup>H NMR (400 MHz, CDCl<sub>3</sub>) of 3e

PROTON\_01  
03-30-107-h

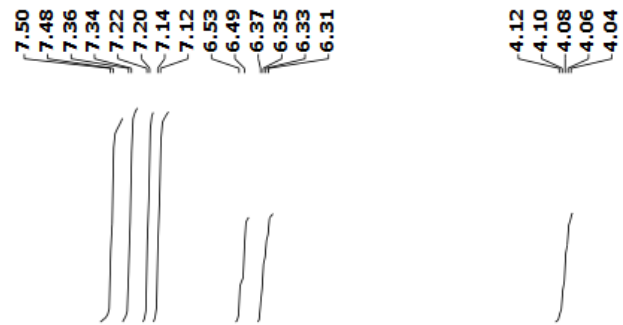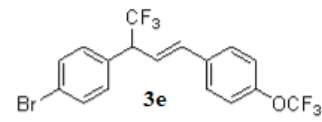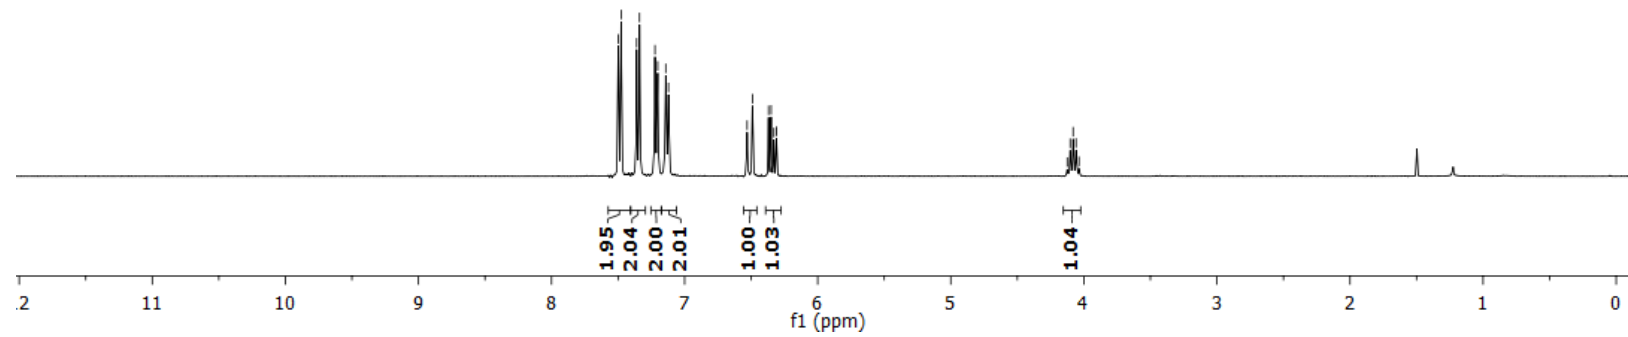

<sup>19</sup>F NMR (376 MHz, CDCl<sub>3</sub>) of 3e

FLUORINE\_01  
03-30-107-h

-57.95  
-69.01  
-69.04

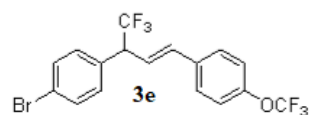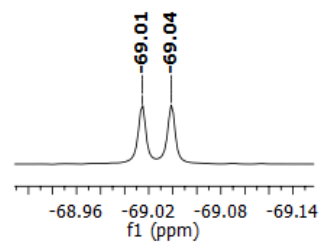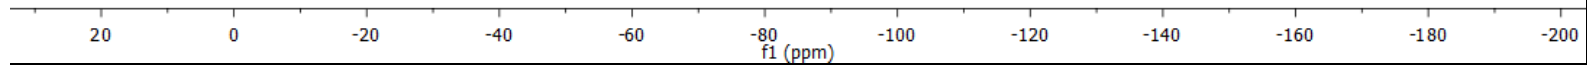

<sup>13</sup>C NMR (100 MHz, CDCl<sub>3</sub>) of 3e

CARBON\_01  
03-30-107-h1

149.01  
134.61  
134.41  
133.36  
132.07  
130.61  
129.79  
127.85  
127.56  
126.99  
124.21  
122.57  
121.68  
121.41  
121.11  
119.12  
116.55

53.20  
52.92  
52.64  
52.36

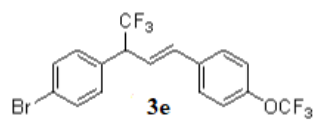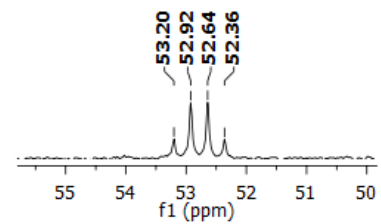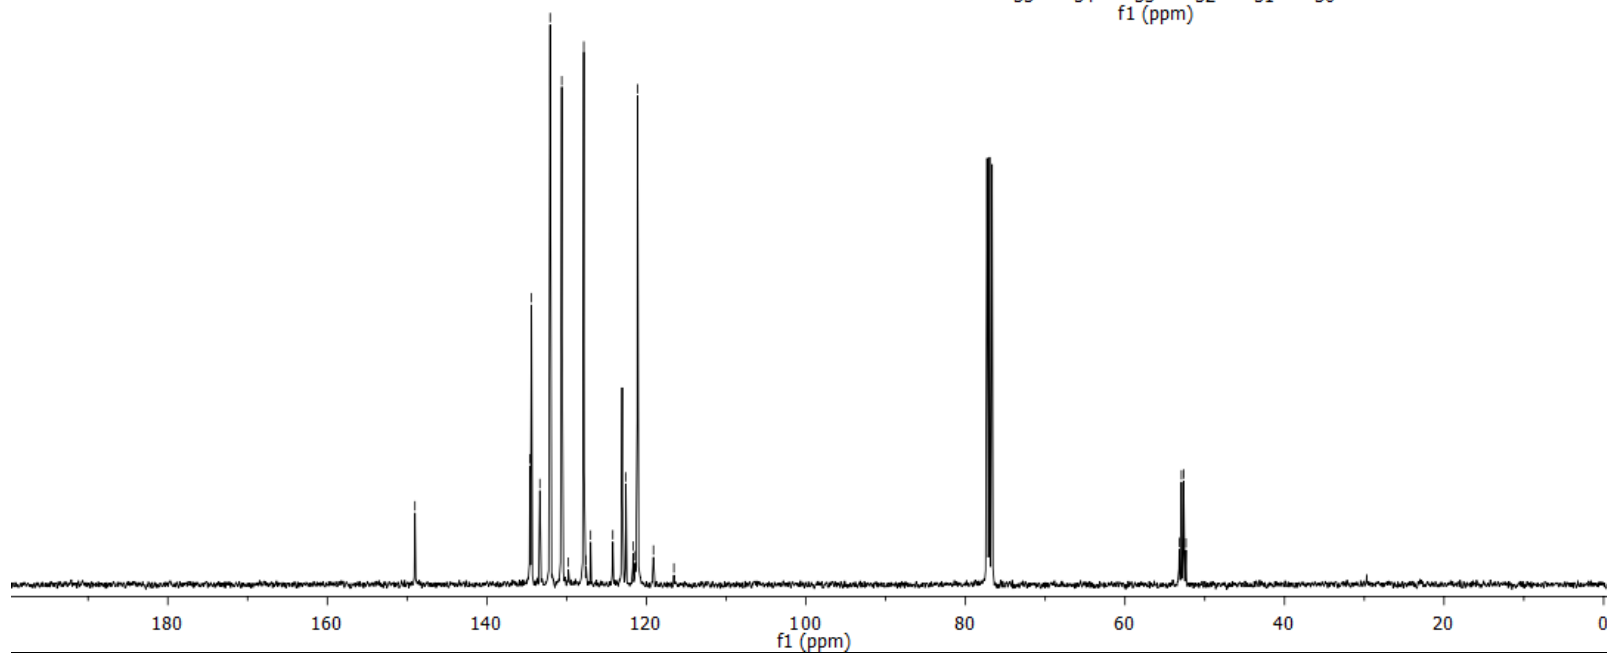

<sup>1</sup>H NMR (400 MHz, CDCl<sub>3</sub>) of 3f

PROTON\_01  
03-28-107-d

7.54  
7.52  
7.36  
7.36  
7.34  
7.34  
7.28  
7.26  
7.24  
7.24  
7.23  
7.22  
7.22  
7.21  
7.20  
7.01  
6.97  
6.41  
6.39  
6.37  
6.35  
4.23  
4.20  
4.18  
4.16  
4.14

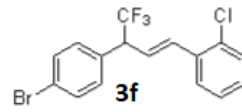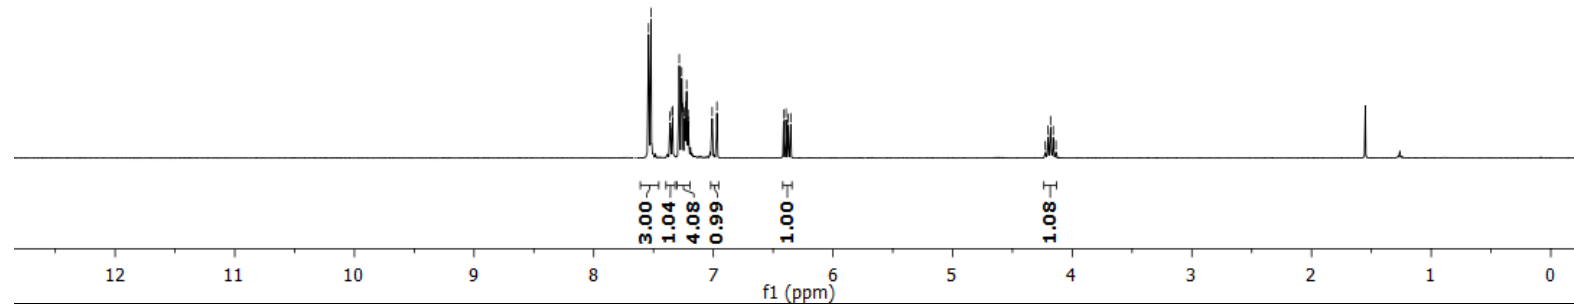



FLUORINE\_01  
03-28-107-d

$^{19}\text{F}$  NMR (376 MHz,  $\text{CDCl}_3$ ) of **3f**

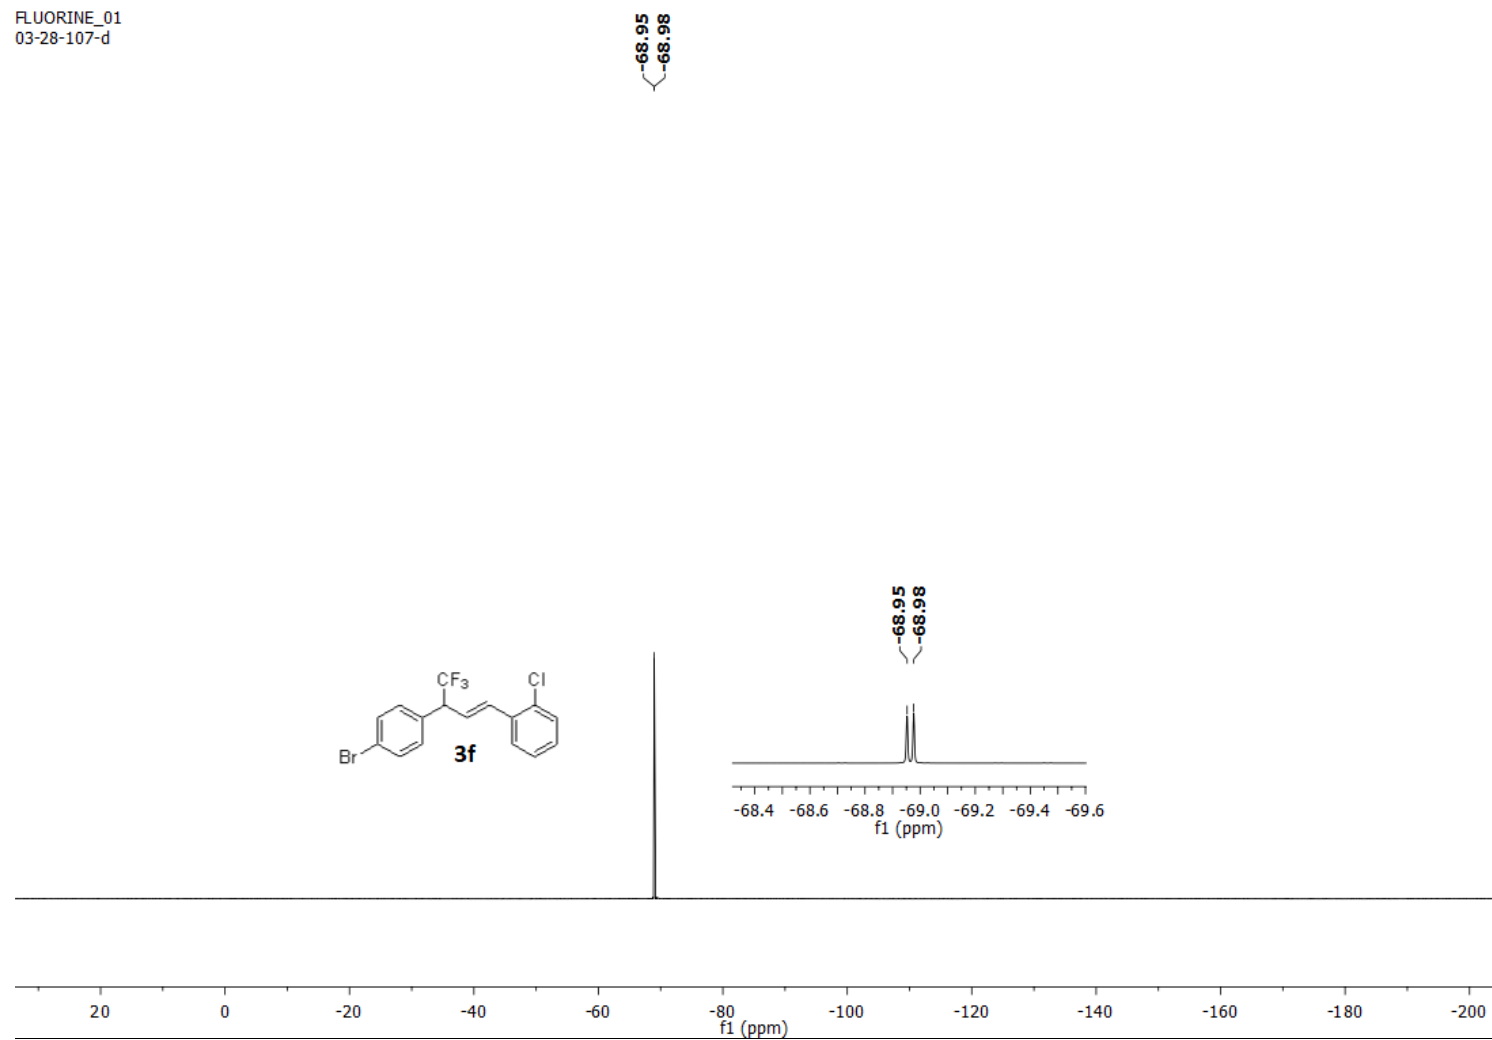

CARBON\_01  
03-28-107-d0

$^{13}\text{C}$  NMR (100 MHz,  $\text{CDCl}_3$ ) of **3f**

134.12  
133.37  
133.24  
132.30  
132.04  
132.02  
130.62  
129.74  
129.31  
128.61  
126.92  
126.27  
124.67  
124.17  
122.54  
121.37

53.34  
53.06  
52.78  
52.50

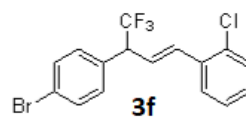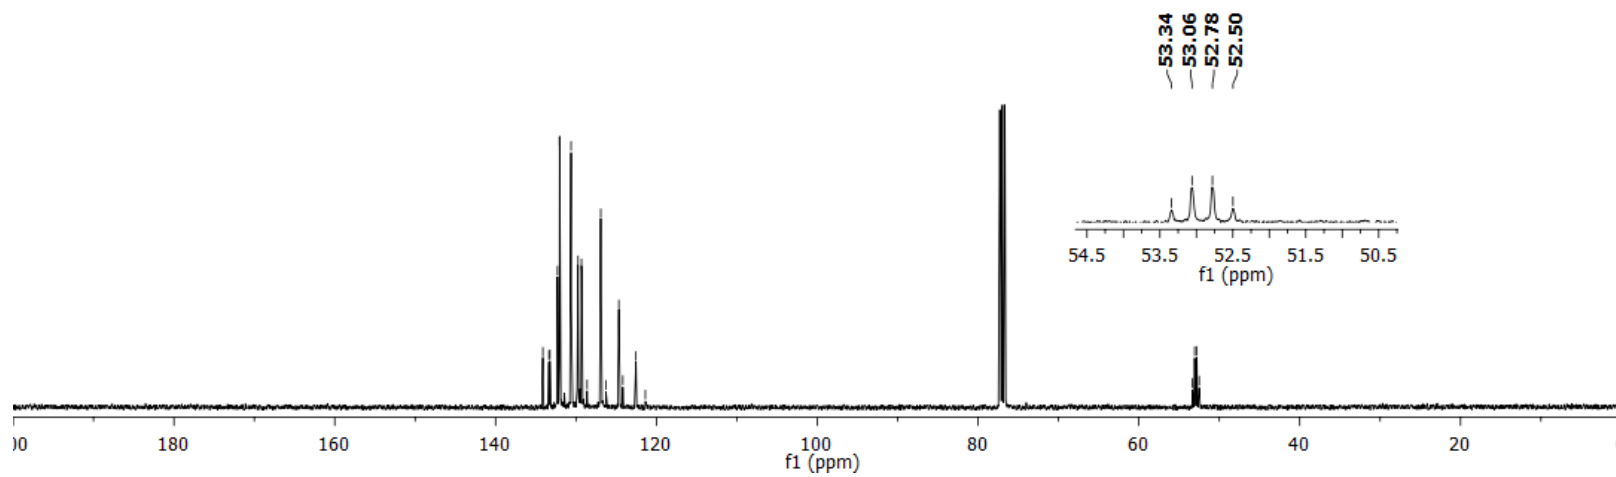

PROTON\_01  
03-31-108-d

<sup>1</sup>H NMR (400 MHz, CDCl<sub>3</sub>) of 3g

7.33 7.30 7.04 7.03 7.02 7.01 7.01 6.25 6.21 6.20 6.16 3.94 3.92 3.91 3.90 3.89 3.89 3.88 3.87 3.86 3.85

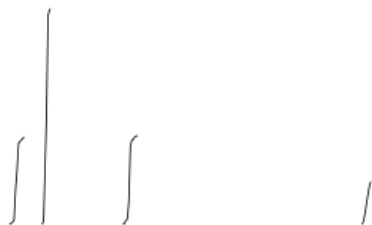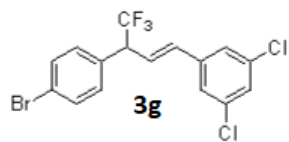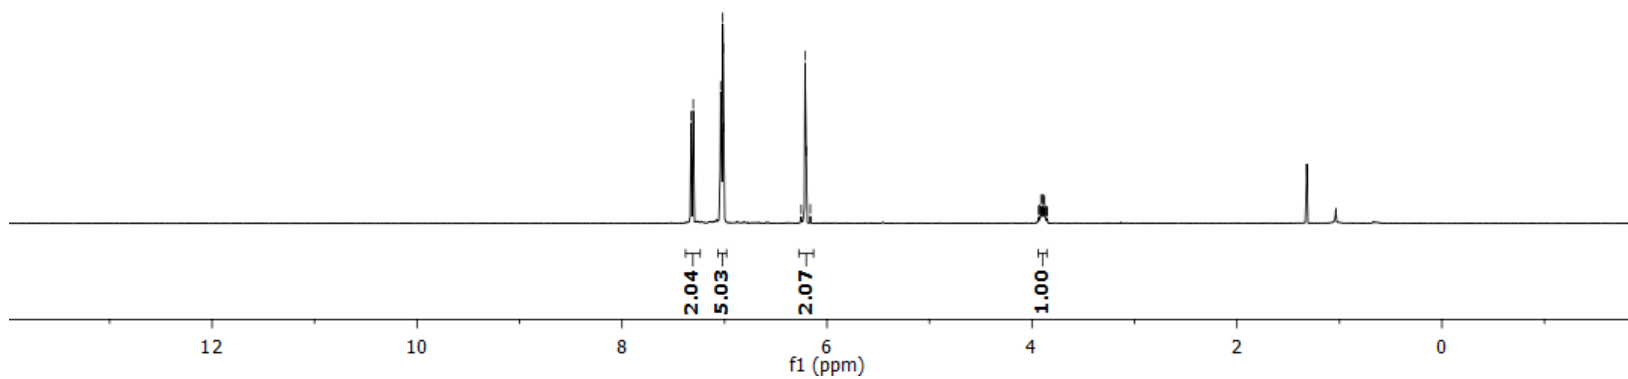

FLUORINE\_01  
03-31-108-d

$^{19}\text{F}$  NMR (376 MHz,  $\text{CDCl}_3$ ) of **3g**

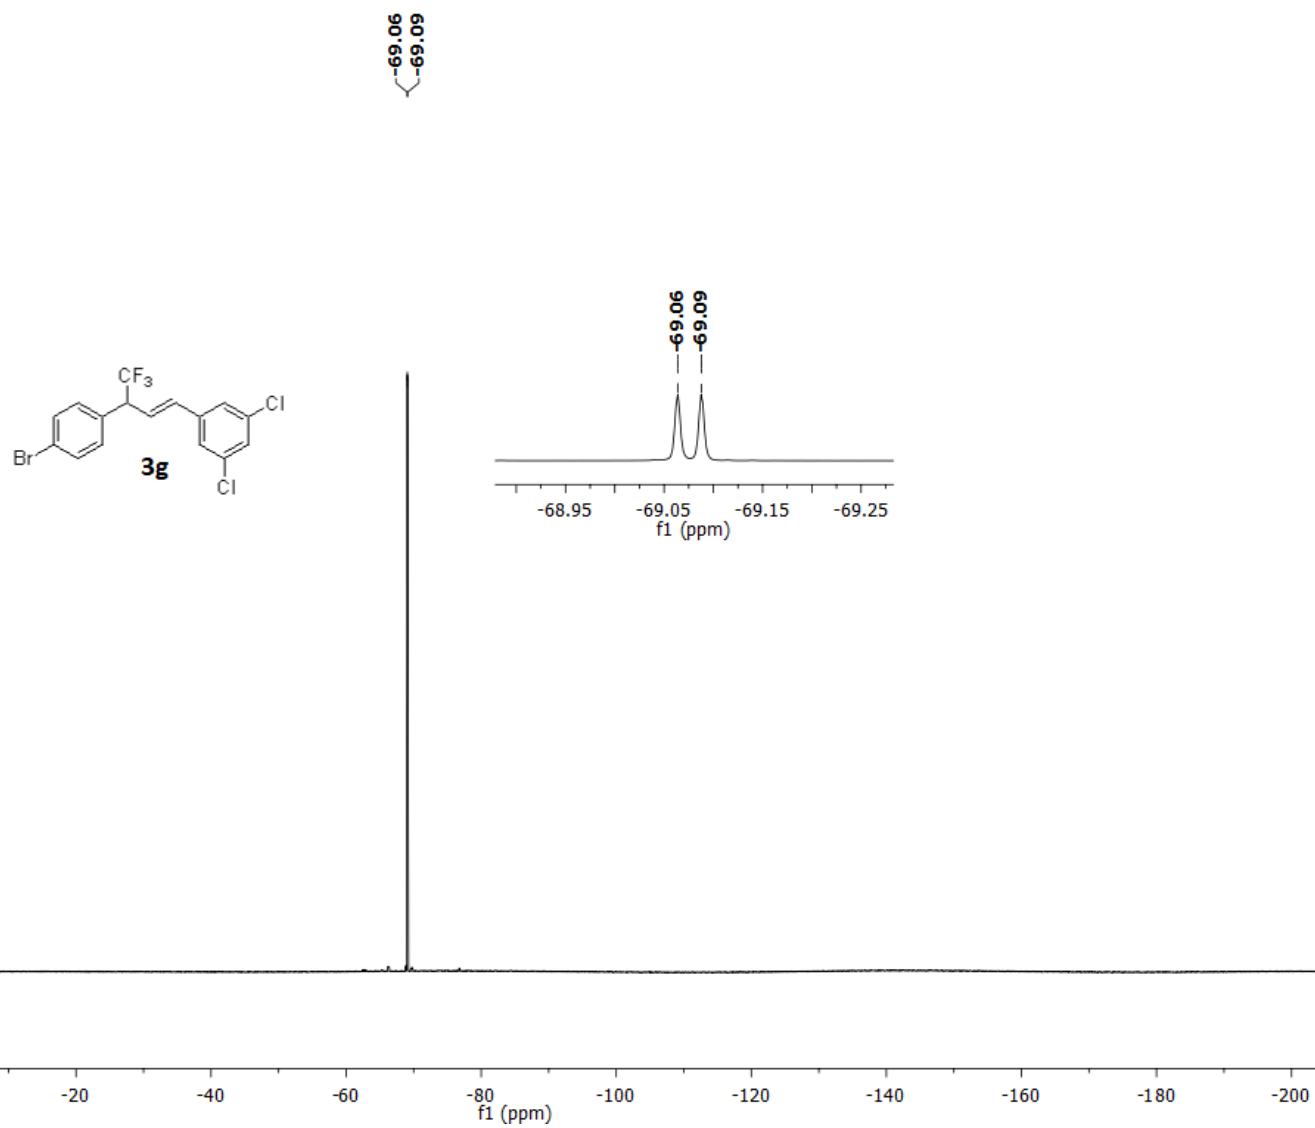

<sup>13</sup>C NMR (100 MHz, CDCl<sub>3</sub>) of 3g

CARBON\_01  
04-01-108-d

138.70  
135.19  
133.31  
132.81  
132.05  
130.52  
129.50  
128.00  
126.74  
124.97  
124.81  
123.95  
122.66  
121.14

53.03  
52.73  
52.46  
52.17

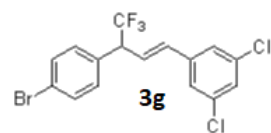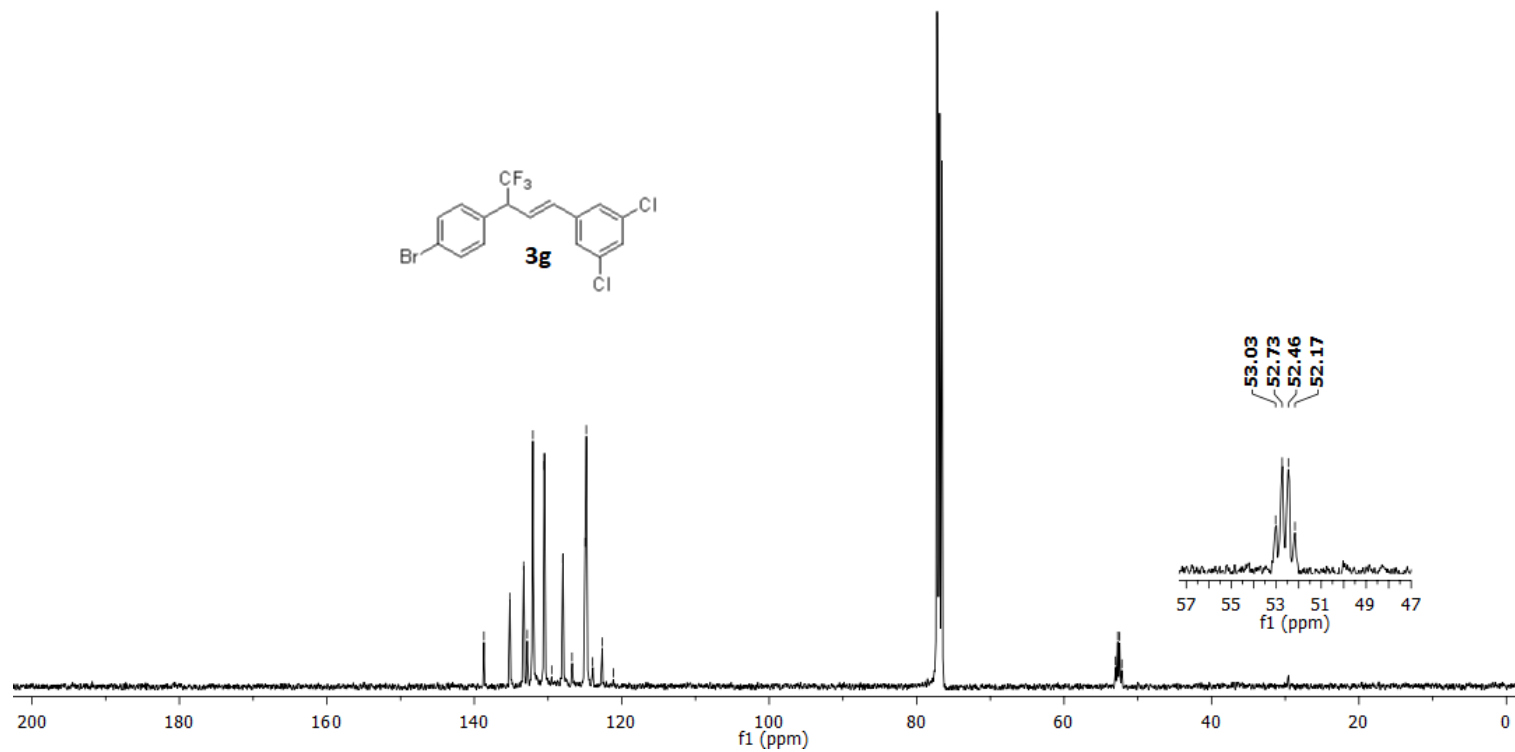

<sup>1</sup>H NMR (400 MHz, CDCl<sub>3</sub>) of 3h

PROTON\_01  
04-23-107-f

7.55  
7.53  
7.38  
7.27  
7.26  
6.54  
6.50  
6.45  
6.43  
6.41  
6.39  
4.17  
4.15  
4.13  
4.11  
4.09  
-1.56

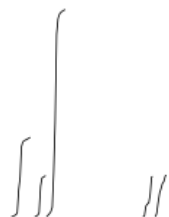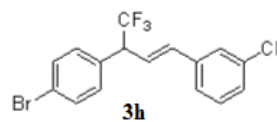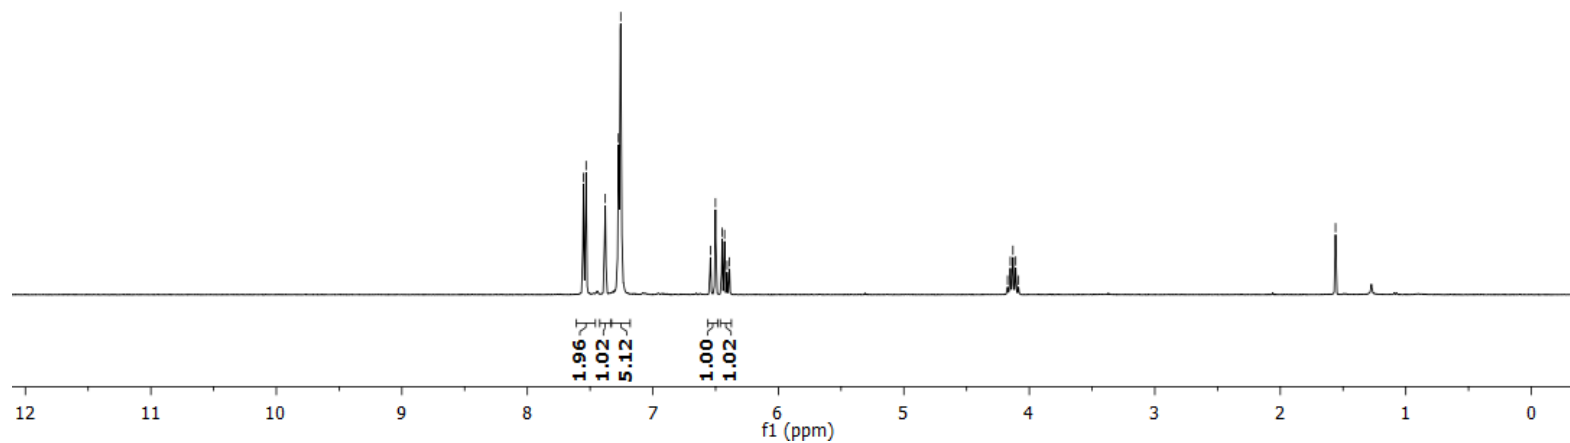

FLUORINE\_01  
04-23-107-f

$^{19}\text{F}$  NMR (376 MHz,  $\text{CDCl}_3$ ) of **3h**

-69.05  
-69.07

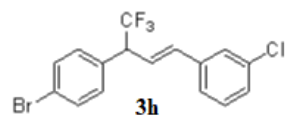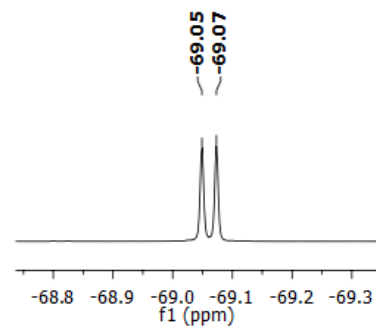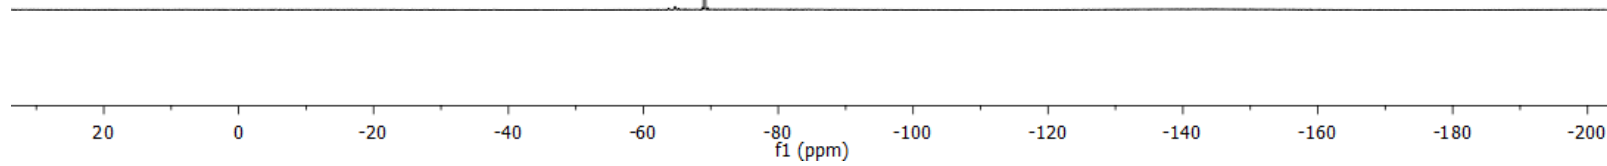

<sup>13</sup>C NMR (100 MHz, CDCl<sub>3</sub>) of 3h

CARBON\_02  
04-23-107-f

137.50  
134.42  
134.37  
133.09  
131.88  
130.42  
129.67  
128.07  
126.77  
126.23  
124.60  
123.97  
123.33  
122.39  
121.17

52.99  
52.70  
52.41  
52.14

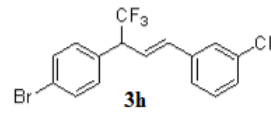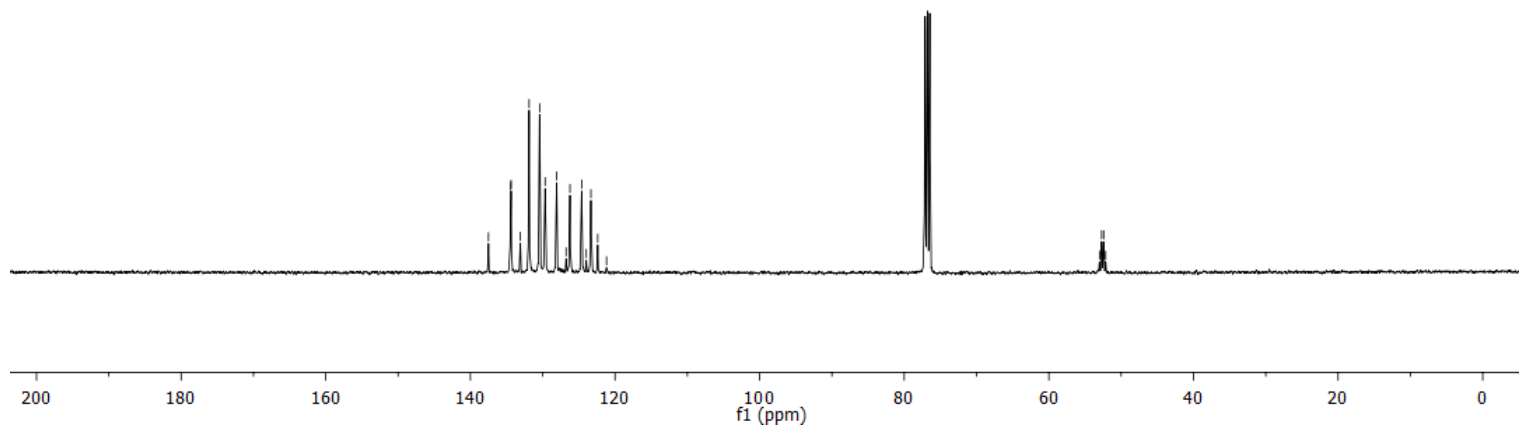



PROTON\_01  
03-30-107-k

$^1\text{H}$  NMR (400 MHz,  $\text{CDCl}_3$ ) of **3i**

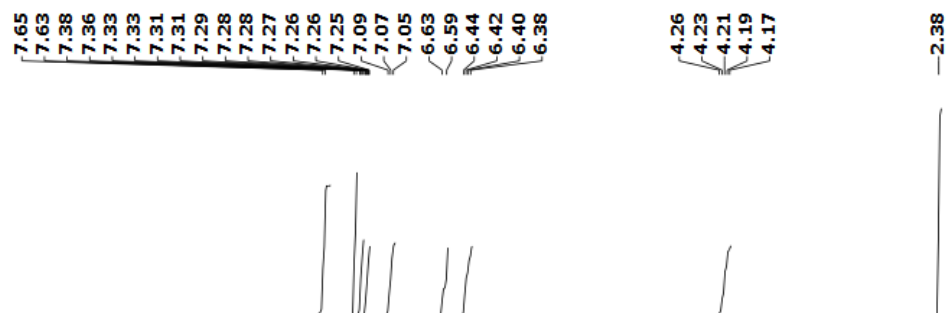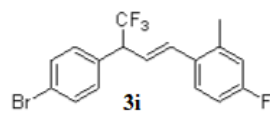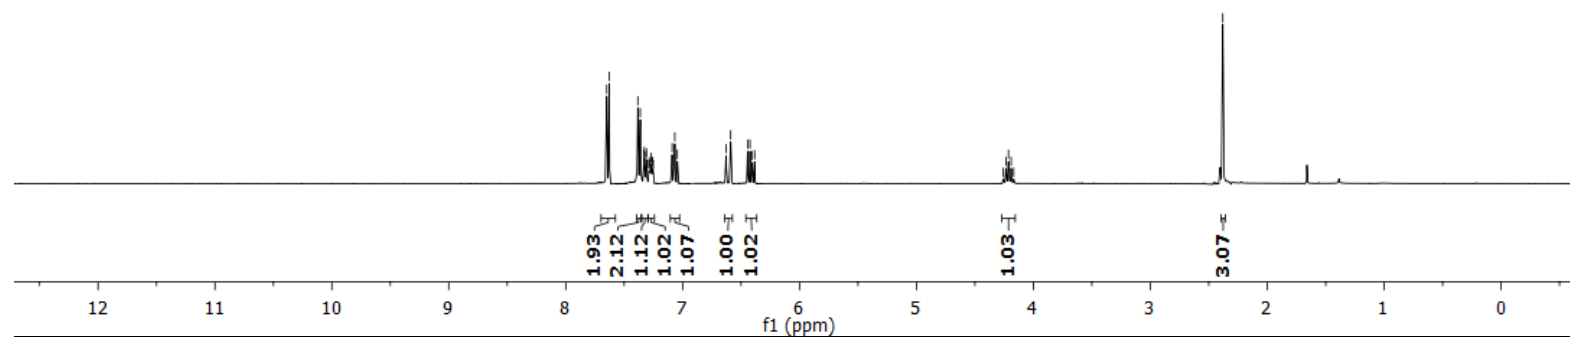

FLUORINE\_01  
03-30-107-k

$^{19}\text{F}$  NMR (376 MHz,  $\text{CDCl}_3$ ) of **3i**

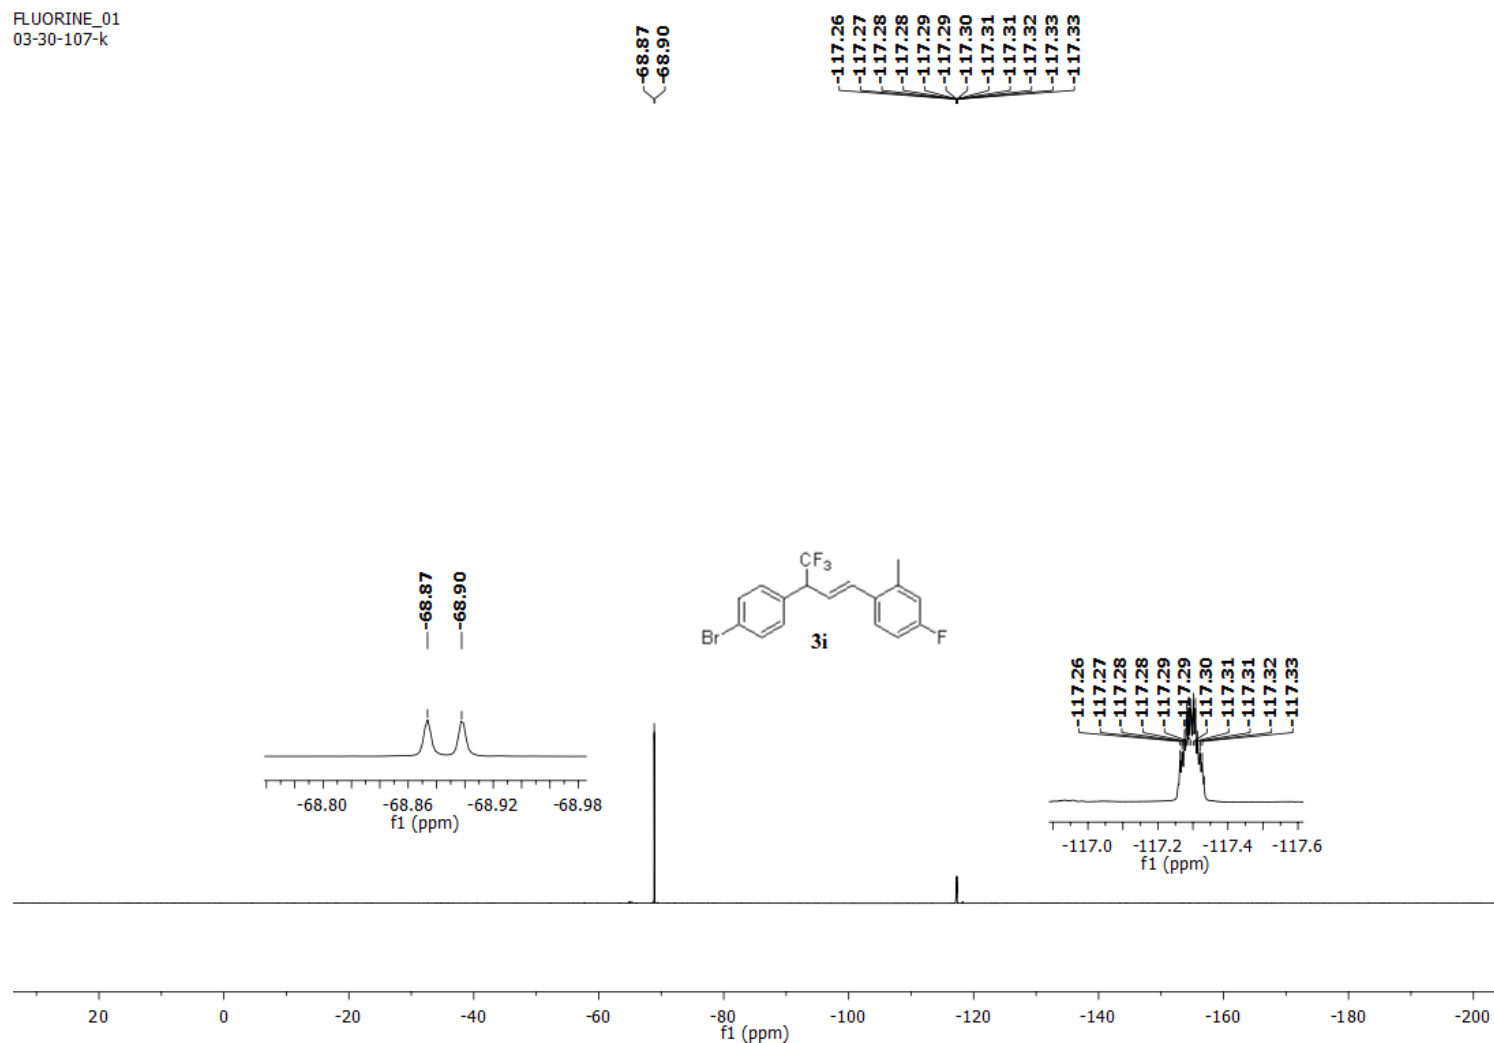

<sup>13</sup>C NMR (100 MHz, CDCl<sub>3</sub>) of **3i**

CARBON\_01  
03-31-107-k

162.65  
160.19  
135.05  
133.80  
132.15  
131.90  
130.76  
130.02  
129.70  
129.65  
127.24  
125.74  
125.66  
125.32  
125.14  
124.45  
122.58  
121.65  
121.46  
115.45  
115.23

53.37  
53.09  
52.81  
52.53

14.63

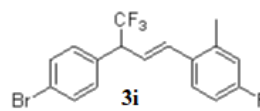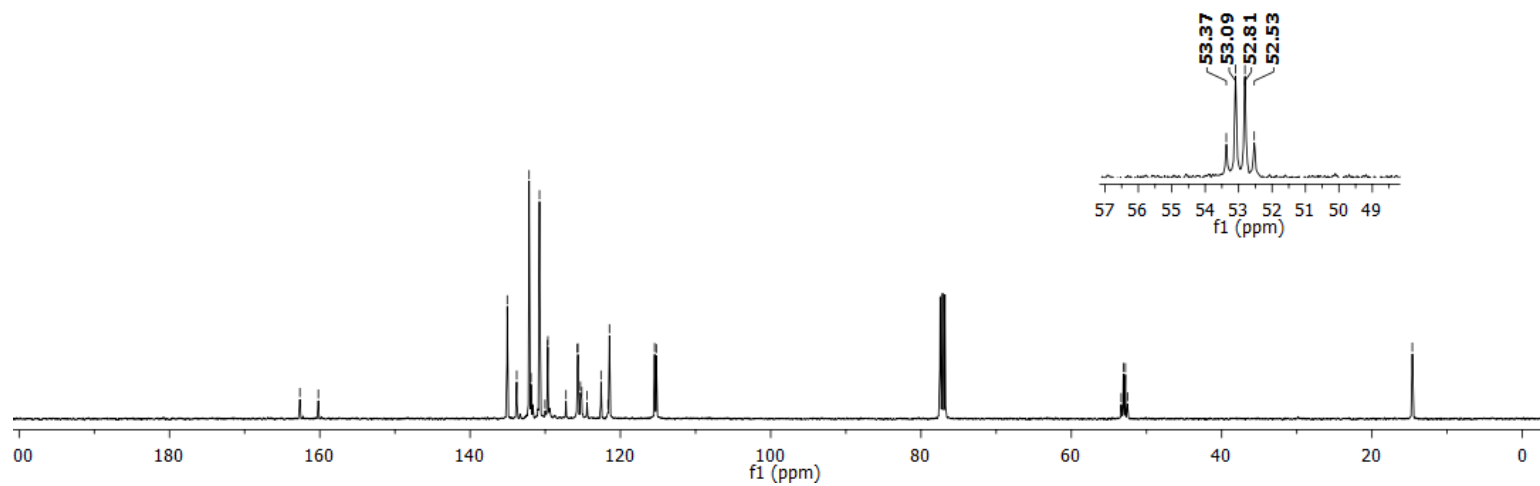

PROTON\_01  
05-07-110-b2

<sup>1</sup>H NMR (400 MHz, CDCl<sub>3</sub>) of 3j

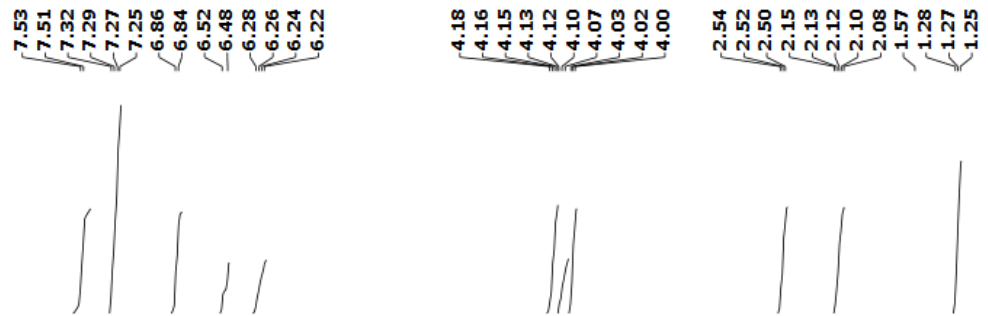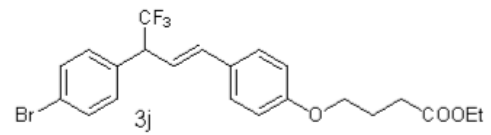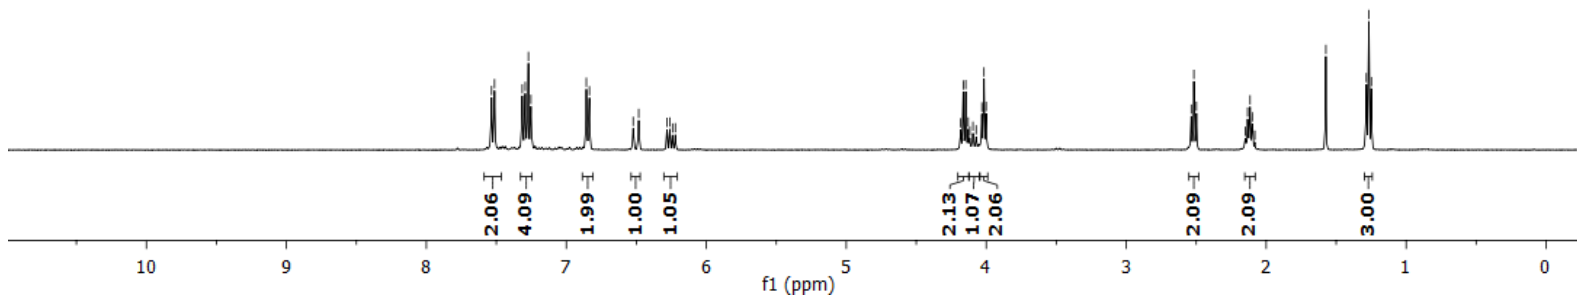

FLUORINE\_01  
05-07-110-b2

<sup>19</sup>F NMR (376 MHz, CDCl<sub>3</sub>) of 3j

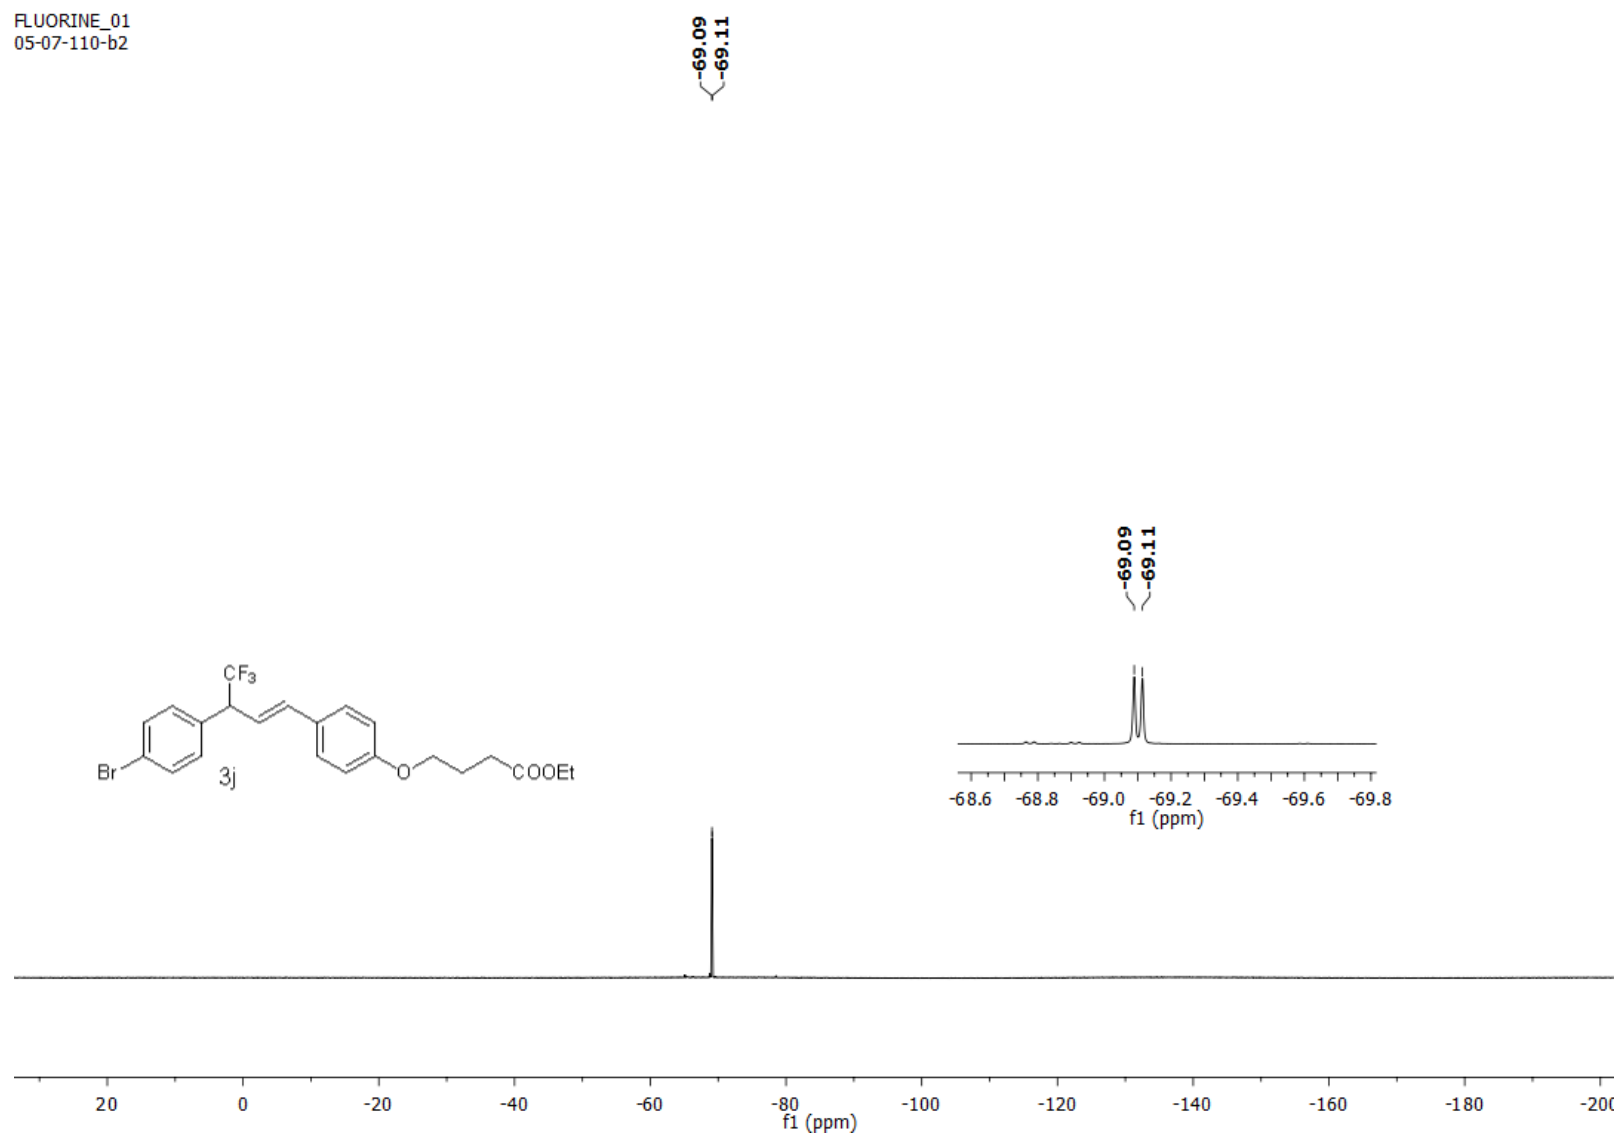

CARBON\_01  
05-19-110-b

$^{13}\text{C}$  NMR (100 MHz,  $\text{CDCl}_3$ ) of 3j

—173.28 —159.12 —135.43 —134.07 —132.08 —130.78 —130.09 —128.86 —127.92 —127.31 —124.52 —122.46 —121.73 —119.76 —114.73 —66.92 —60.59 —53.41 —53.13 —52.85 —52.58 —30.88 —24.71 —14.35

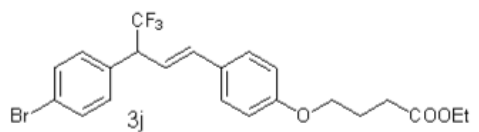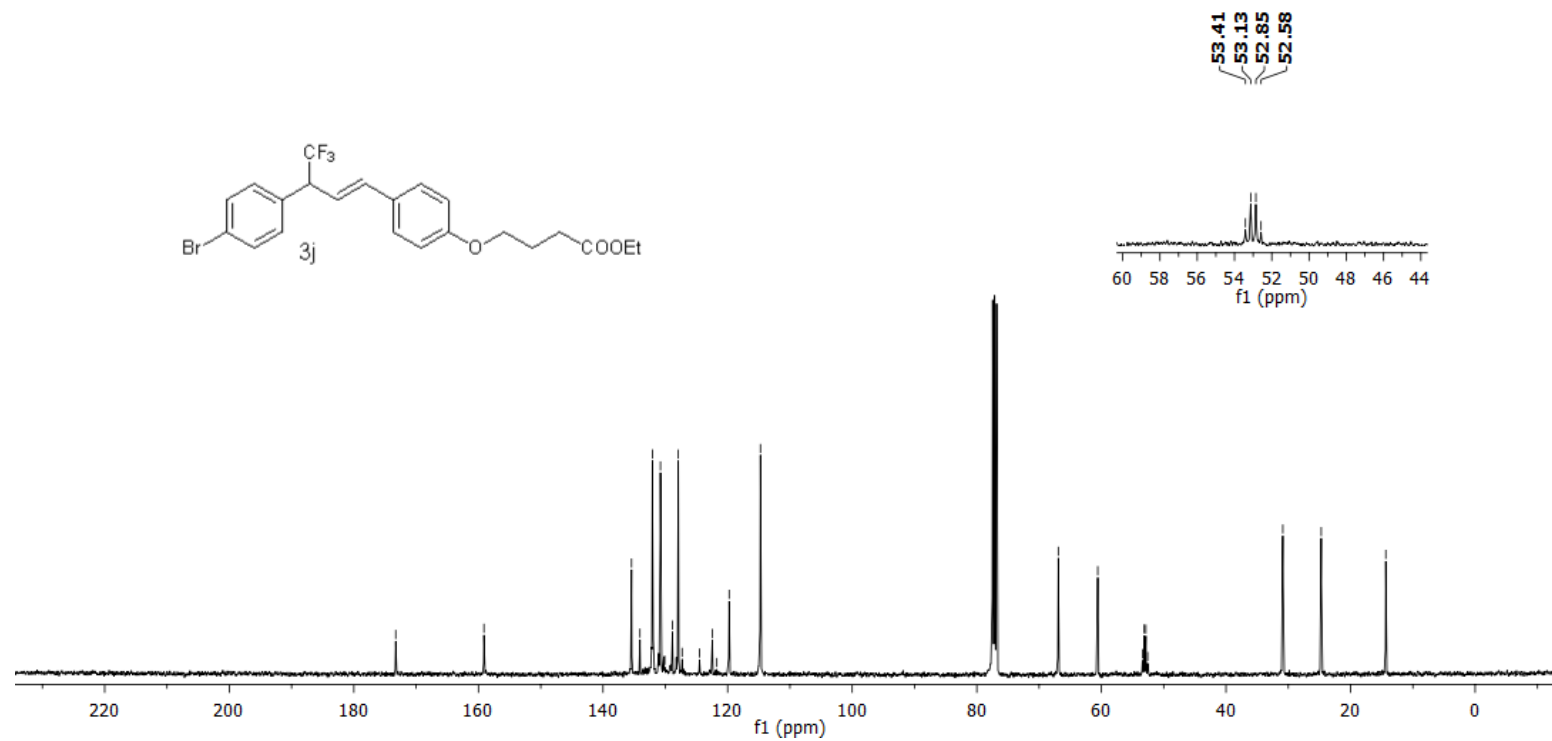

<sup>1</sup>H NMR (400 MHz, CDCl<sub>3</sub>) of 3k

PROTON\_01  
03-31-107-m

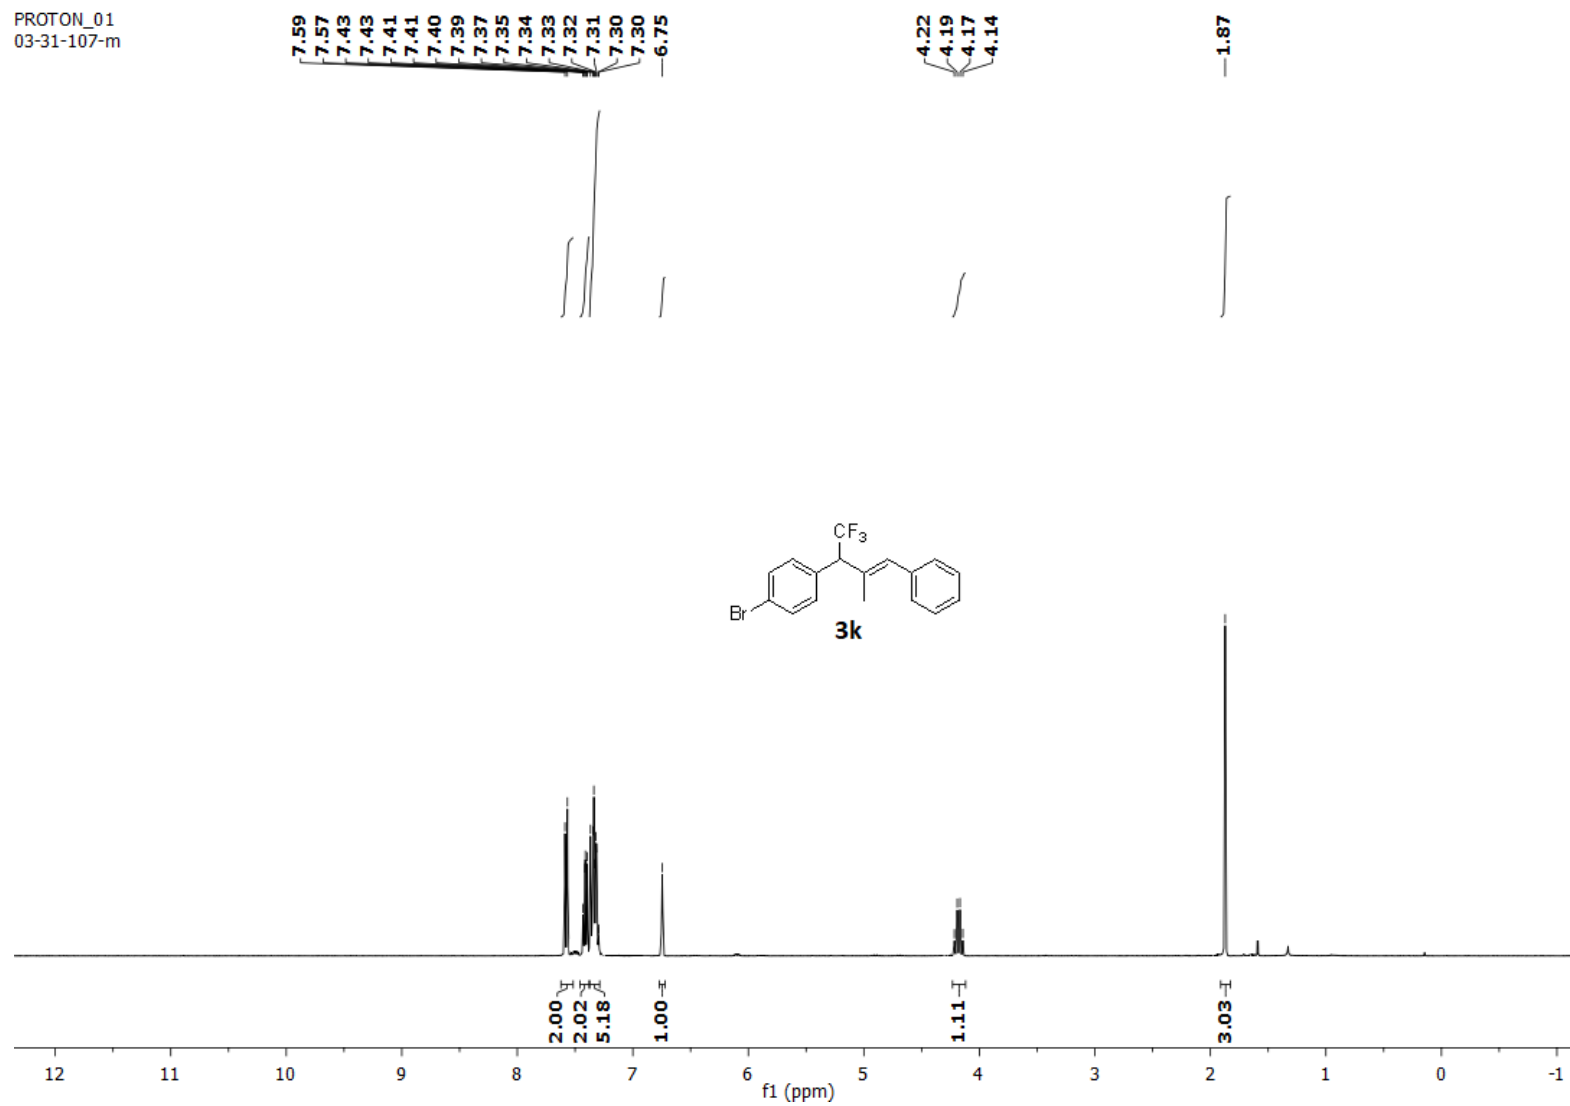

FLUORINE\_01  
03-31-107-m

<sup>19</sup>F NMR (376 MHz, CDCl<sub>3</sub>) of 3k

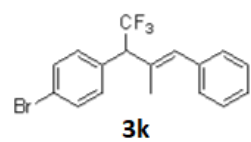

-64.91  
-64.93

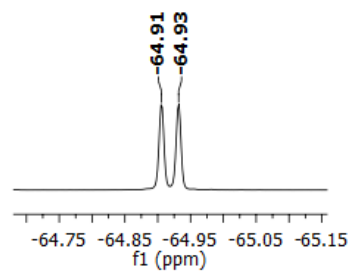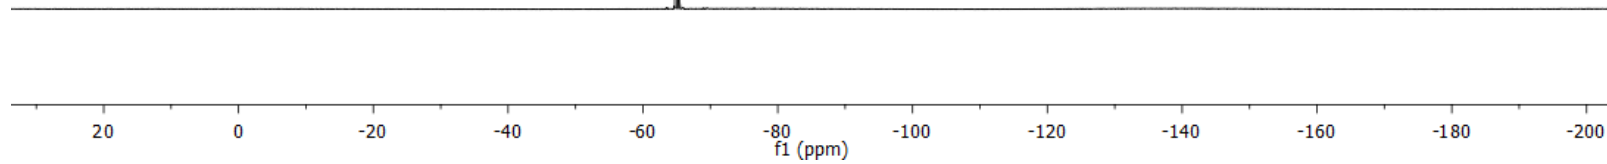



<sup>13</sup>C NMR (100 MHz, CDCl<sub>3</sub>) of 3k

CARBON\_01  
03-31-107-m

136.80  
133.17  
131.78  
131.76  
131.52  
131.03  
130.57  
130.04  
128.94  
128.10  
127.23  
126.93  
124.47  
122.12  
121.63

58.27  
58.00  
57.73  
57.46

16.66

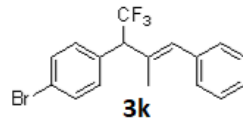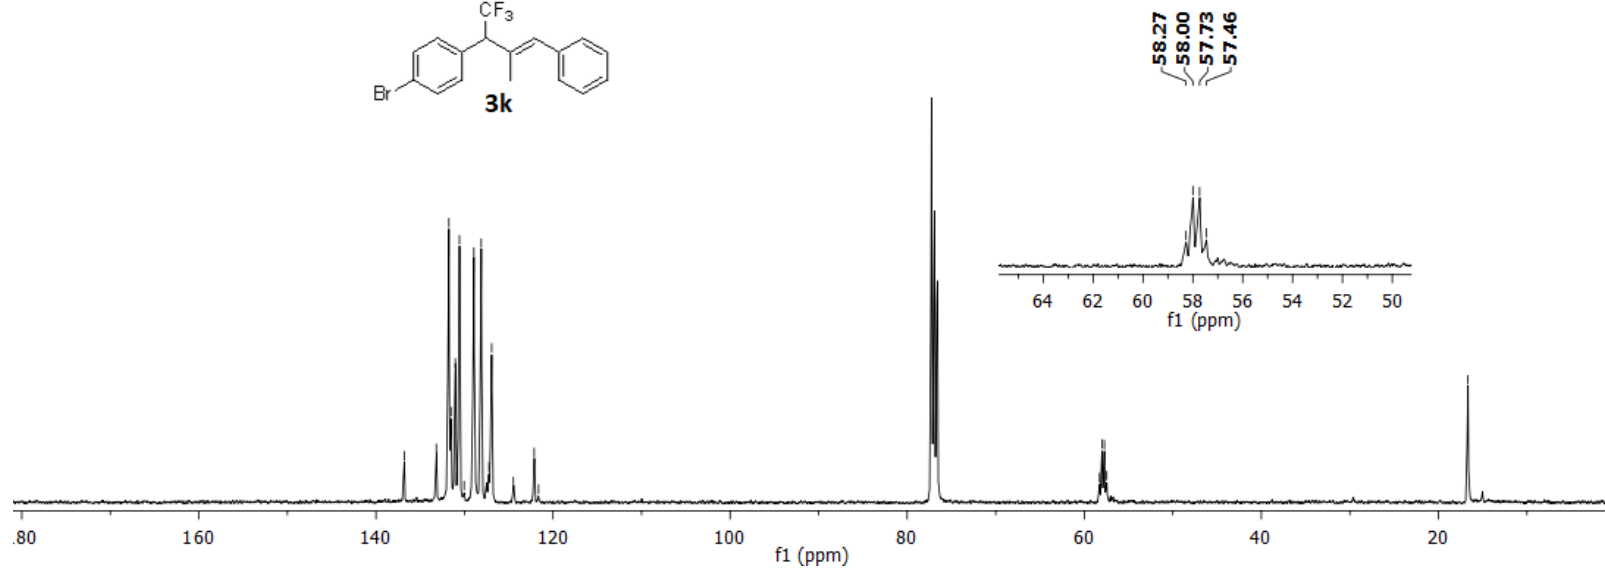

PROTON\_01  
03-29-107-e

<sup>1</sup>H NMR (400 MHz, CDCl<sub>3</sub>) of 31

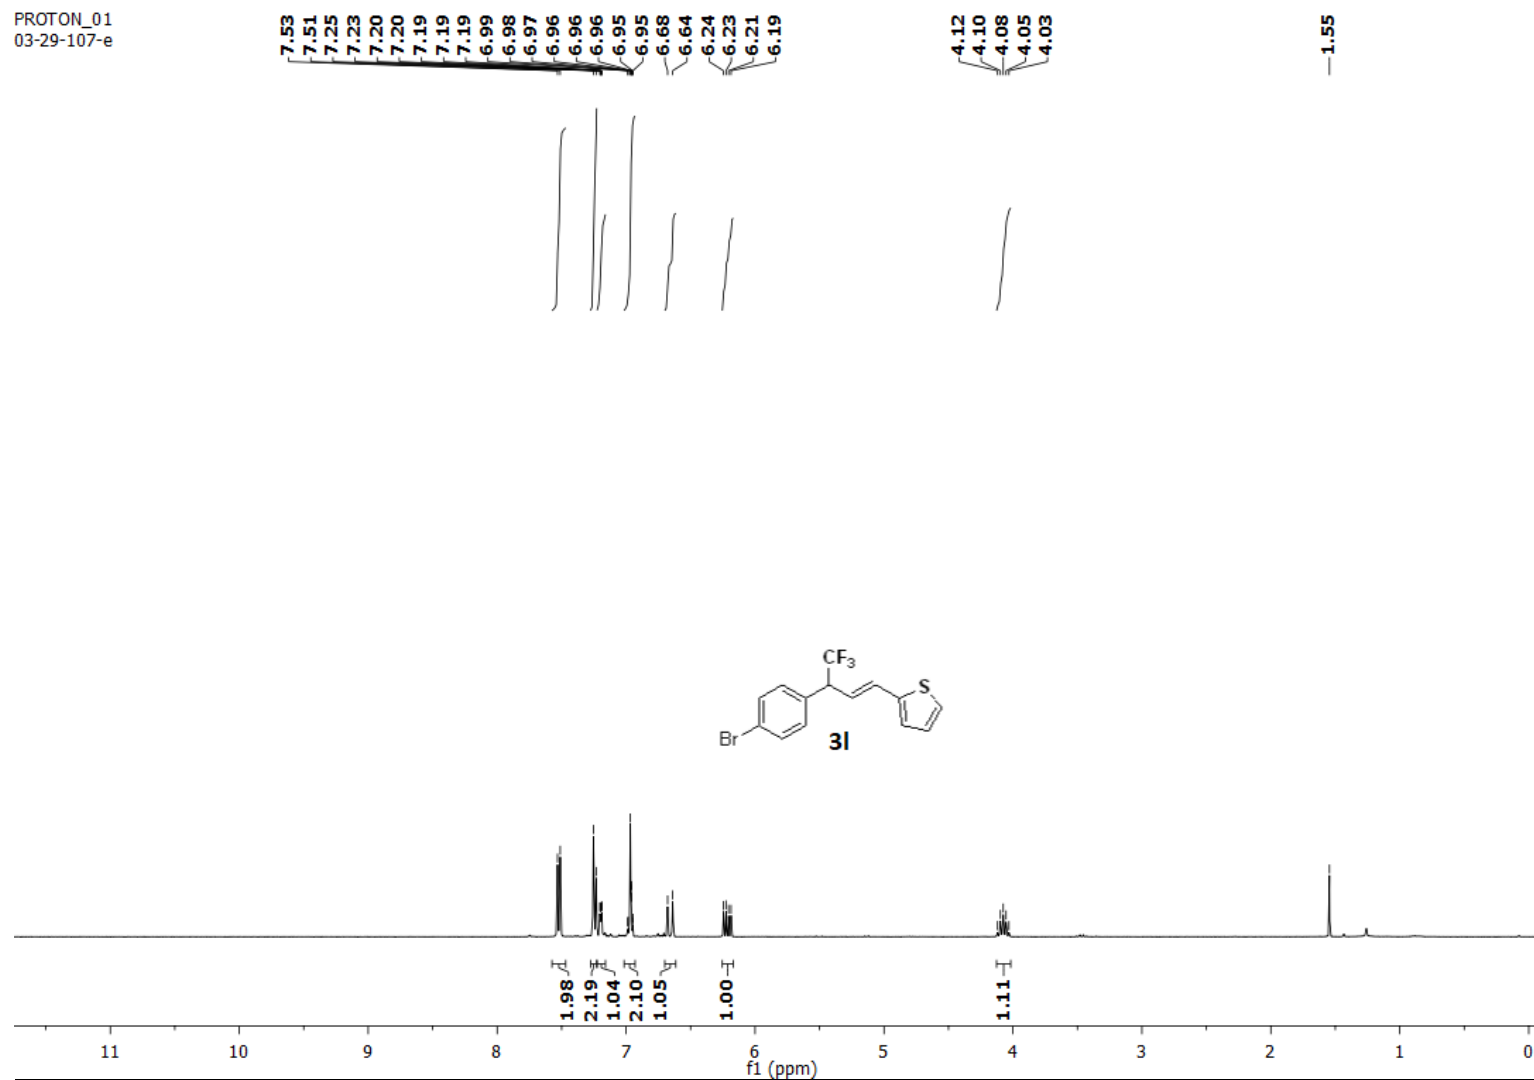

**$^{19}\text{F}$  NMR (376 MHz,  $\text{CDCl}_3$ ) of 3I**

FLUORINE\_01  
03-29-107-e

-68.97  
-69.00

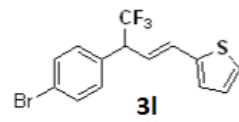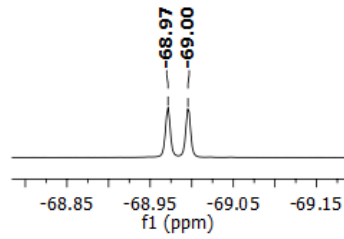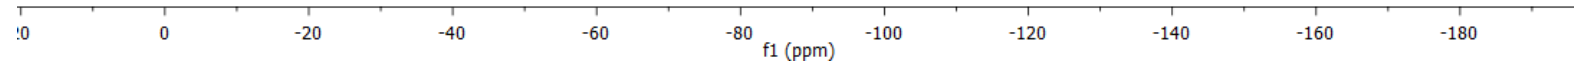

<sup>13</sup>C NMR (100 MHz, CDCl<sub>3</sub>) of 3I

CARBON\_01  
03-29-107-e

140.74  
133.39  
132.04  
130.69  
129.78  
128.88  
127.45  
126.98  
126.76  
125.15  
124.19  
122.52  
121.40  
121.19

53.08  
52.80  
52.52  
52.24

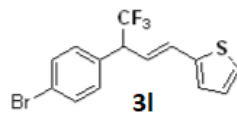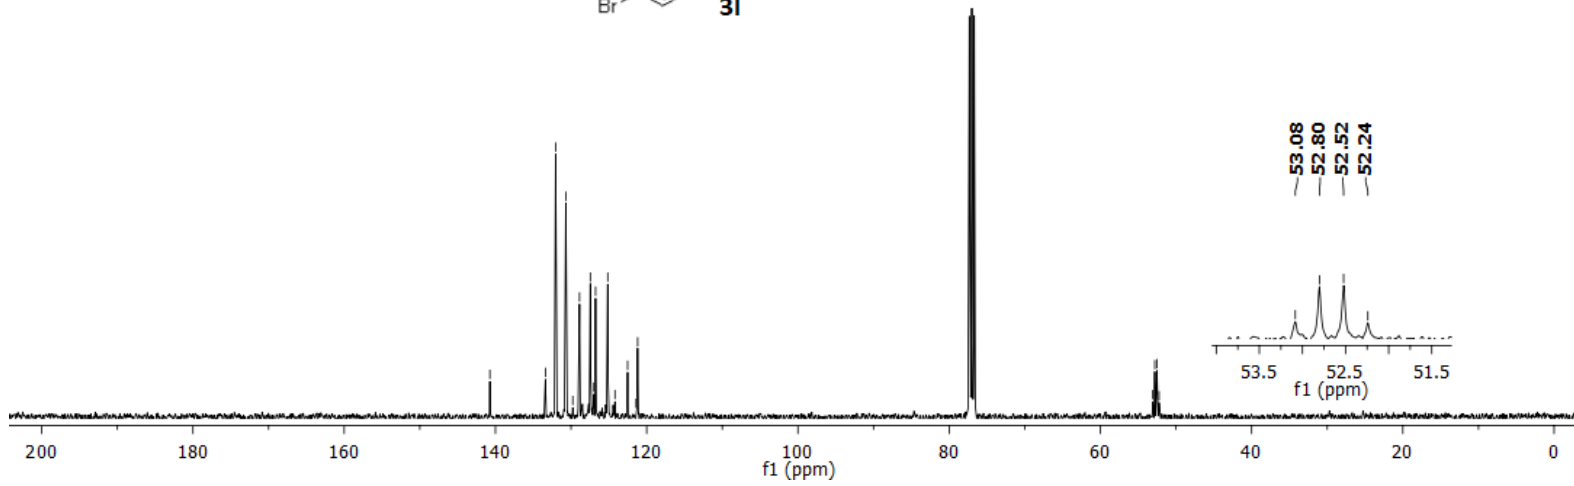

<sup>1</sup>H NMR (400 MHz, CDCl<sub>3</sub>) of 3m

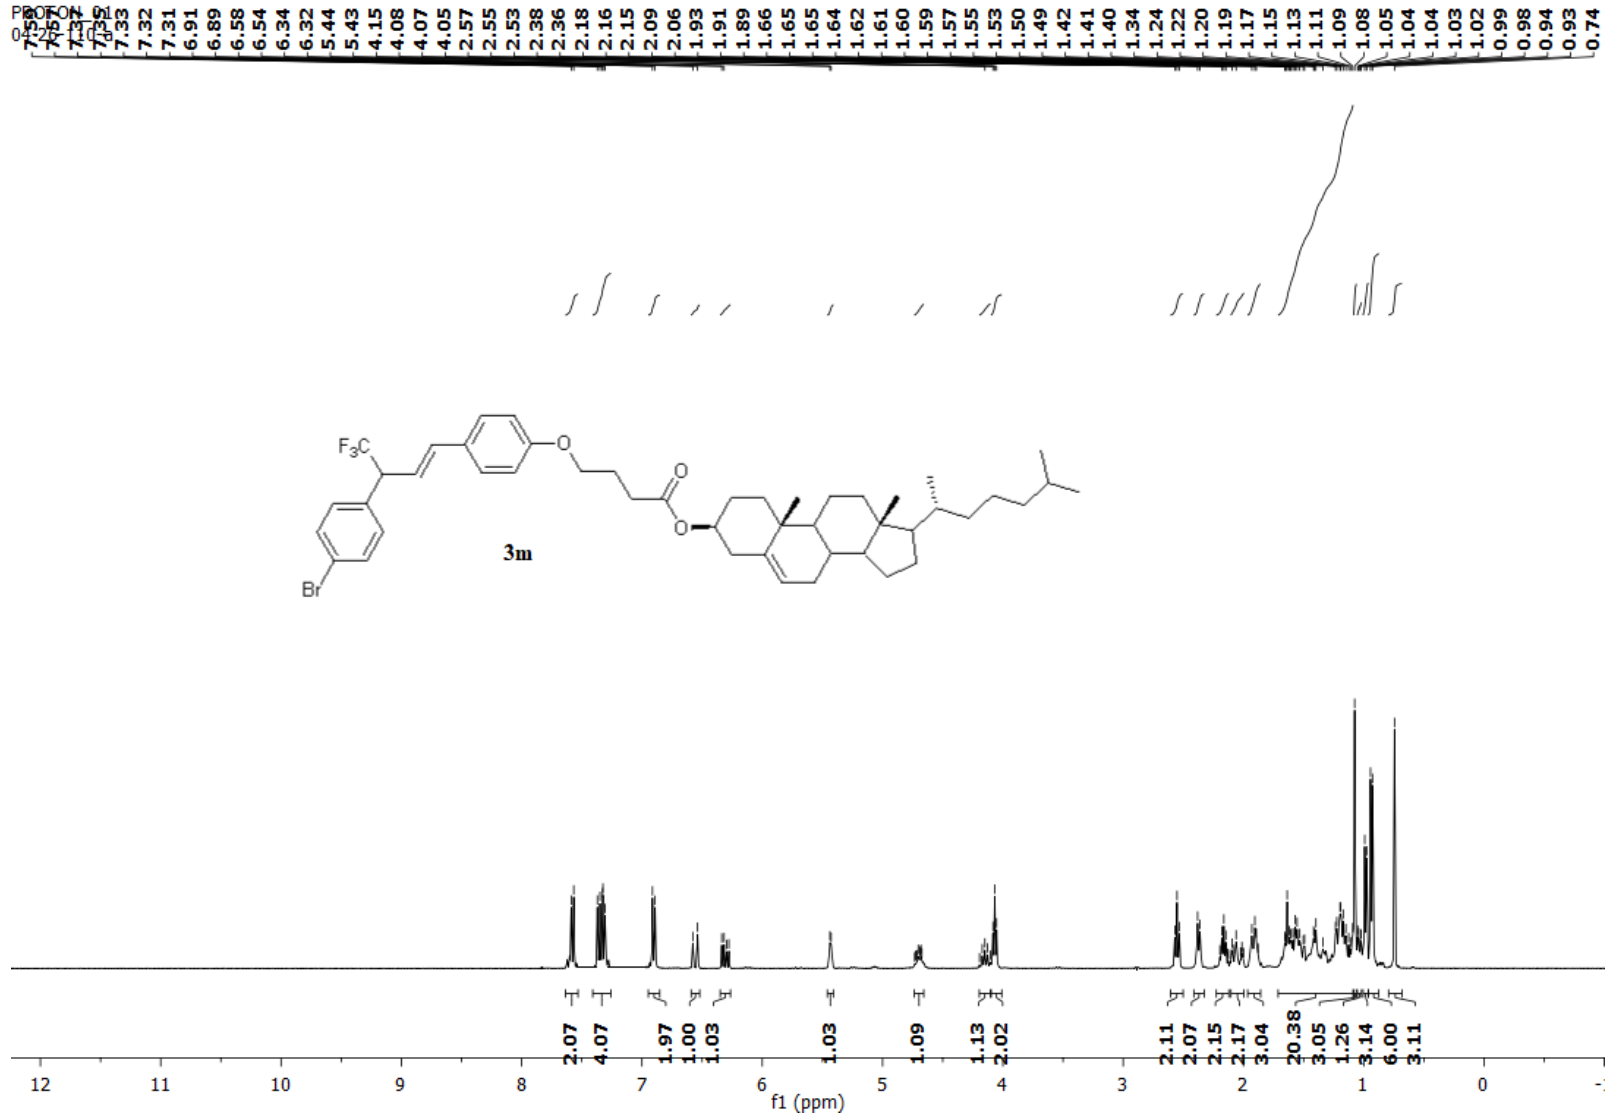

<sup>19</sup>F NMR (376 MHz, CDCl<sub>3</sub>) of 3m

FLUORINE\_01  
04-26-110-a

-69.00  
-69.02

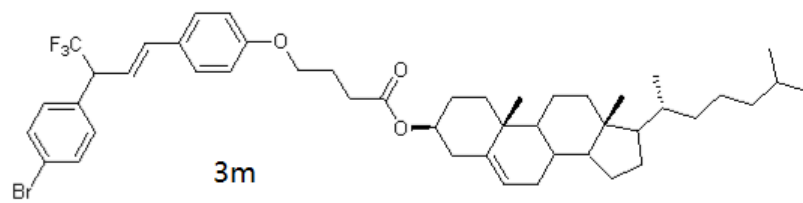

3m

-69.00  
-69.02

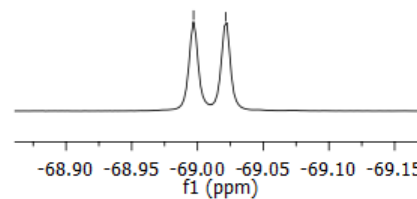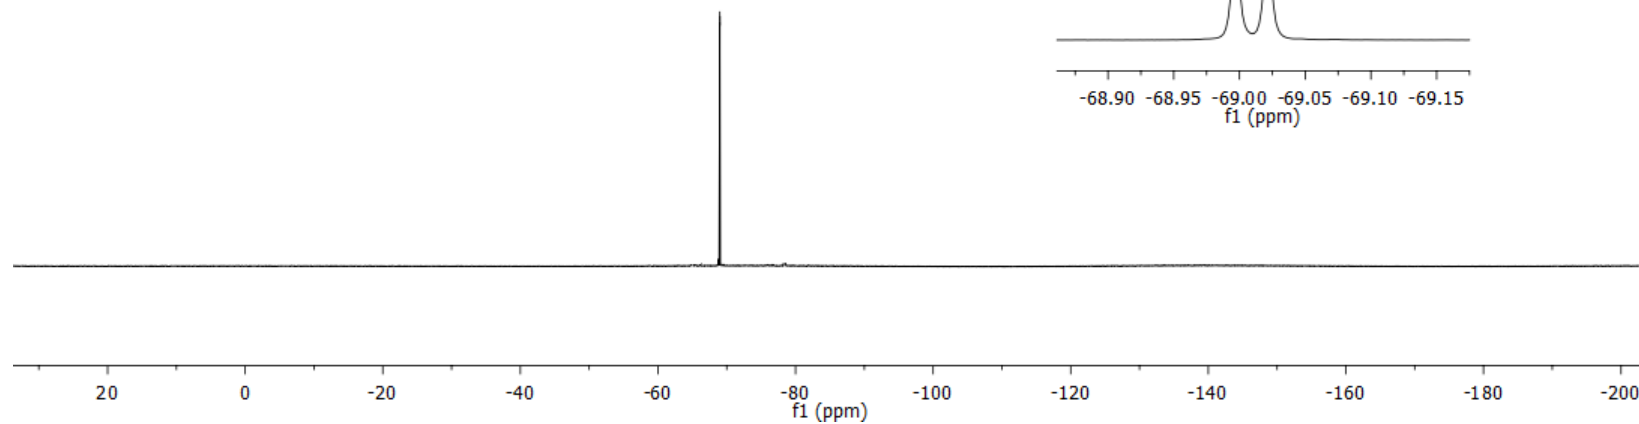

<sup>13</sup>C NMR (100 MHz, CDCl<sub>3</sub>) of 3m

CARBON\_01  
05-05-110-a

—172.32

—158.83

139.41  
135.12  
133.77  
131.76  
130.46  
129.93  
128.54  
127.60  
127.02  
124.20  
122.48  
122.14  
121.81  
119.44  
114.44

73.91  
66.66  
60.18  
56.49  
55.95  
53.09  
52.82  
52.55  
52.33  
49.83  
42.12  
39.54  
39.33  
37.95  
36.78  
36.39  
35.99  
35.59  
31.70  
30.91  
30.69  
28.03  
27.81  
27.61  
24.47  
24.09  
23.64  
22.61  
22.36  
20.84  
19.11  
18.52  
14.00  
11.66

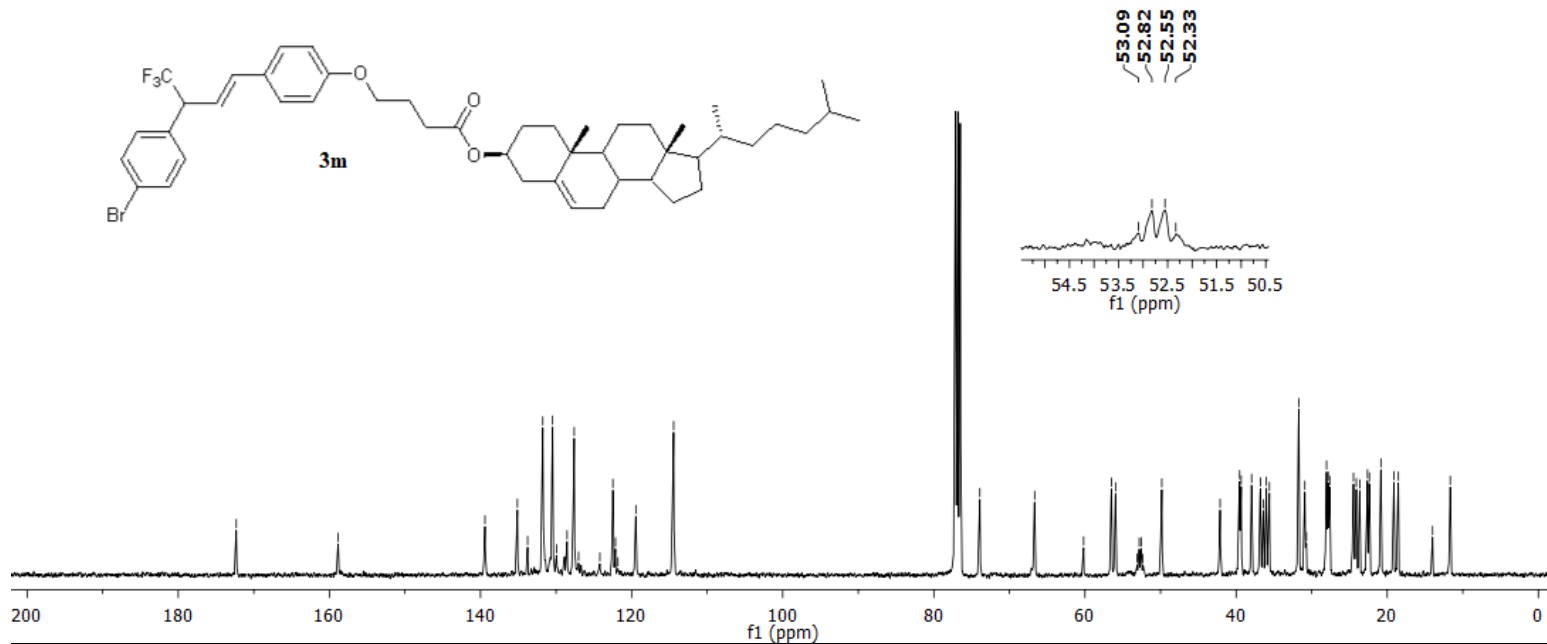

<sup>1</sup>H NMR (400 MHz, CDCl<sub>3</sub>) of 3n

PROB  
03-1  
7.38  
7.38  
7.38  
7.38  
7.37  
7.37  
7.36  
7.36  
7.35  
7.35  
7.34  
7.34  
7.33  
7.33  
7.32  
7.31  
7.31  
7.29  
7.29  
7.28  
7.27  
7.24  
6.55  
6.43  
6.41  
6.39  
6.37  
4.18  
4.15  
4.13  
4.11  
4.09

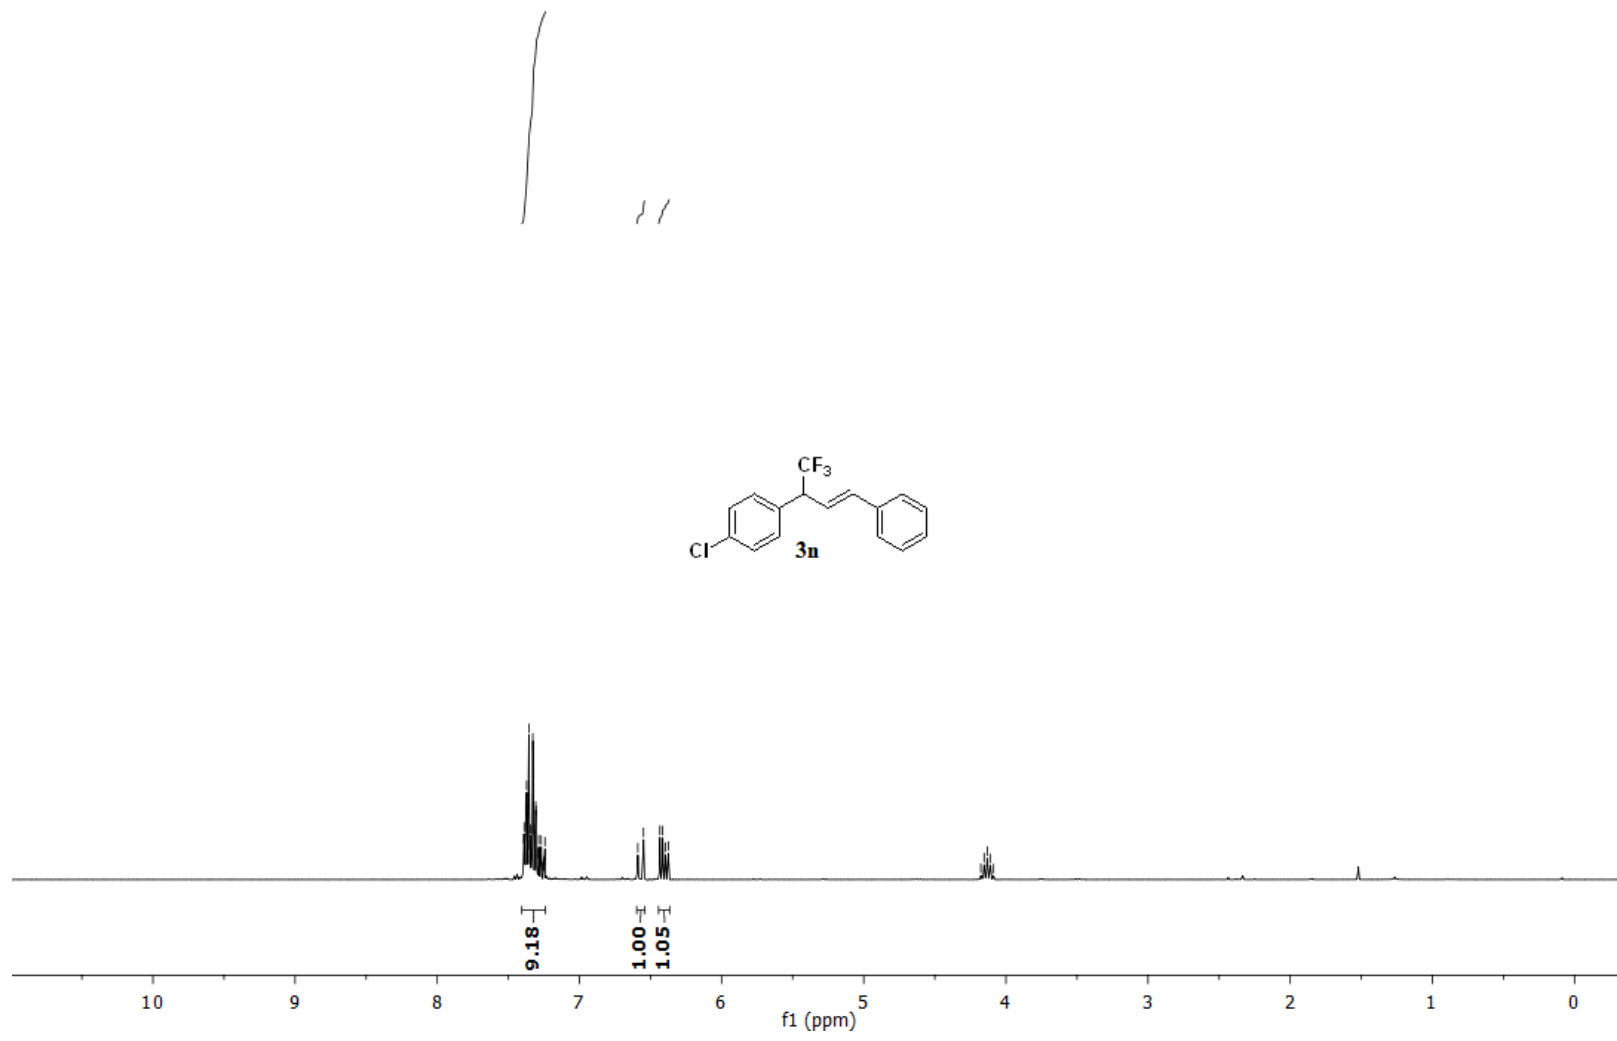



FLUORINE\_01  
03-16-106-b

<sup>19</sup>F NMR (376 MHz, CDCl<sub>3</sub>) of 3n

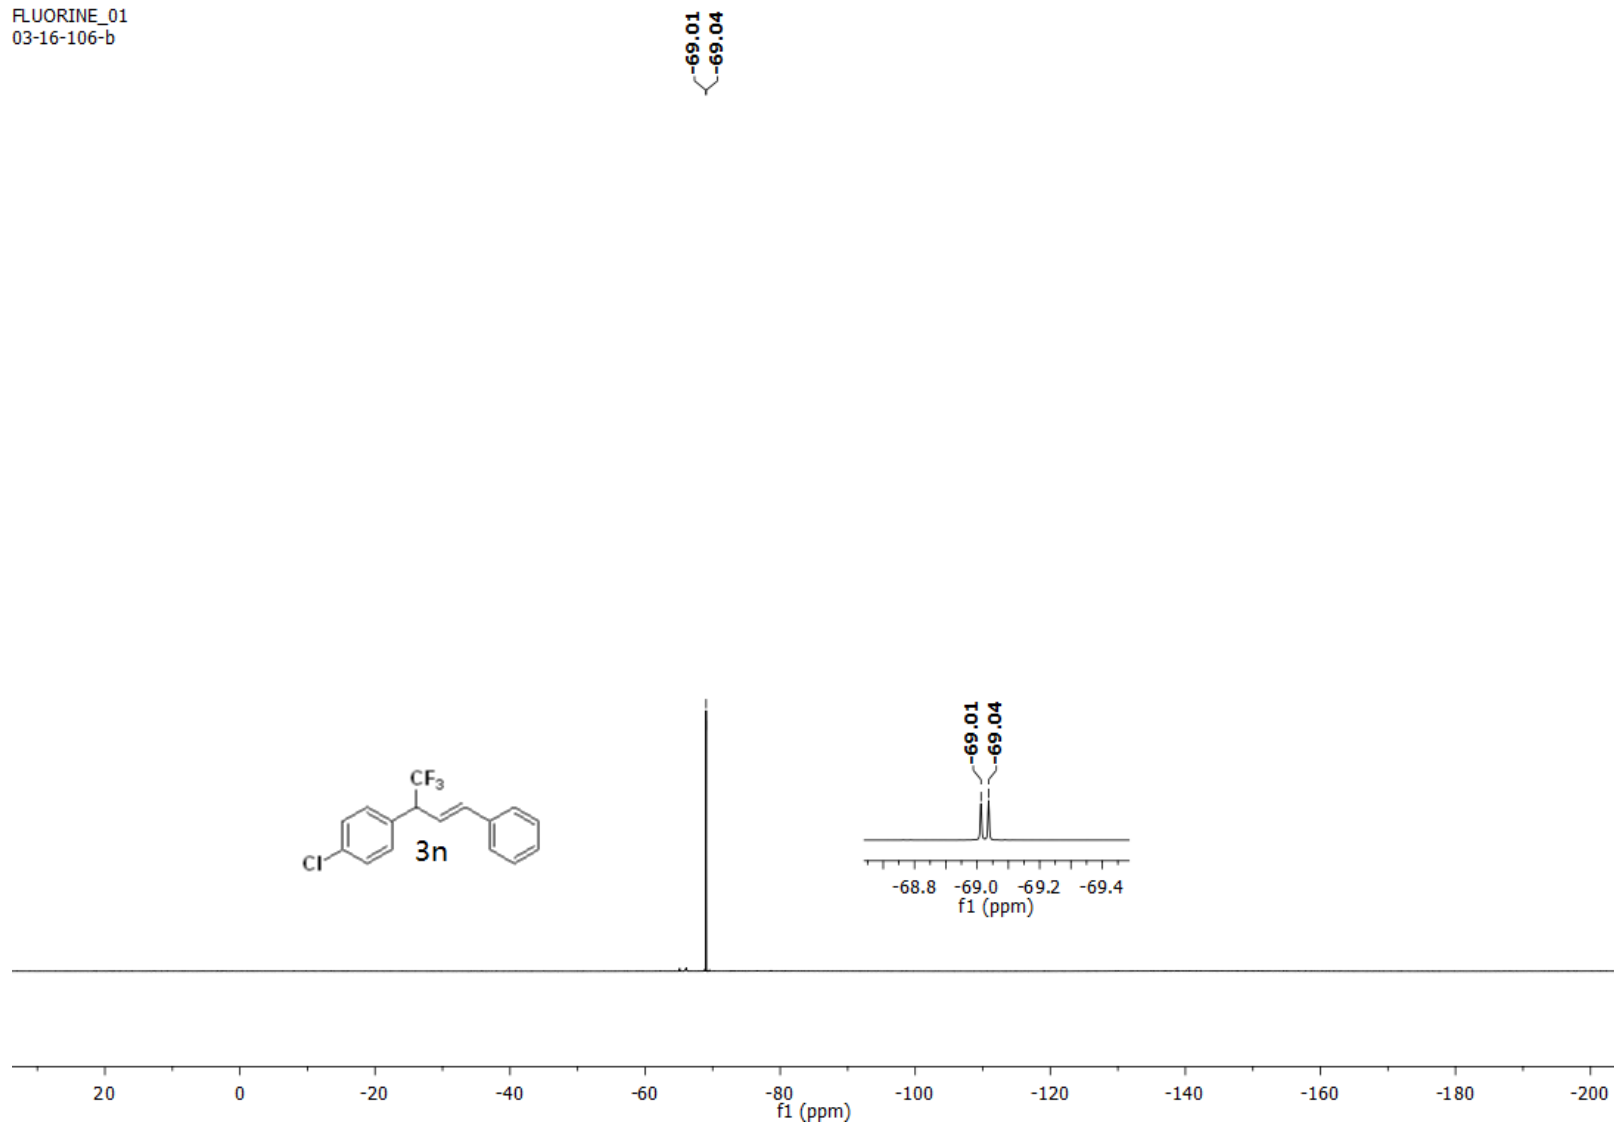

<sup>13</sup>C NMR (100 MHz, CDCl<sub>3</sub>) of 3n

CARBON\_01  
03-16-106-b

135.85  
134.27  
133.13  
130.31  
129.94  
129.01  
128.62  
128.29  
127.15  
126.52  
124.36  
121.97  
121.57

53.15  
52.87  
52.59  
52.32

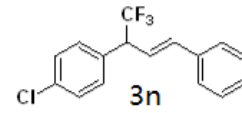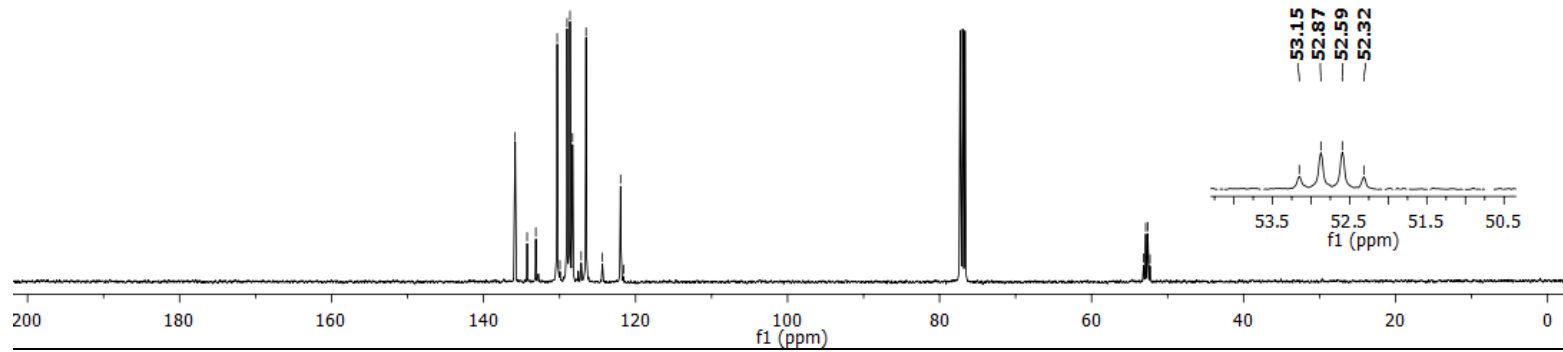

<sup>1</sup>H NMR (400 MHz, CDCl<sub>3</sub>) of 3o

PROTON\_01  
04-18-106-h

7.51  
7.50  
7.48  
7.41  
7.40  
7.36  
7.34  
7.32  
7.30  
7.28  
7.27  
7.22  
7.20  
7.18  
7.16  
7.13  
7.11  
6.66  
6.62  
6.47  
6.45  
6.43  
6.41  
4.68  
4.66  
4.64  
4.62  
4.60  
-1.55

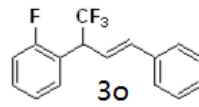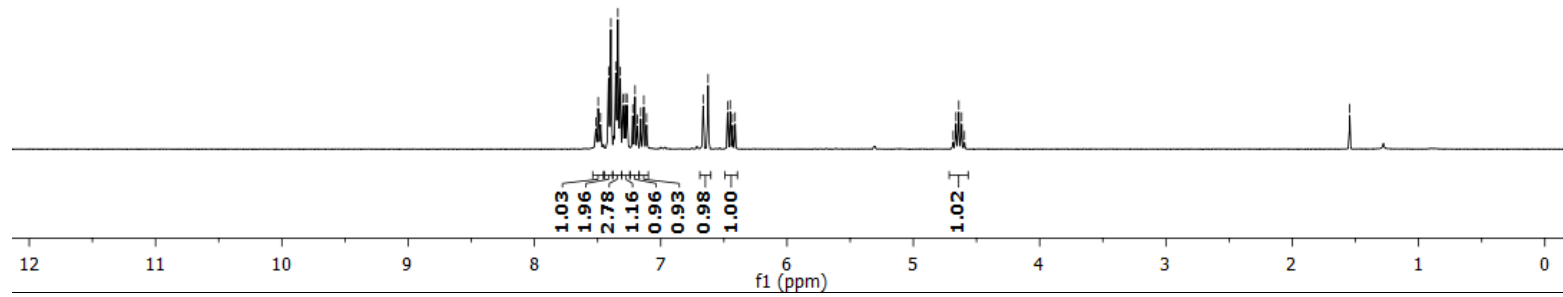

FLUORINE\_01  
04-18-106-h

<sup>19</sup>F NMR (376 MHz, CDCl<sub>3</sub>) of 3o

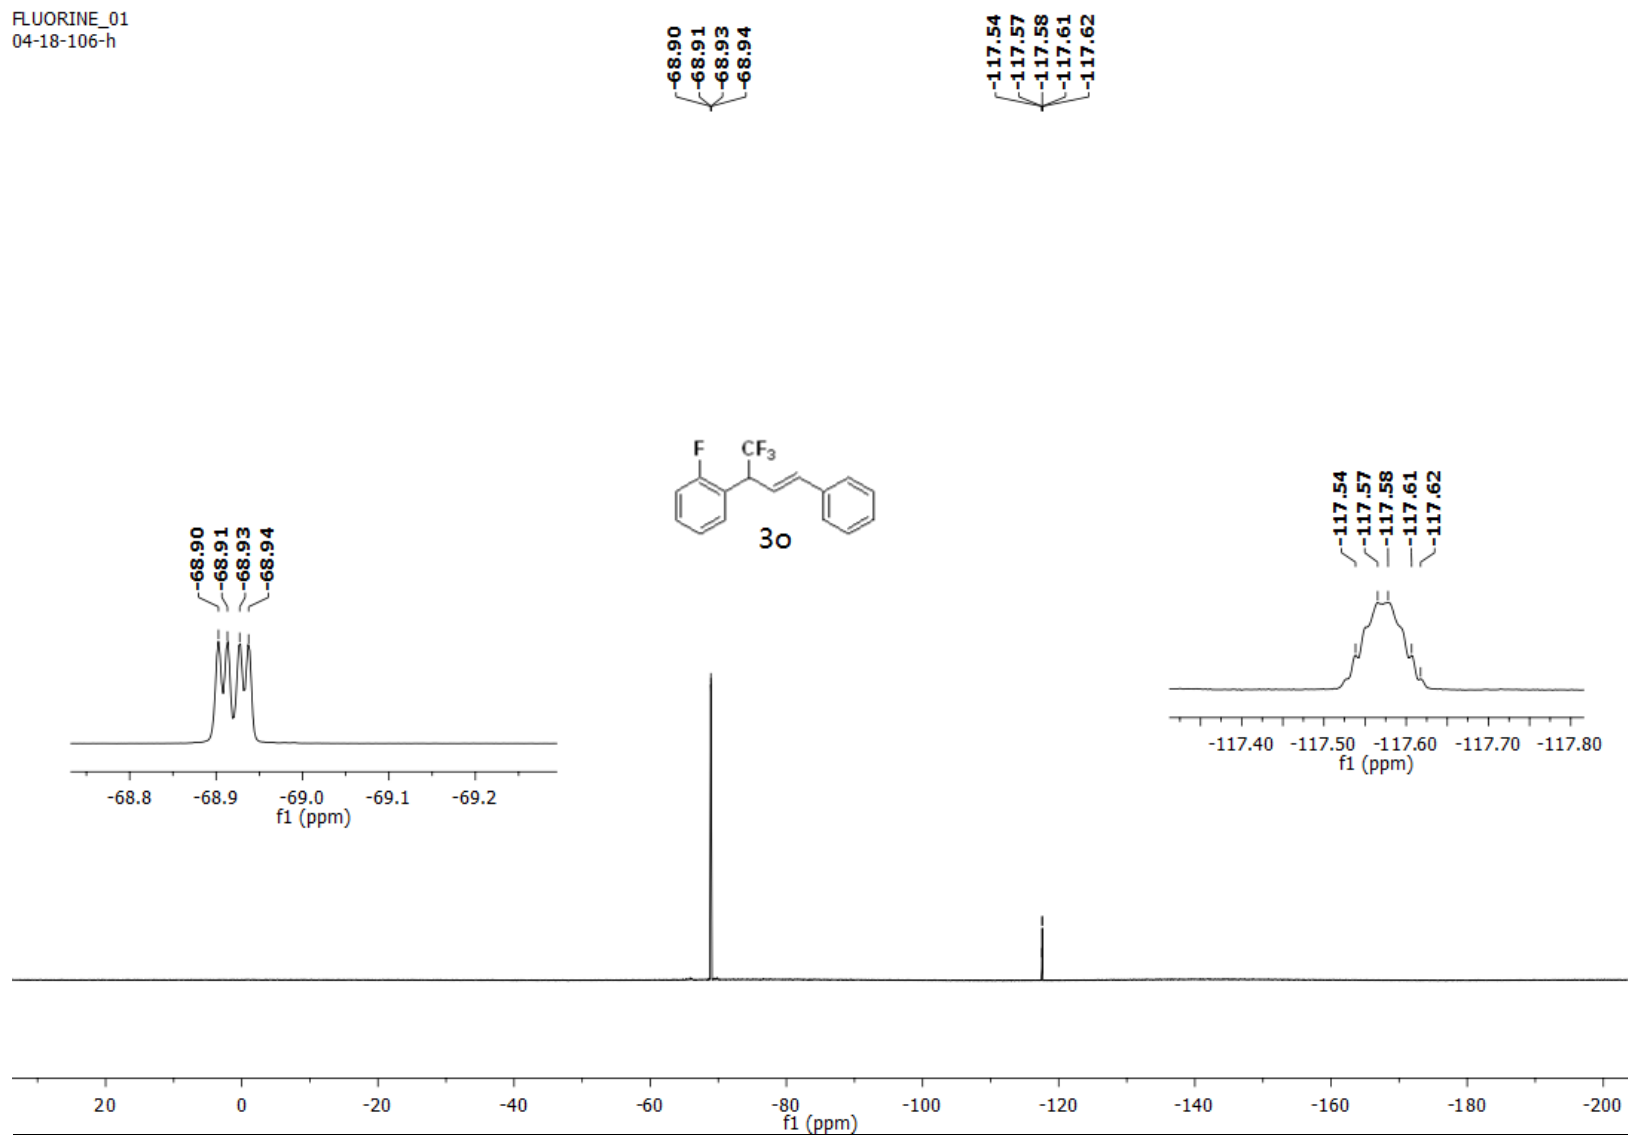

CARBON\_01  
04-19-106-h

$^{13}\text{C}$  NMR (100 MHz,  $\text{CDCl}_3$ ) of 3o

161.77  
159.30

135.93  
129.81  
129.72  
129.52  
128.51  
128.15  
127.07  
126.46  
124.36  
124.33  
121.95  
121.82  
121.49  
121.21  
115.82  
115.59

45.56  
45.28  
44.99  
44.73

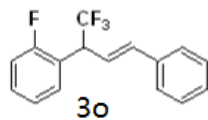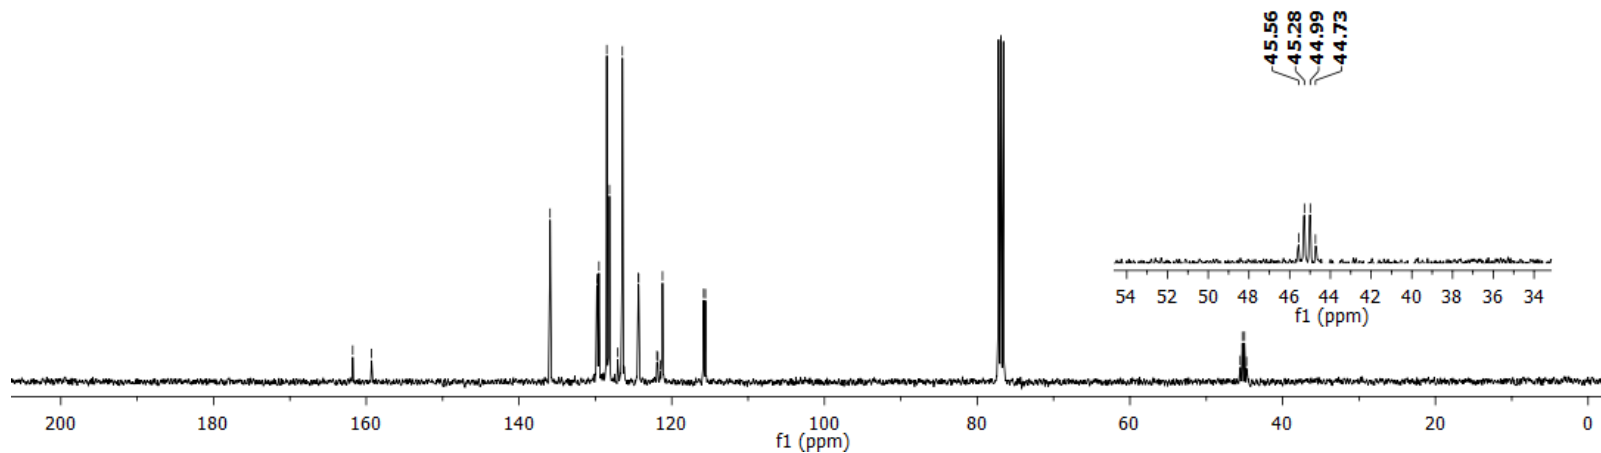

PROTON\_01  
04-26-109-t

<sup>1</sup>H NMR (400 MHz, CDCl<sub>3</sub>) of 3p

7.39  
7.35  
7.33  
7.31  
7.27  
7.25  
6.99  
6.97  
6.93  
6.93  
6.91  
6.57  
6.53  
6.48  
6.46  
6.44  
6.42  
4.17  
4.15  
4.13  
4.11  
4.08  
3.84

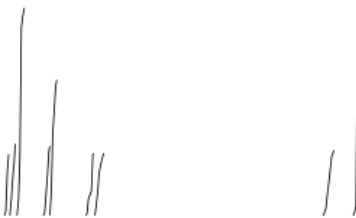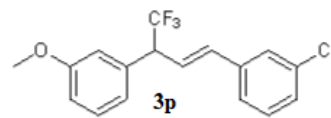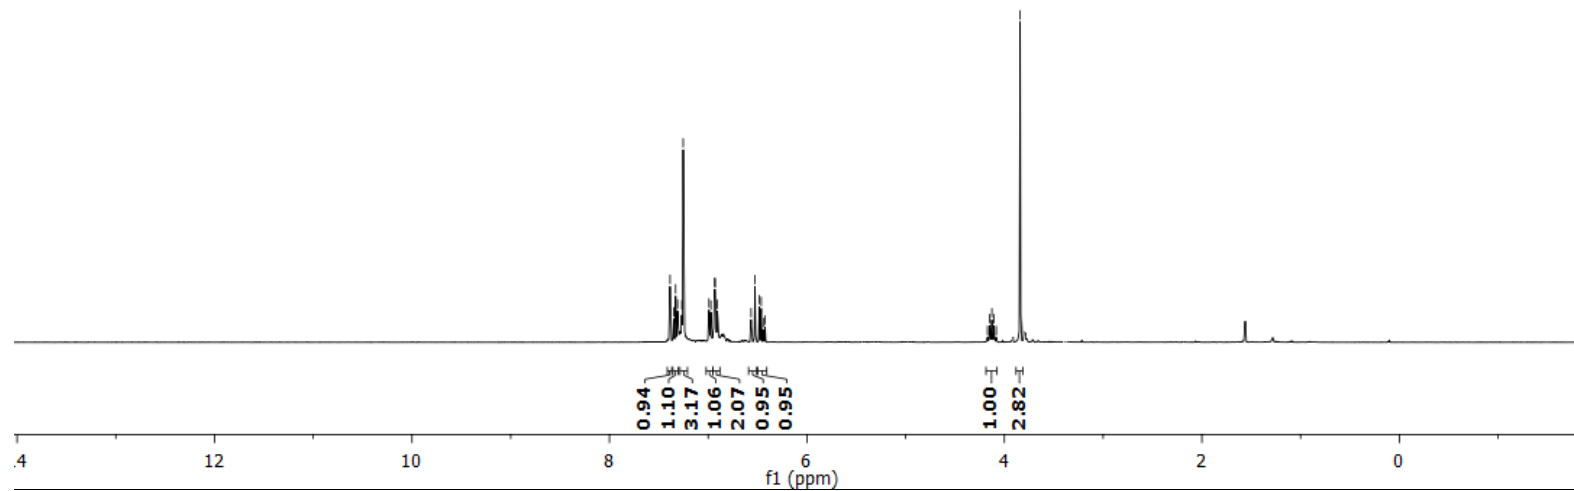

<sup>19</sup>F NMR (376 MHz, CDCl<sub>3</sub>) of 3p

FLUORINE\_01  
04-26-109-t

-68.71  
-68.74

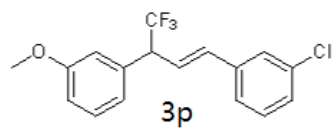

-68.71  
-68.74

-68.3 -68.5 -68.7 -68.9 -69.1  
f1 (ppm)

20 0 -20 -40 -60 -80 -100 -120 -140 -160 -180 -200  
f1 (ppm)

<sup>13</sup>C NMR (100 MHz, CDCl<sub>3</sub>) of 3p

CARBON\_01  
05-02-109-t

159.95  
138.06  
135.85  
134.69  
134.27  
129.99  
129.92  
128.19  
127.36  
126.54  
124.90  
124.57  
124.24  
121.77  
121.33  
115.16  
113.50

55.35  
53.87  
53.59  
53.31  
53.03

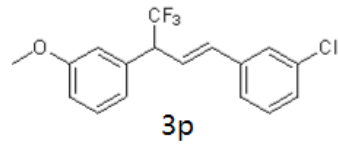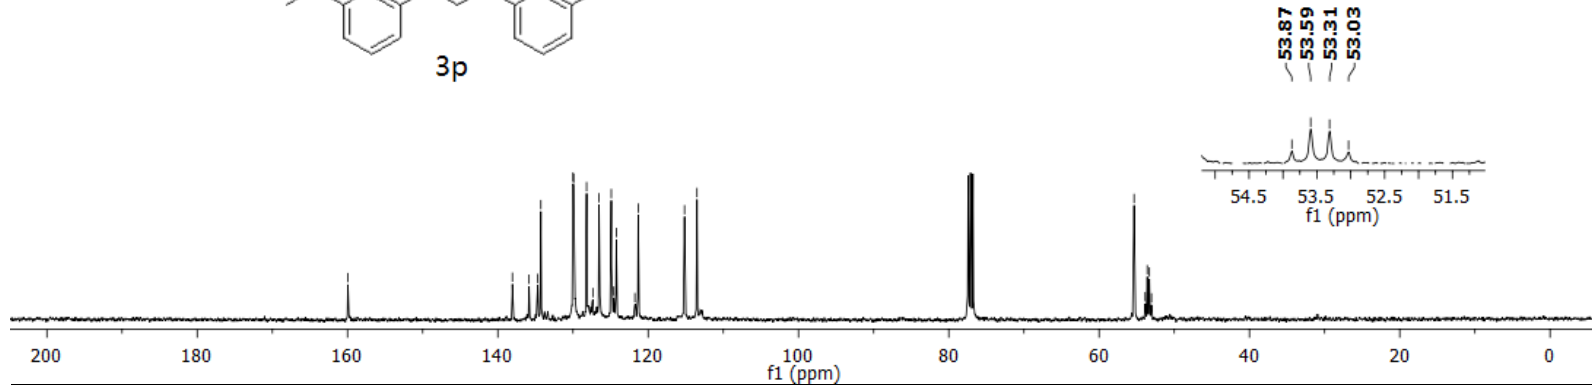



PROTON\_01  
03-23-106-c

<sup>1</sup>H NMR (400 MHz, CDCl<sub>3</sub>) of 3q

7.36  
7.35  
7.34  
7.34  
7.33  
7.31  
7.29  
7.27  
7.25  
7.24  
7.13  
7.11  
6.54  
6.50  
6.36  
6.34  
6.32  
6.30  
4.15  
4.12  
4.10  
4.08  
4.06  
-2.32

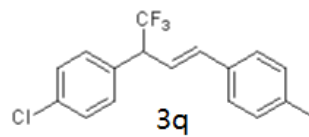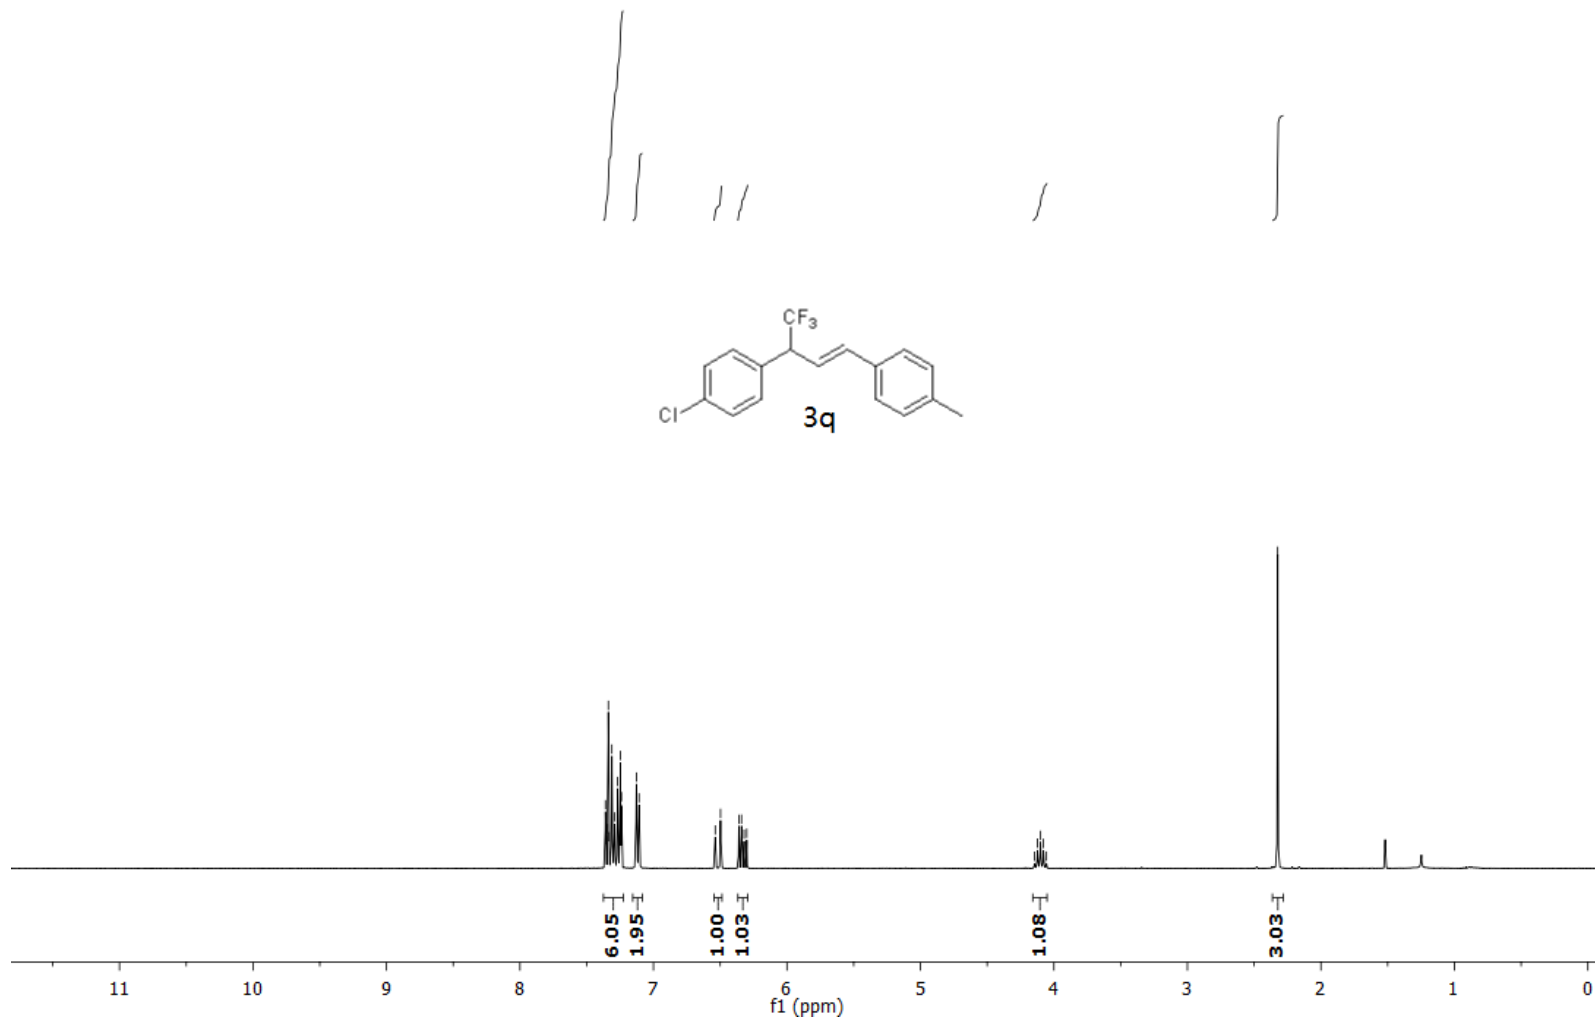

<sup>19</sup>F NMR (376 MHz, CDCl<sub>3</sub>) of 3q

FLUORINE\_01  
03-23-106-c

-69.08  
-69.10

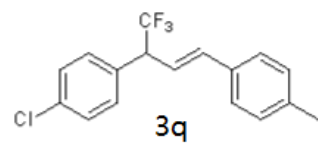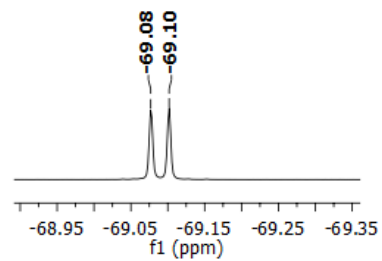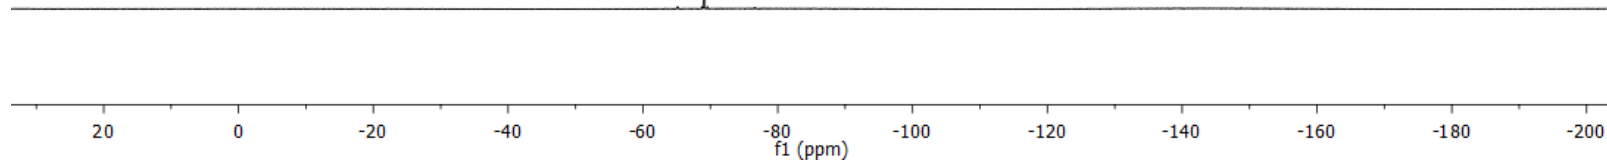

<sup>13</sup>C NMR (100 MHz, CDCl<sub>3</sub>) of 3q

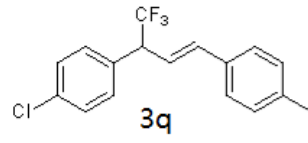

138.24  
135.71  
134.21  
133.28  
133.13  
130.32  
129.98  
129.31  
128.98  
127.19  
126.42  
124.40  
121.60  
120.90

53.17  
52.89  
52.61  
52.33

21.19

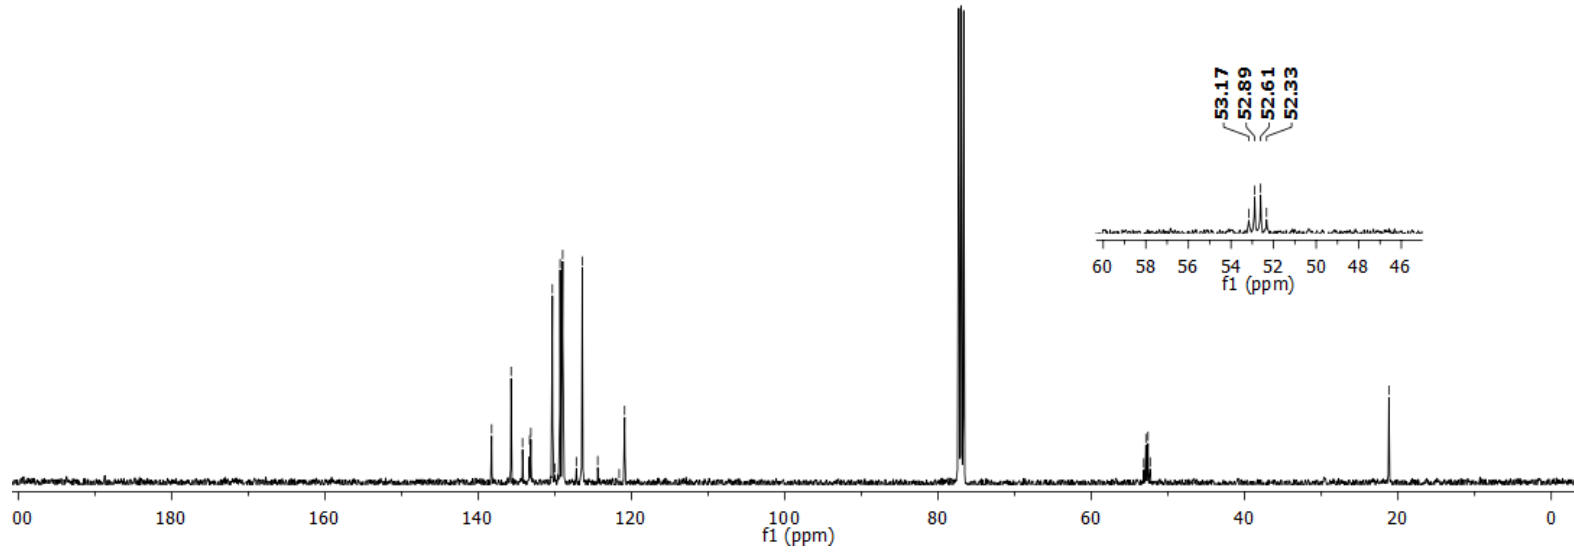

PROTON\_01  
04-19-bn3

<sup>1</sup>H NMR (400 MHz, CDCl<sub>3</sub>) of 3r

7.57  
7.55  
7.52  
7.52  
7.51  
7.49  
7.46  
7.45  
7.45  
7.44  
7.43  
7.41  
7.40  
7.39  
7.38  
7.37  
7.14  
7.12  
7.10  
7.09  
7.07  
7.07  
6.72  
6.69  
6.56  
6.54  
6.52  
6.50  
5.19  
4.28  
4.25  
4.23  
4.21  
4.19

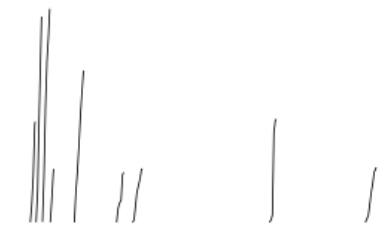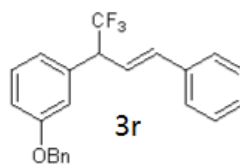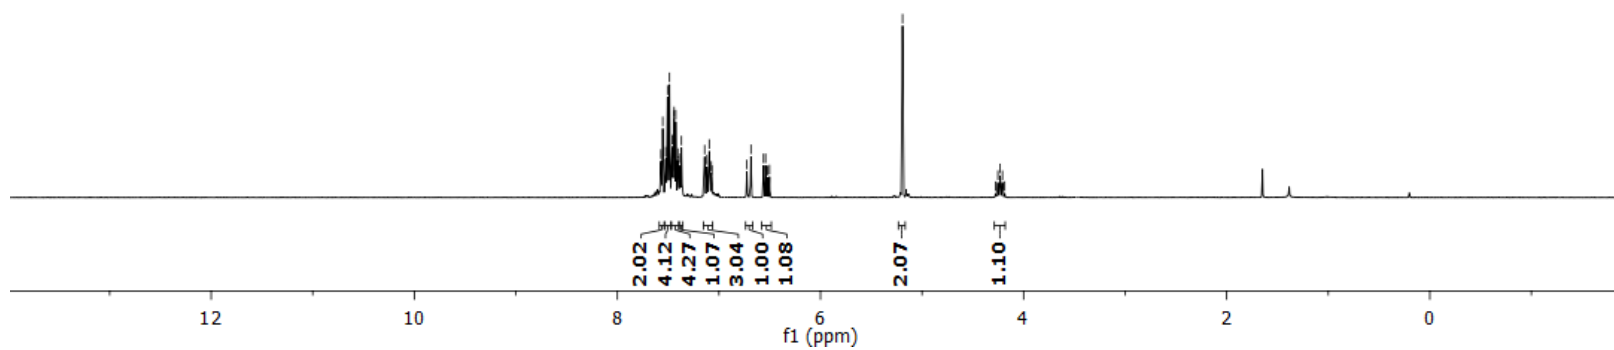

<sup>19</sup>F NMR (376 MHz, CDCl<sub>3</sub>) of 3r

FLUORINE\_01  
04-19-bn3

-68.62  
-68.65

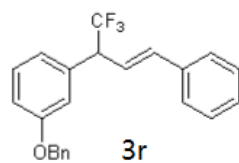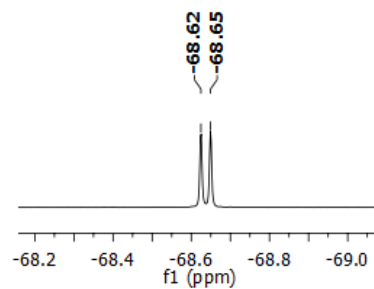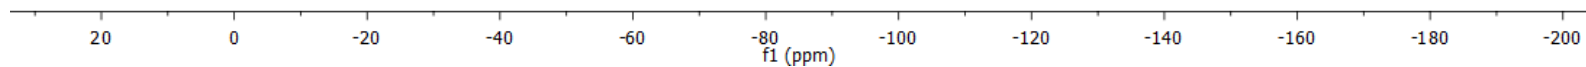

<sup>13</sup>C NMR (100 MHz, CDCl<sub>3</sub>) of 3r

CARBON\_02  
04-24-109-b

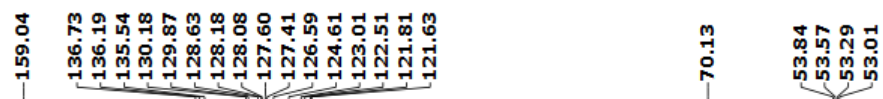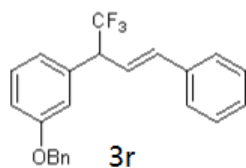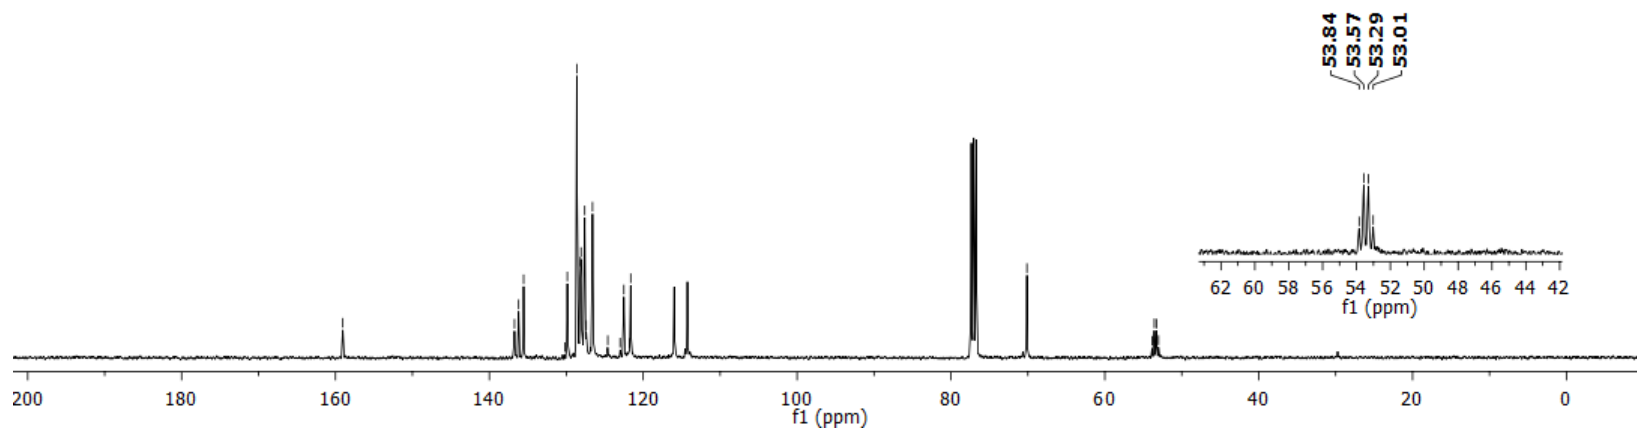

PROTON\_01  
04-20-109-d

<sup>1</sup>H NMR (400 MHz, CDCl<sub>3</sub>) of 3s

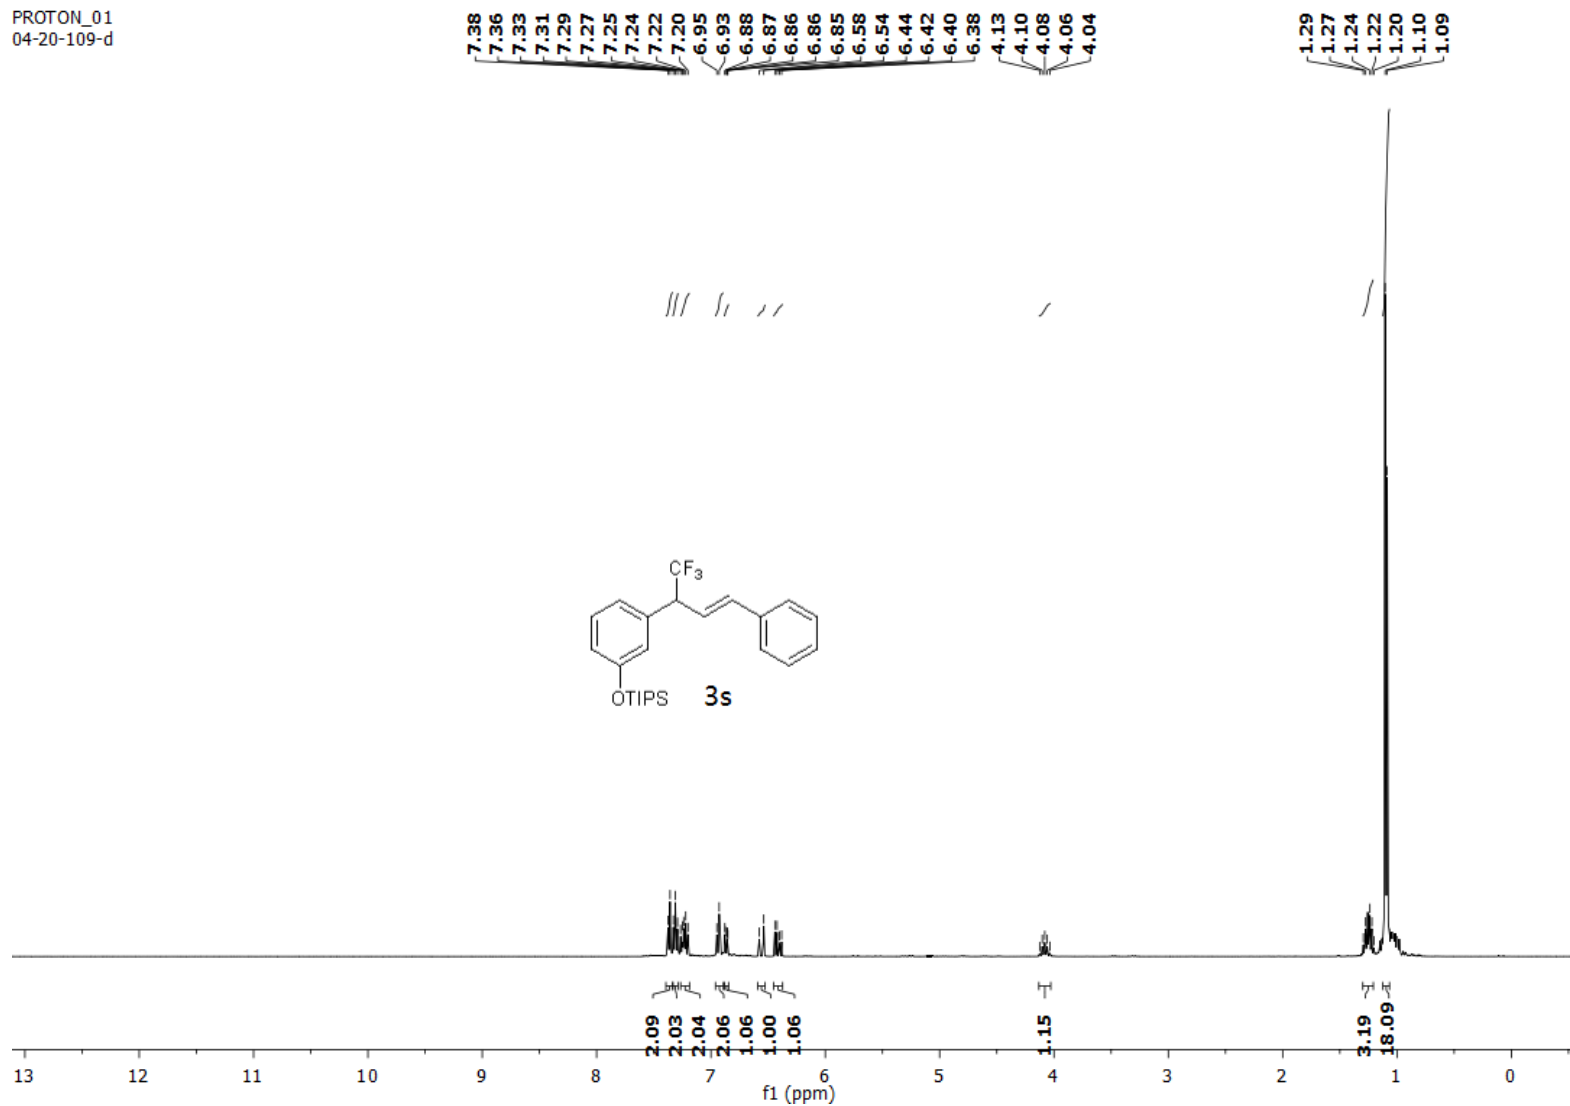

<sup>19</sup>F NMR (376 MHz, CDCl<sub>3</sub>) of 3s

FLUORINE\_01  
04-20-109-d

-68.82  
-68.84

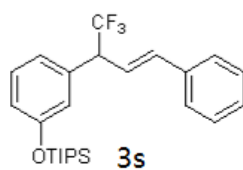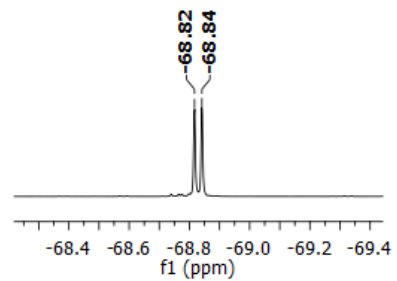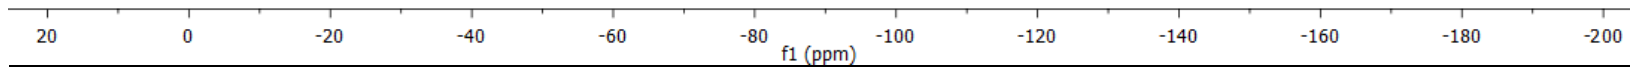



CARBON\_01  
04-20-109-d

<sup>13</sup>C NMR (100 MHz, CDCl<sub>3</sub>) of 3s

156.29  
136.17  
135.85  
135.34  
130.11  
129.63  
128.55  
128.05  
127.39  
126.47  
124.60  
122.64  
121.71  
120.62  
119.71

53.57  
53.30  
53.02  
52.74

17.82  
12.61

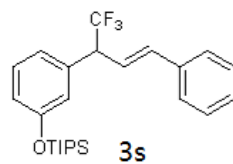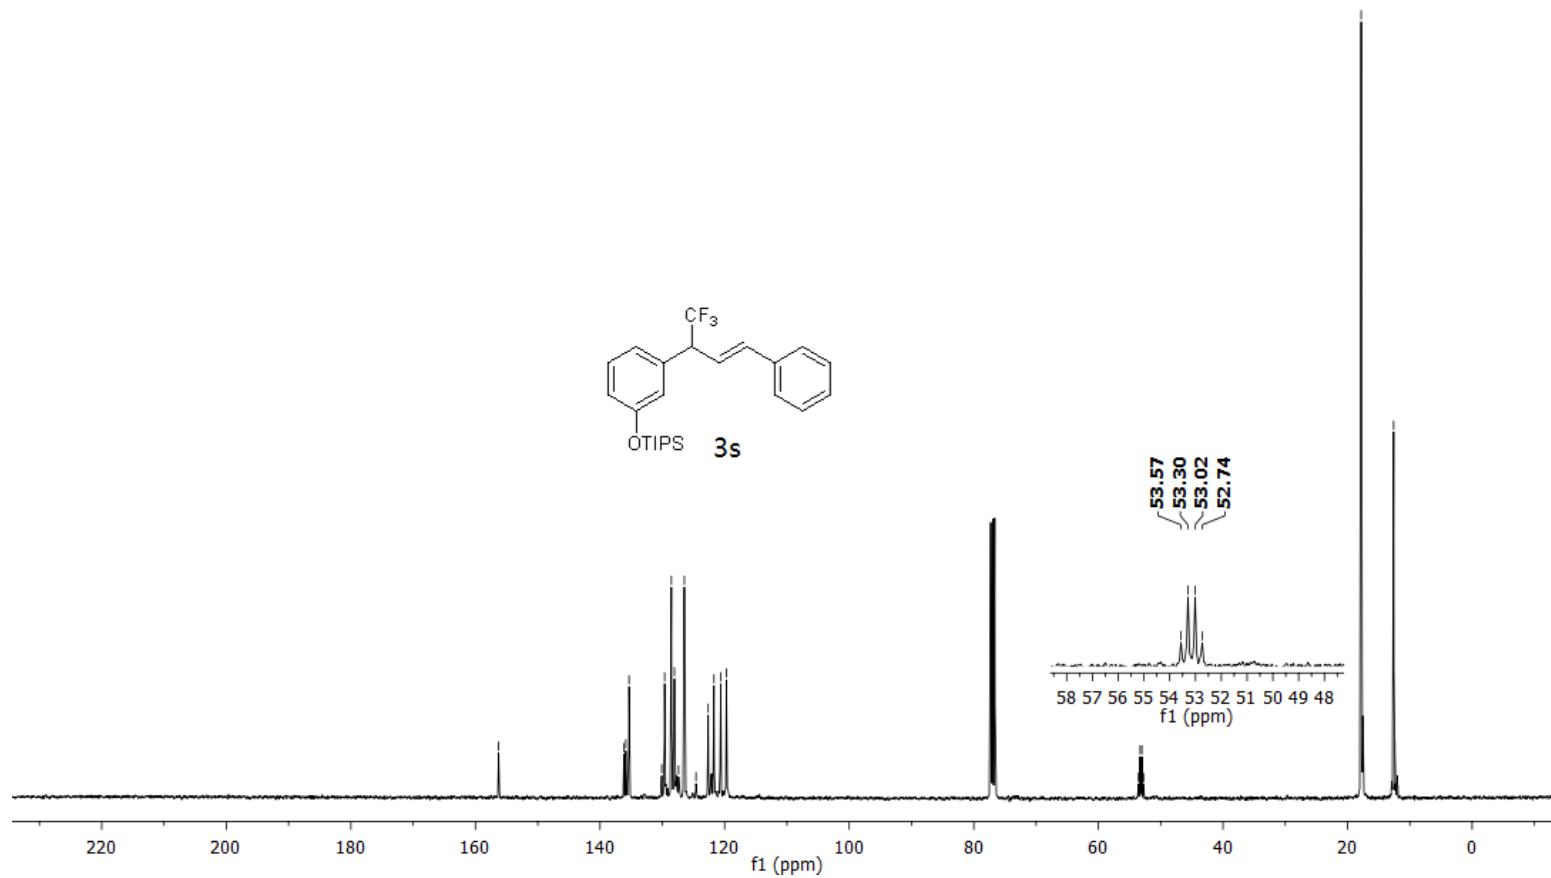

PROTON\_01  
04-08-109-a

<sup>1</sup>H NMR (400 MHz, CDCl<sub>3</sub>) of 3t

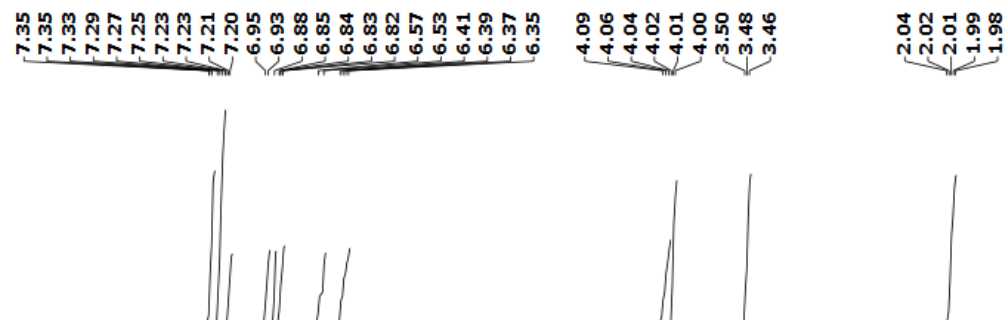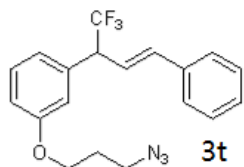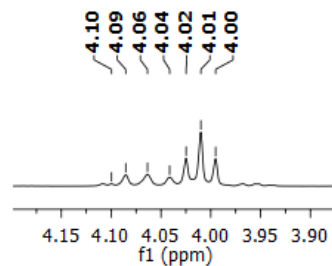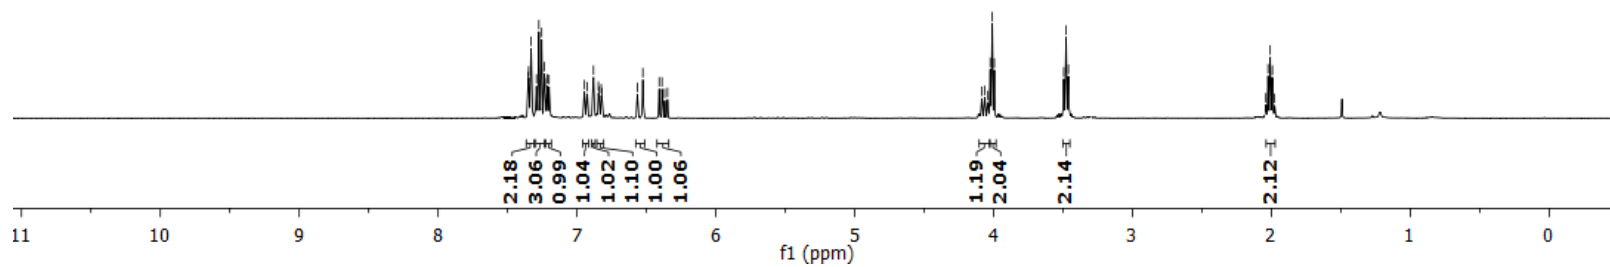

<sup>19</sup>F NMR (376 MHz, CDCl<sub>3</sub>) of 3t

FLUORINE\_01  
04-08-109-a

-68.79  
-68.81

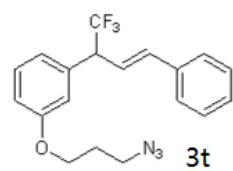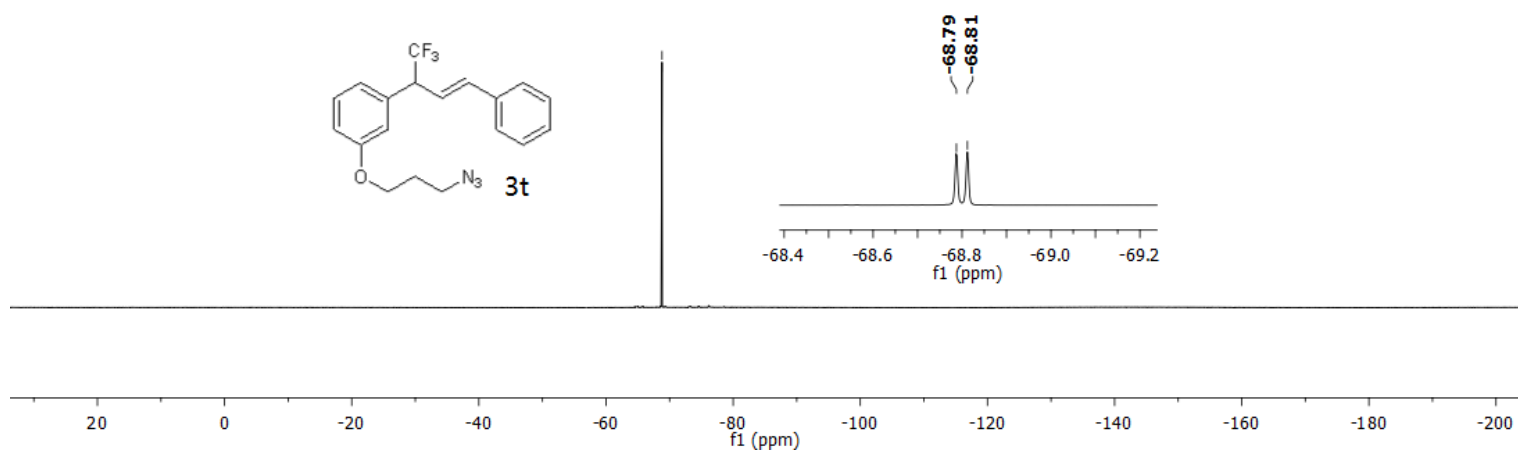

<sup>13</sup>C NMR (100 MHz, CDCl<sub>3</sub>) of 3t

CARBON\_01  
04-12-109-a

—158.91  
—136.22  
—136.12  
—135.54  
—130.15  
—129.85  
—128.60  
—128.16  
—127.37  
—126.55  
—124.58  
—122.47  
—121.81  
—121.56  
—115.55  
—113.84  
—64.54  
53.84  
53.56  
53.28  
53.02  
48.21  
—28.77

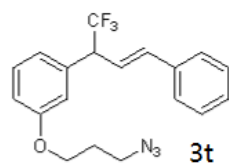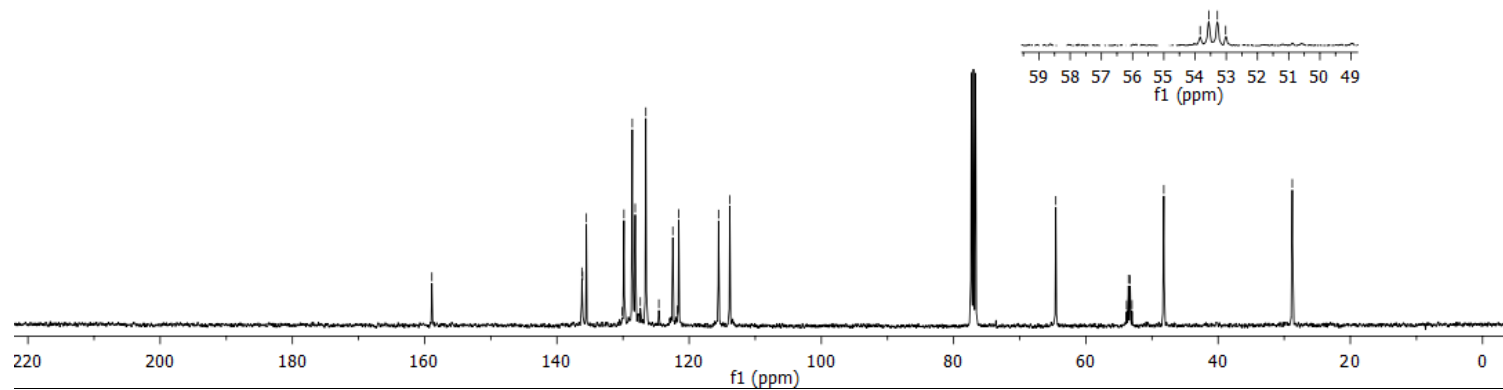

PROTON\_01  
04-24-109-f

<sup>1</sup>H NMR (400 MHz, CDCl<sub>3</sub>) of 3u

8.22  
8.20  
7.66  
7.64  
7.62  
7.54  
7.52  
7.50  
7.47  
7.45  
7.43  
7.34  
7.32  
7.31  
7.29  
7.25  
7.24  
7.22  
6.86  
6.84  
6.58  
6.54  
6.31  
6.29  
6.27  
6.25  
4.20  
4.18  
4.16  
4.14  
4.11  
3.80

—1.56

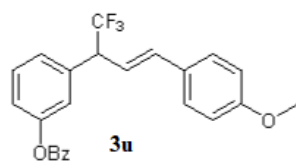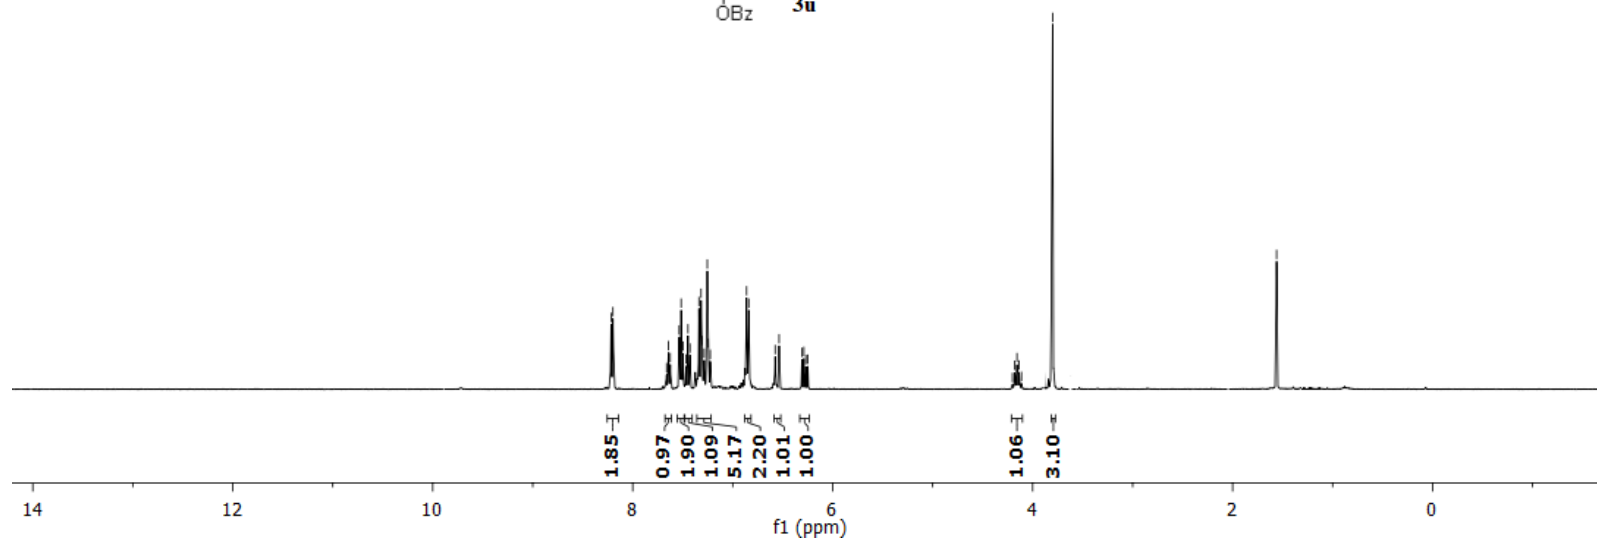

<sup>19</sup>F NMR (376 MHz, CDCl<sub>3</sub>) of **3u**

FLUORINE\_01  
04-24-109-f

-69.06  
-69.08

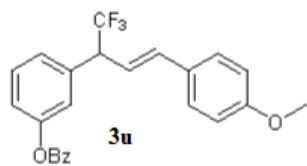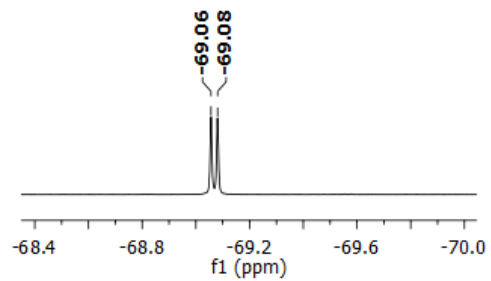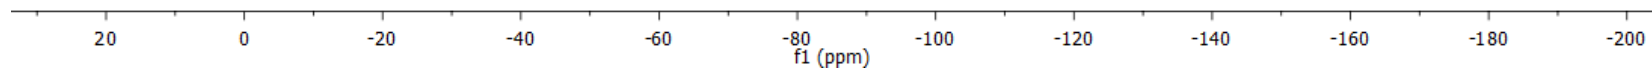

<sup>13</sup>C NMR (100 MHz, CDCl<sub>3</sub>) of 3t

CARBON\_01  
04-24-109-f

- 164.70
- 159.42
- 150.87
- 136.26
- 135.09
- 133.43
- 131.02
- 129.93
- 129.51
- 129.12
- 128.34
- 127.59
- 127.19
- 127.05
- 126.23
- 124.25
- 122.05
- 121.38
- 119.45
- 113.76
- 55.04
- 53.35
- 53.07
- 52.79
- 52.52

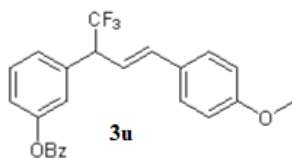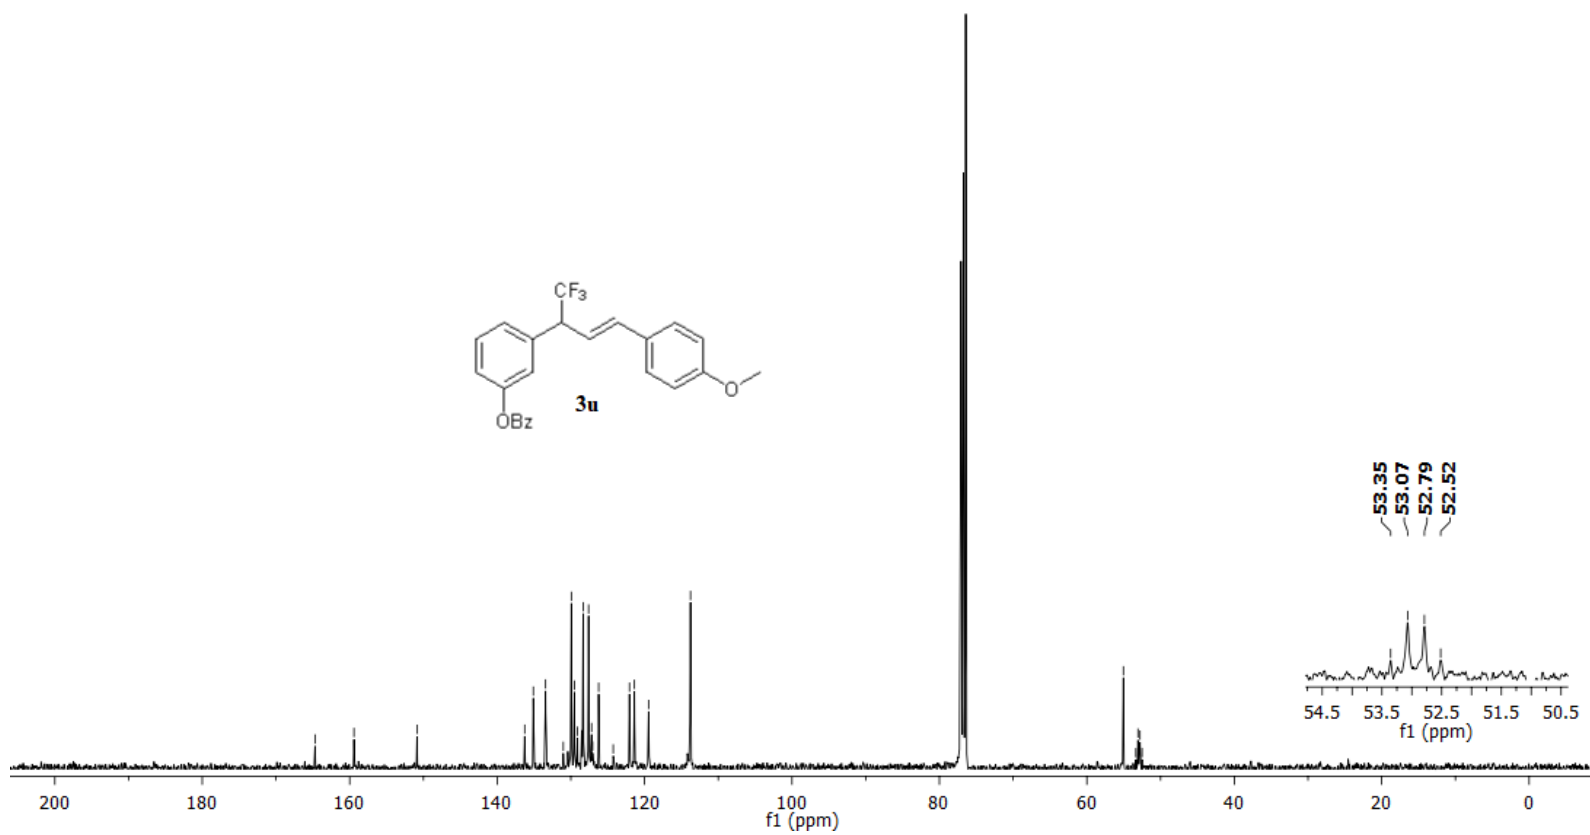

PROTON\_01  
04-23-109-e

<sup>1</sup>H NMR (400 MHz, CDCl<sub>3</sub>) of 3v

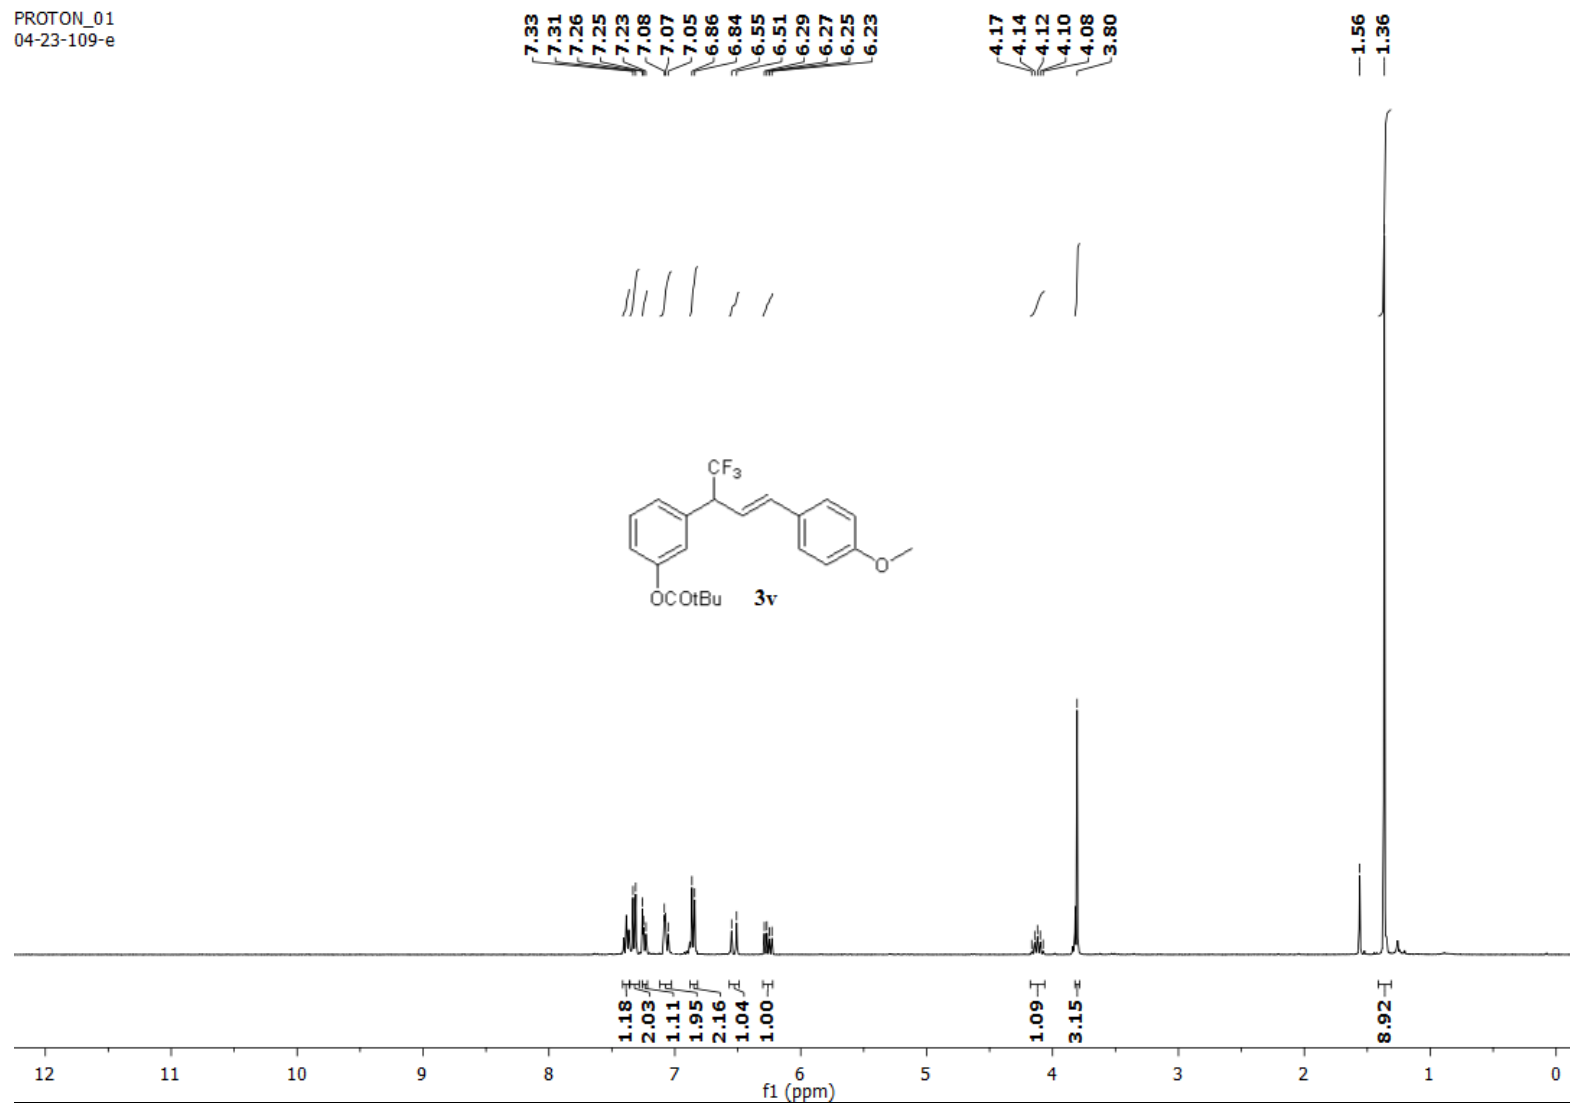



<sup>19</sup>F NMR (376 MHz, CDCl<sub>3</sub>) of 3v

FLUORINE\_01  
04-23-109-e

-68.89  
-68.91

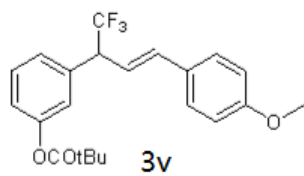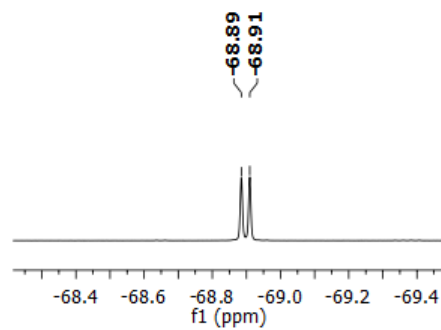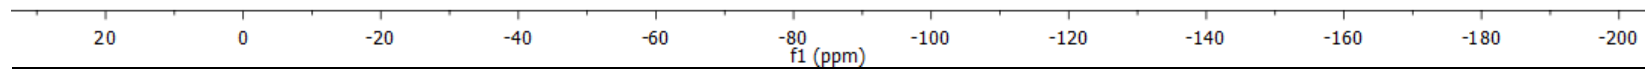

<sup>13</sup>C NMR (100 MHz, CDCl<sub>3</sub>) of 3v

CARBON\_01  
04-30-109-e

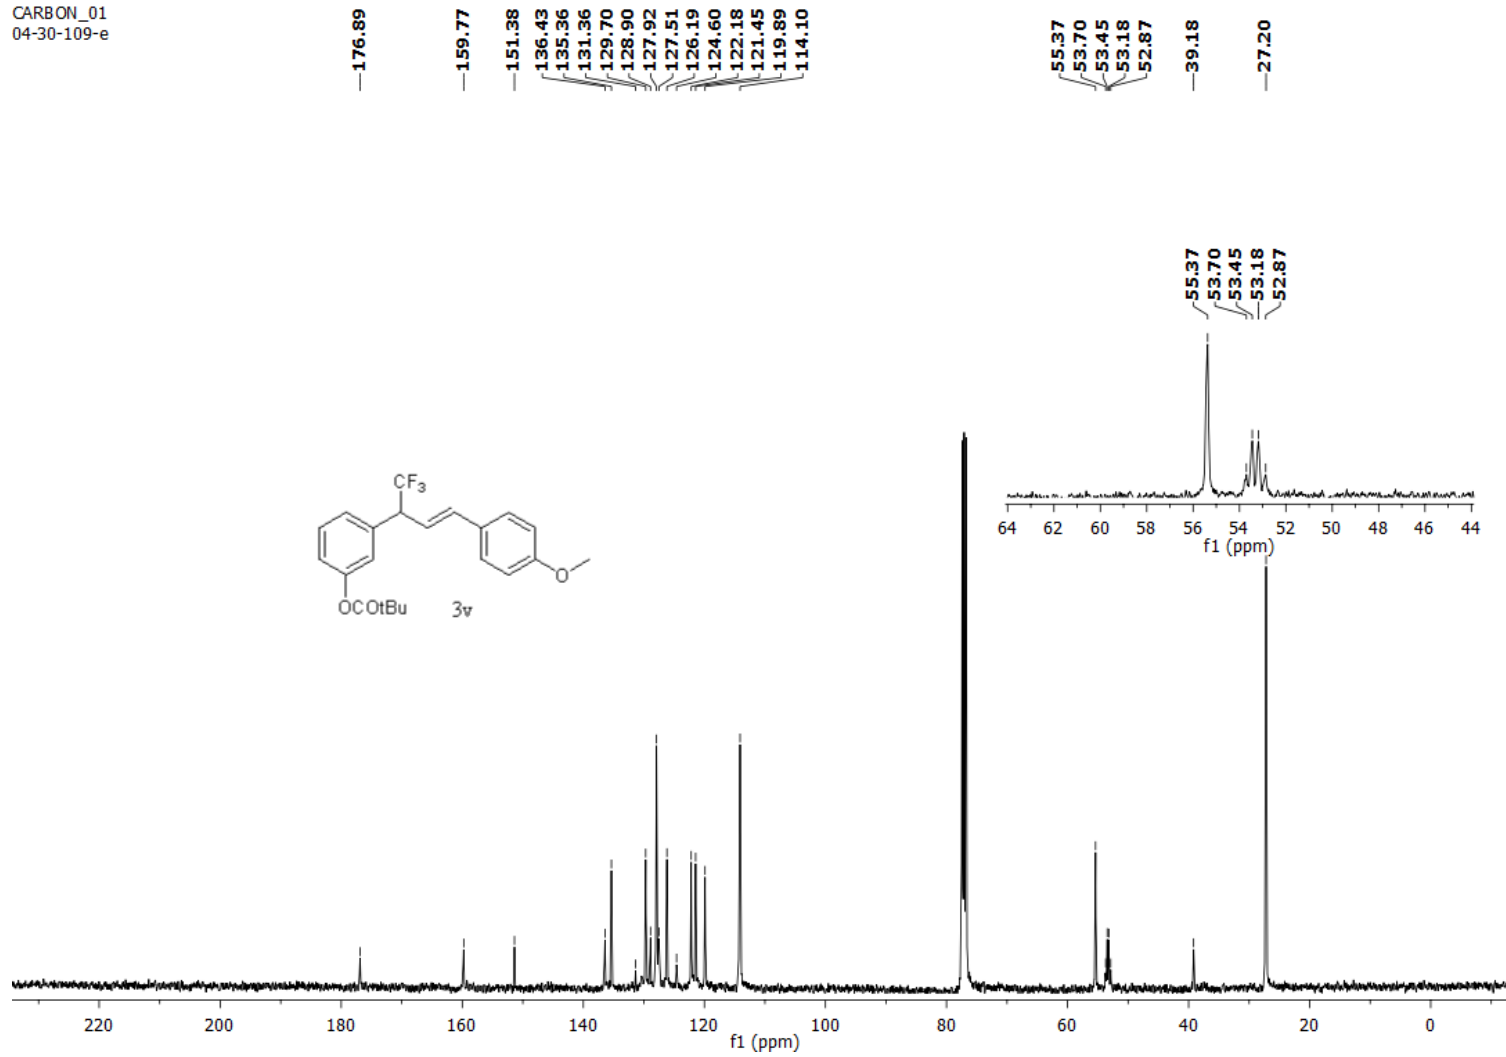

PROTON\_01  
04-30-109-k1

<sup>1</sup>H NMR (400 MHz, CDCl<sub>3</sub>) of 3w

7.42  
7.40  
7.39  
7.37  
7.36  
7.35  
7.33  
7.26  
7.03  
7.01  
6.99  
6.57  
6.53  
6.40  
6.38  
6.36  
6.34  
4.18  
4.16  
4.13  
4.11  
4.09  
—1.54

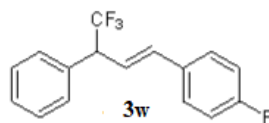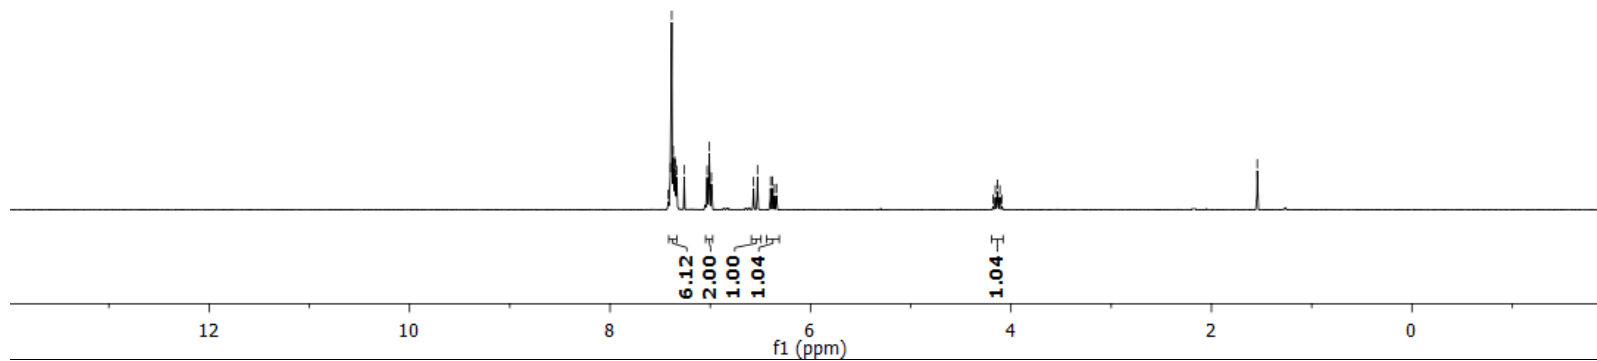

<sup>19</sup>F NMR (376 MHz, CDCl<sub>3</sub>) of 3w

FLUORINE\_01  
04-30-109-k1

-68.90  
-68.93

-113.54  
-113.55  
-113.57  
-113.58

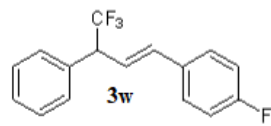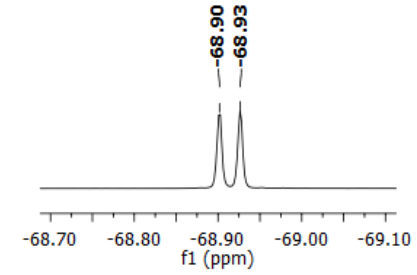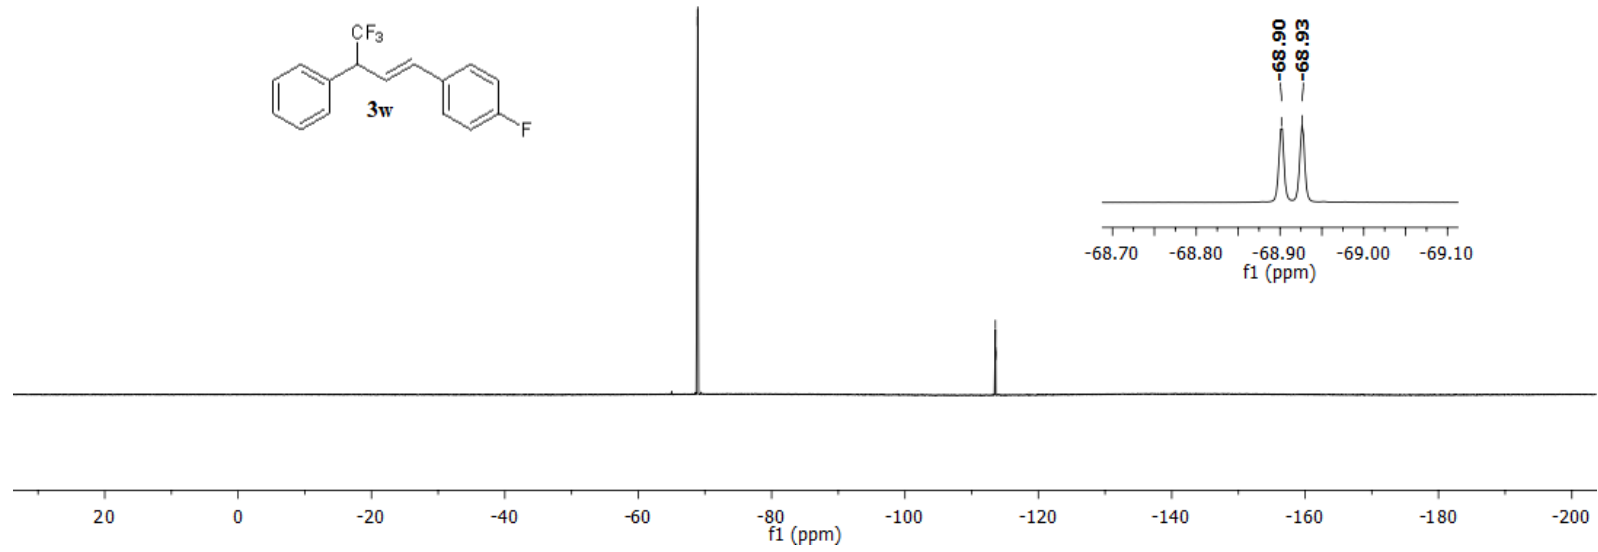

<sup>13</sup>C NMR (100 MHz, CDCl<sub>3</sub>) of 3w

CARBON\_01  
04-18-108-f

- 163.98
- 161.52
- 134.76
- 134.43
- 132.46
- 131.66
- 130.32
- 129.08
- 128.98
- 128.41
- 128.30
- 128.22
- 127.53
- 124.74
- 122.57
- 121.95
- 115.79
- 115.57

- 53.96
- 53.68
- 53.41
- 53.13

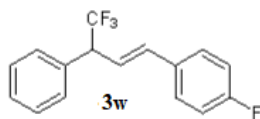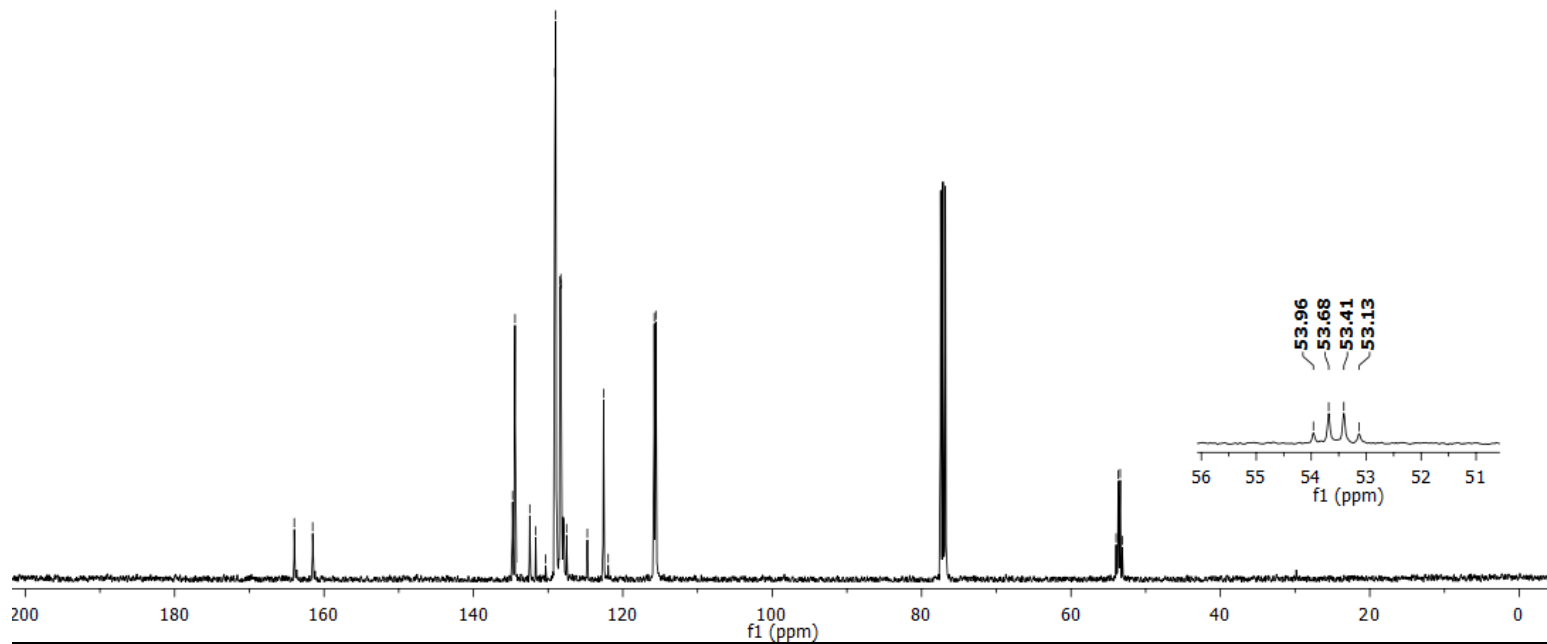

<sup>1</sup>H NMR (400 MHz, CDCl<sub>3</sub>) of 3x

PROTON\_01  
04-17-108-g

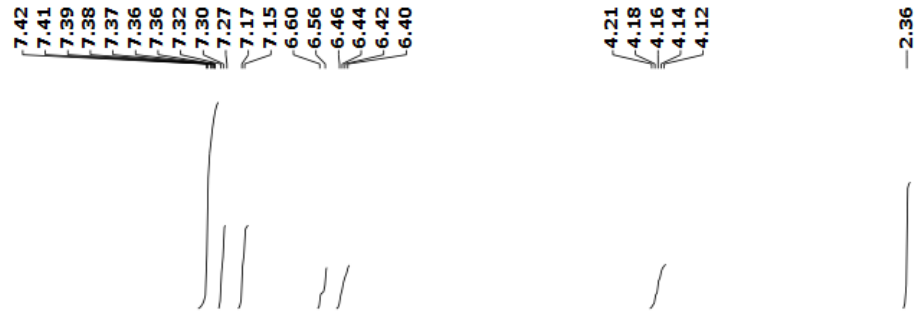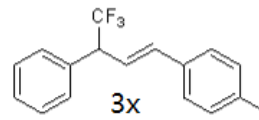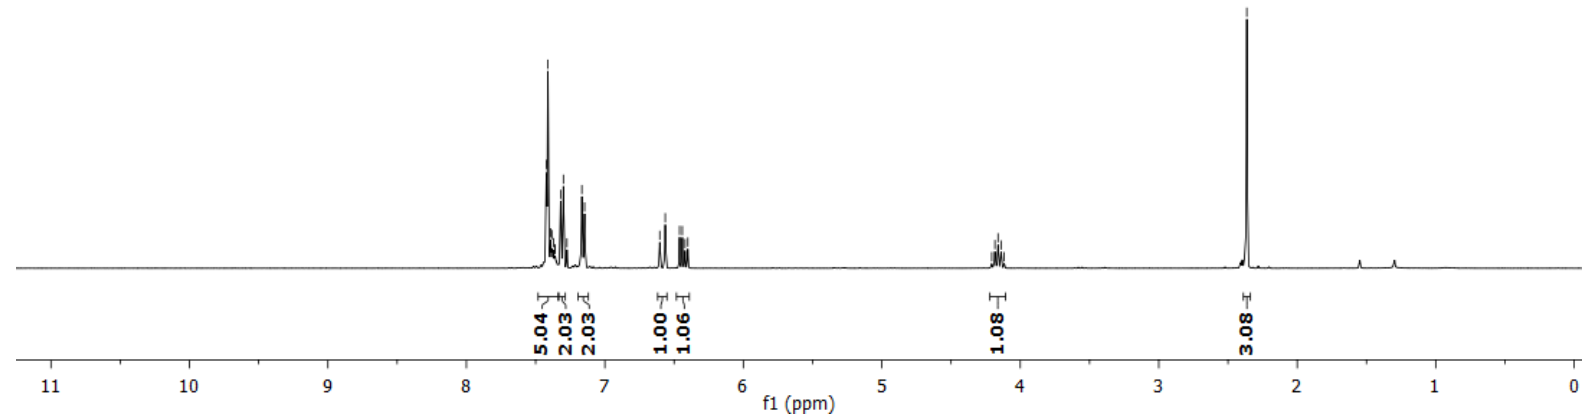

<sup>19</sup>F NMR (376 MHz, CDCl<sub>3</sub>) of 3x

FLUORINE\_01  
04-17-108-g

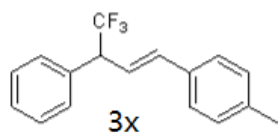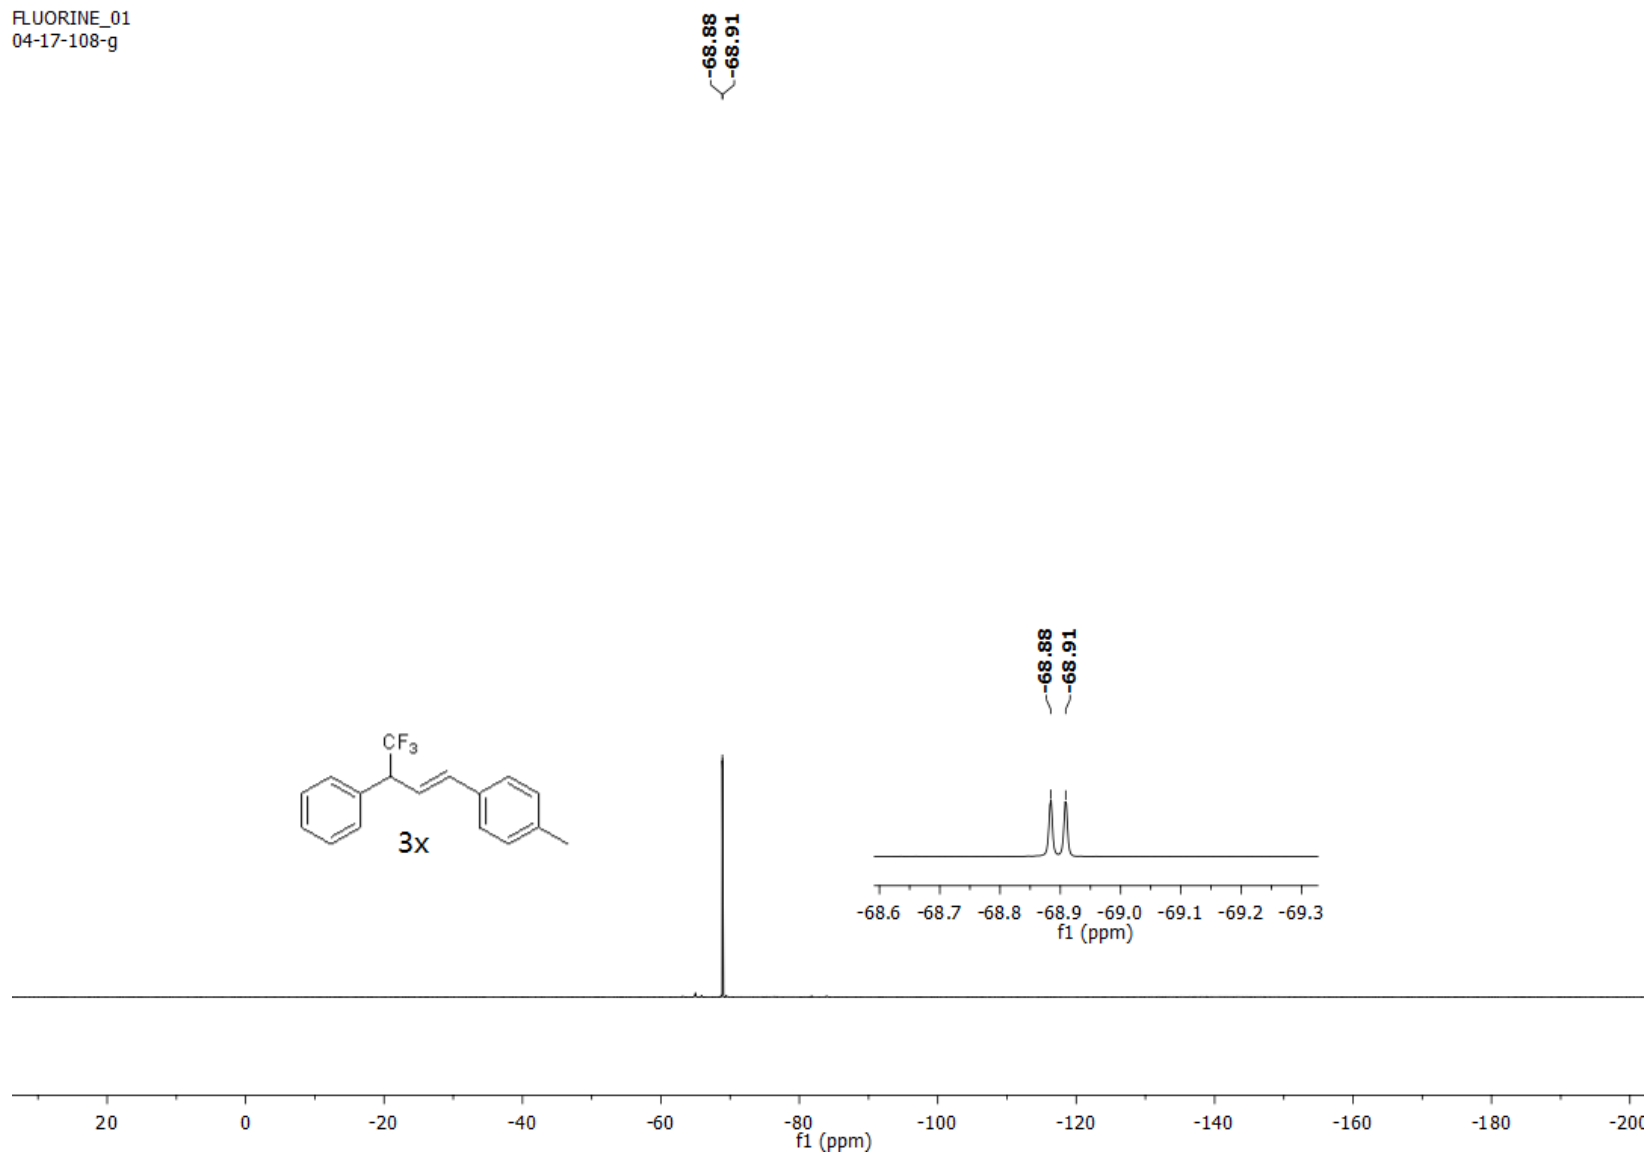

<sup>13</sup>C NMR (100 MHz, CDCl<sub>3</sub>) of 3x

CARBON\_01  
04-17-108-g

138.06  
135.35  
134.88  
133.39  
130.27  
129.29  
128.99  
128.78  
128.17  
127.49  
126.44  
124.69  
121.90  
121.57

53.87  
53.59  
53.31  
53.04

21.20

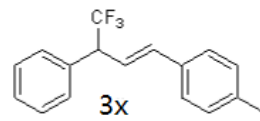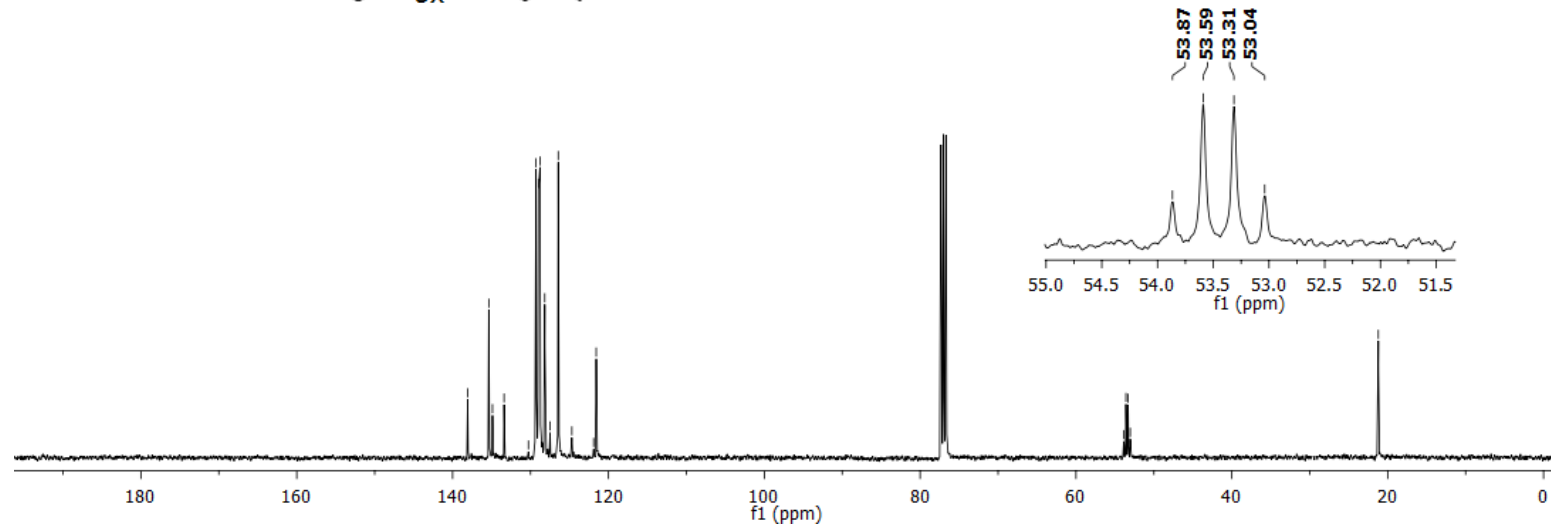



PROTON\_01  
04-30-109-p

<sup>1</sup>H NMR (400 MHz, CDCl<sub>3</sub>) of 3y

7.41 7.41 7.39 7.38 7.36 7.26 7.18 7.16 6.59 6.55 6.47 6.45 6.43 6.41 4.20 4.18 4.15 4.13 4.11

—1.54

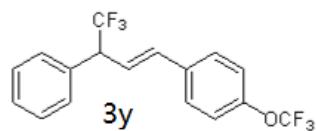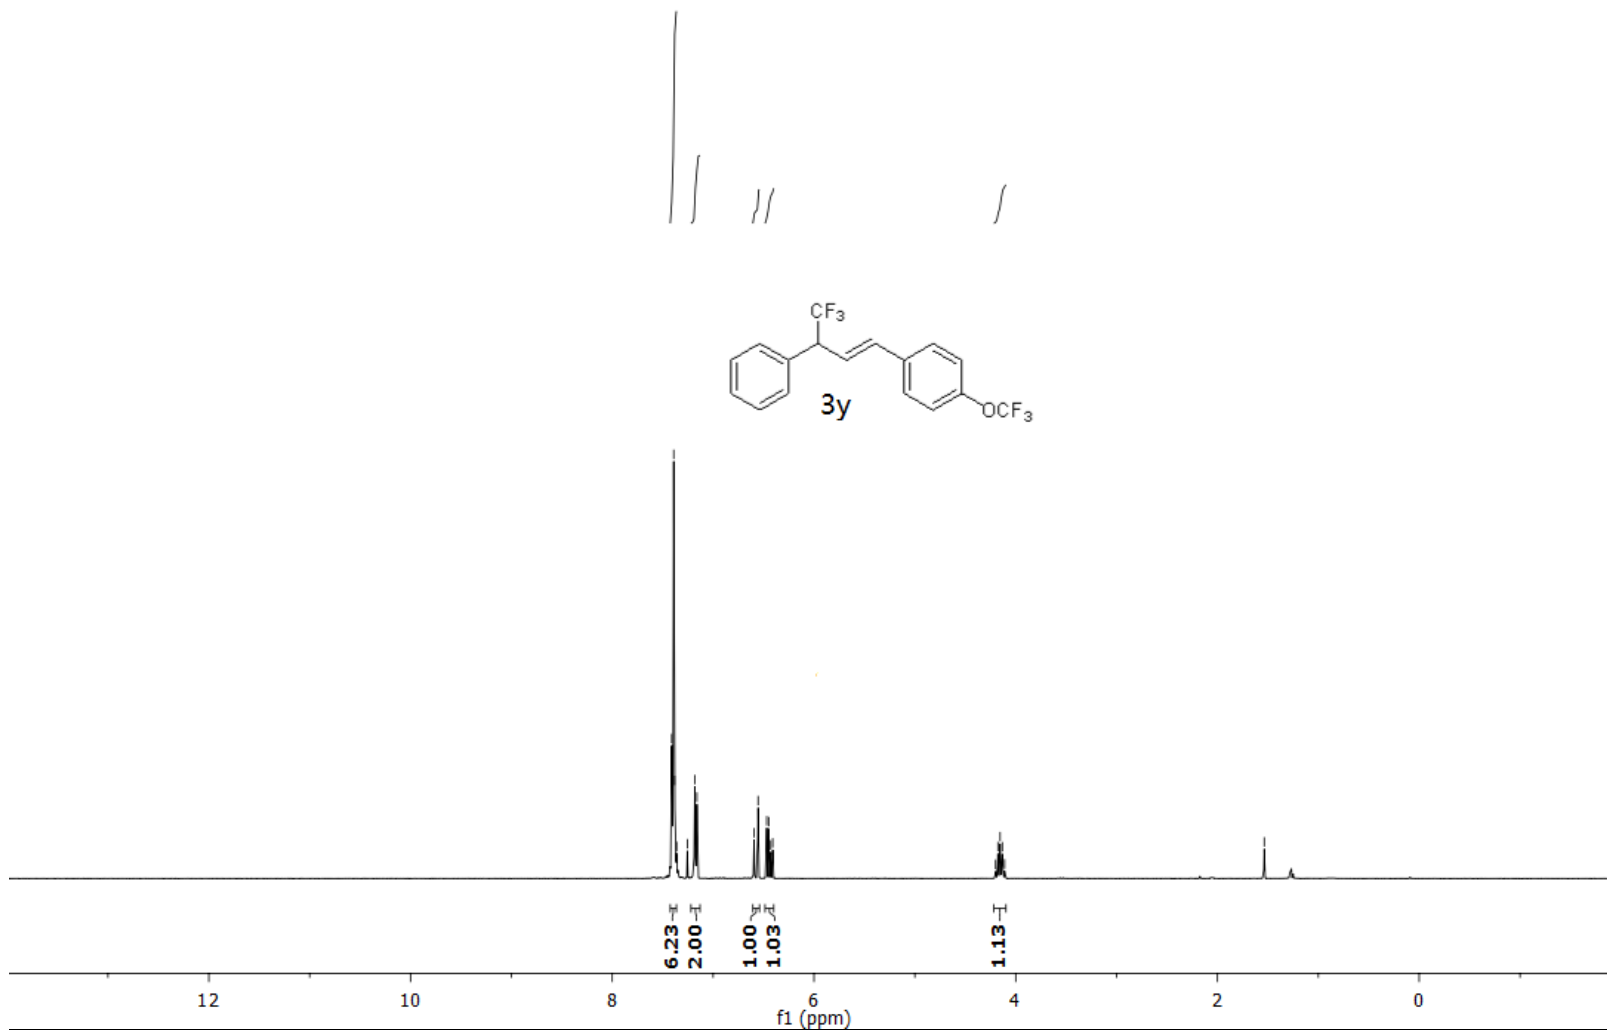

FLUORINE\_01  
04-30-109-p

$^{19}\text{F}$  NMR (376 MHz,  $\text{CDCl}_3$ ) of **3y**

-57.91  
-68.86  
-68.88

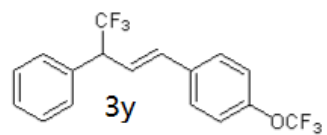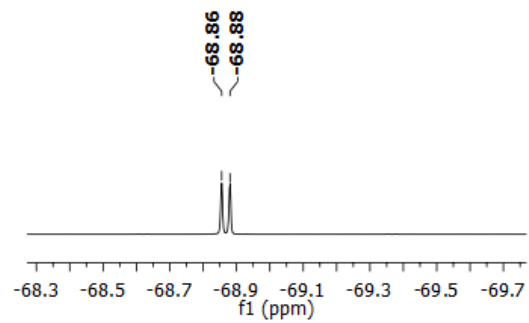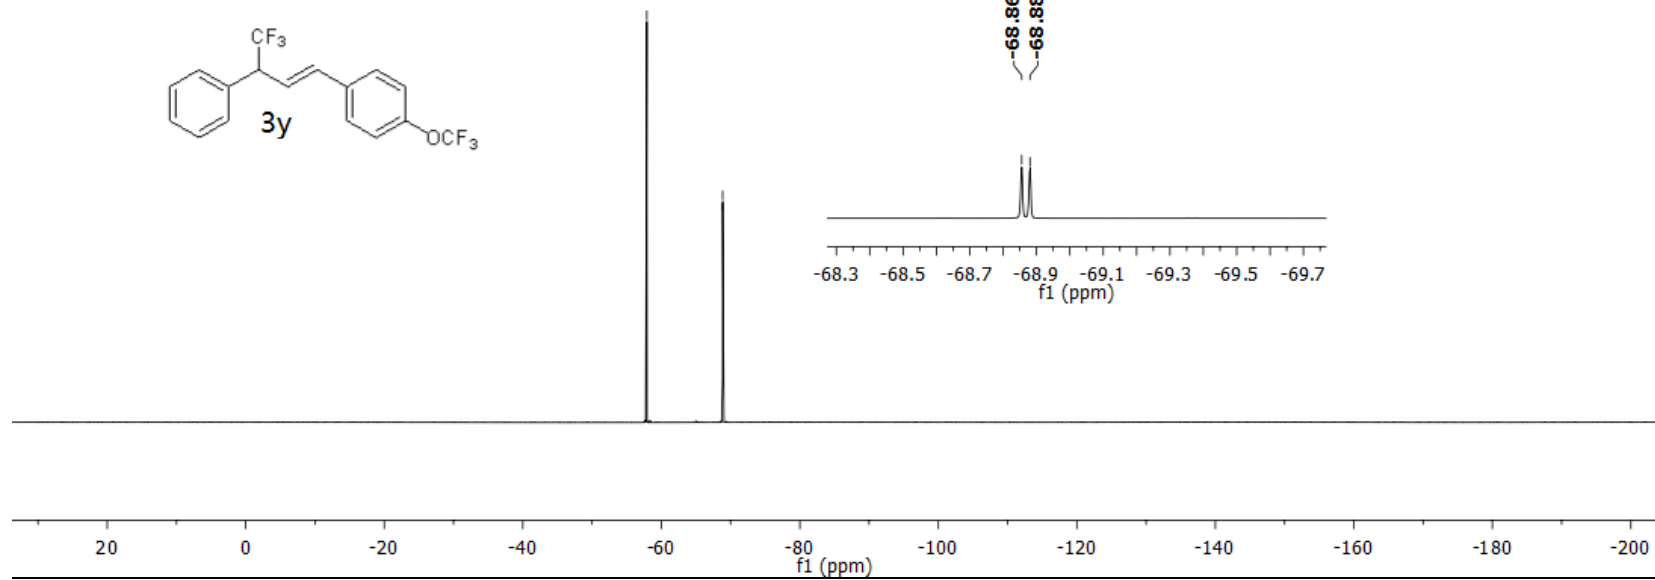

CARBON\_01  
05-05-109-p

$^{13}\text{C}$  NMR (100 MHz,  $\text{CDCl}_3$ ) of 3w

148.61  
134.57  
134.11  
133.68  
129.81  
128.61  
128.02  
127.50  
127.01  
124.23  
123.95  
123.50  
121.40  
118.83  
116.30

53.47  
53.20  
52.93  
52.65

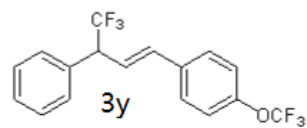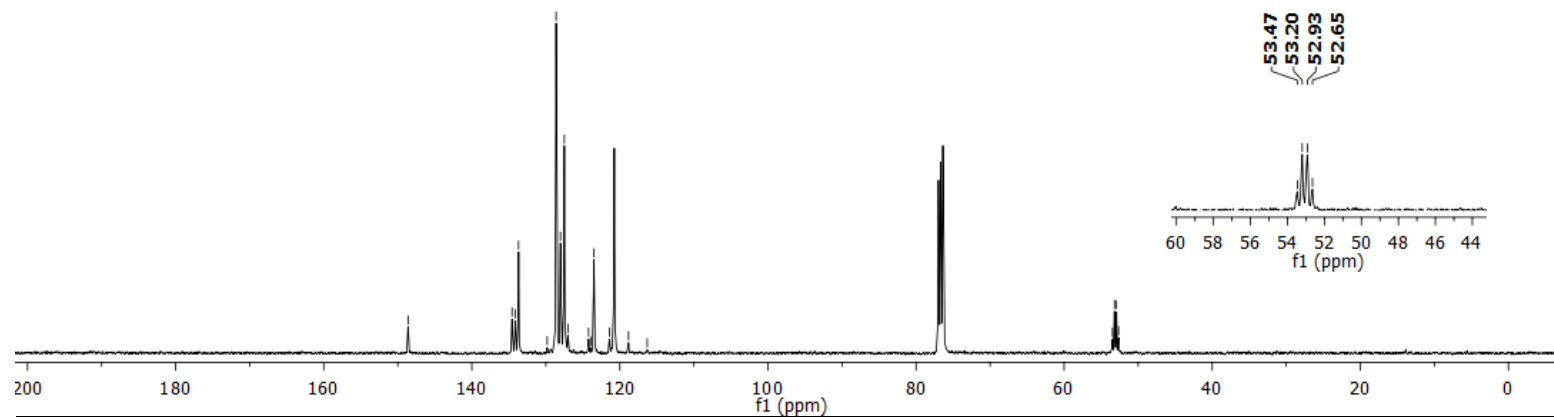

PROTON\_01  
04-17-108-k

<sup>1</sup>H NMR (400 MHz, CDCl<sub>3</sub>) of 3z

7.40  
7.39  
7.25  
7.24  
7.22  
7.21  
7.20  
7.18  
7.18  
7.09  
7.08  
7.06  
7.04  
7.02  
6.87  
6.83  
6.32  
6.30  
6.28  
6.26  
4.10  
4.08  
4.06  
4.03  
4.01

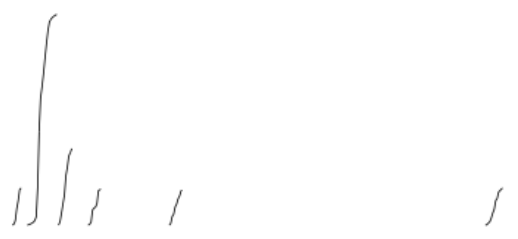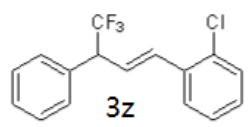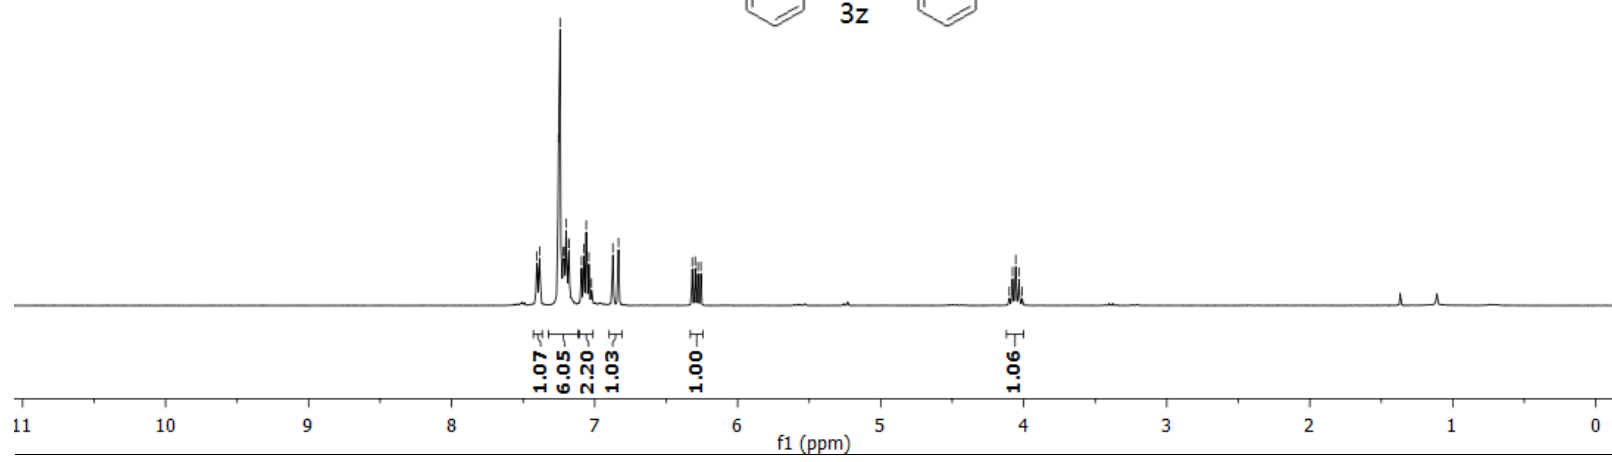

<sup>19</sup>F NMR (376 MHz, CDCl<sub>3</sub>) of 3z

FLUORINE\_01  
04-30-109-r

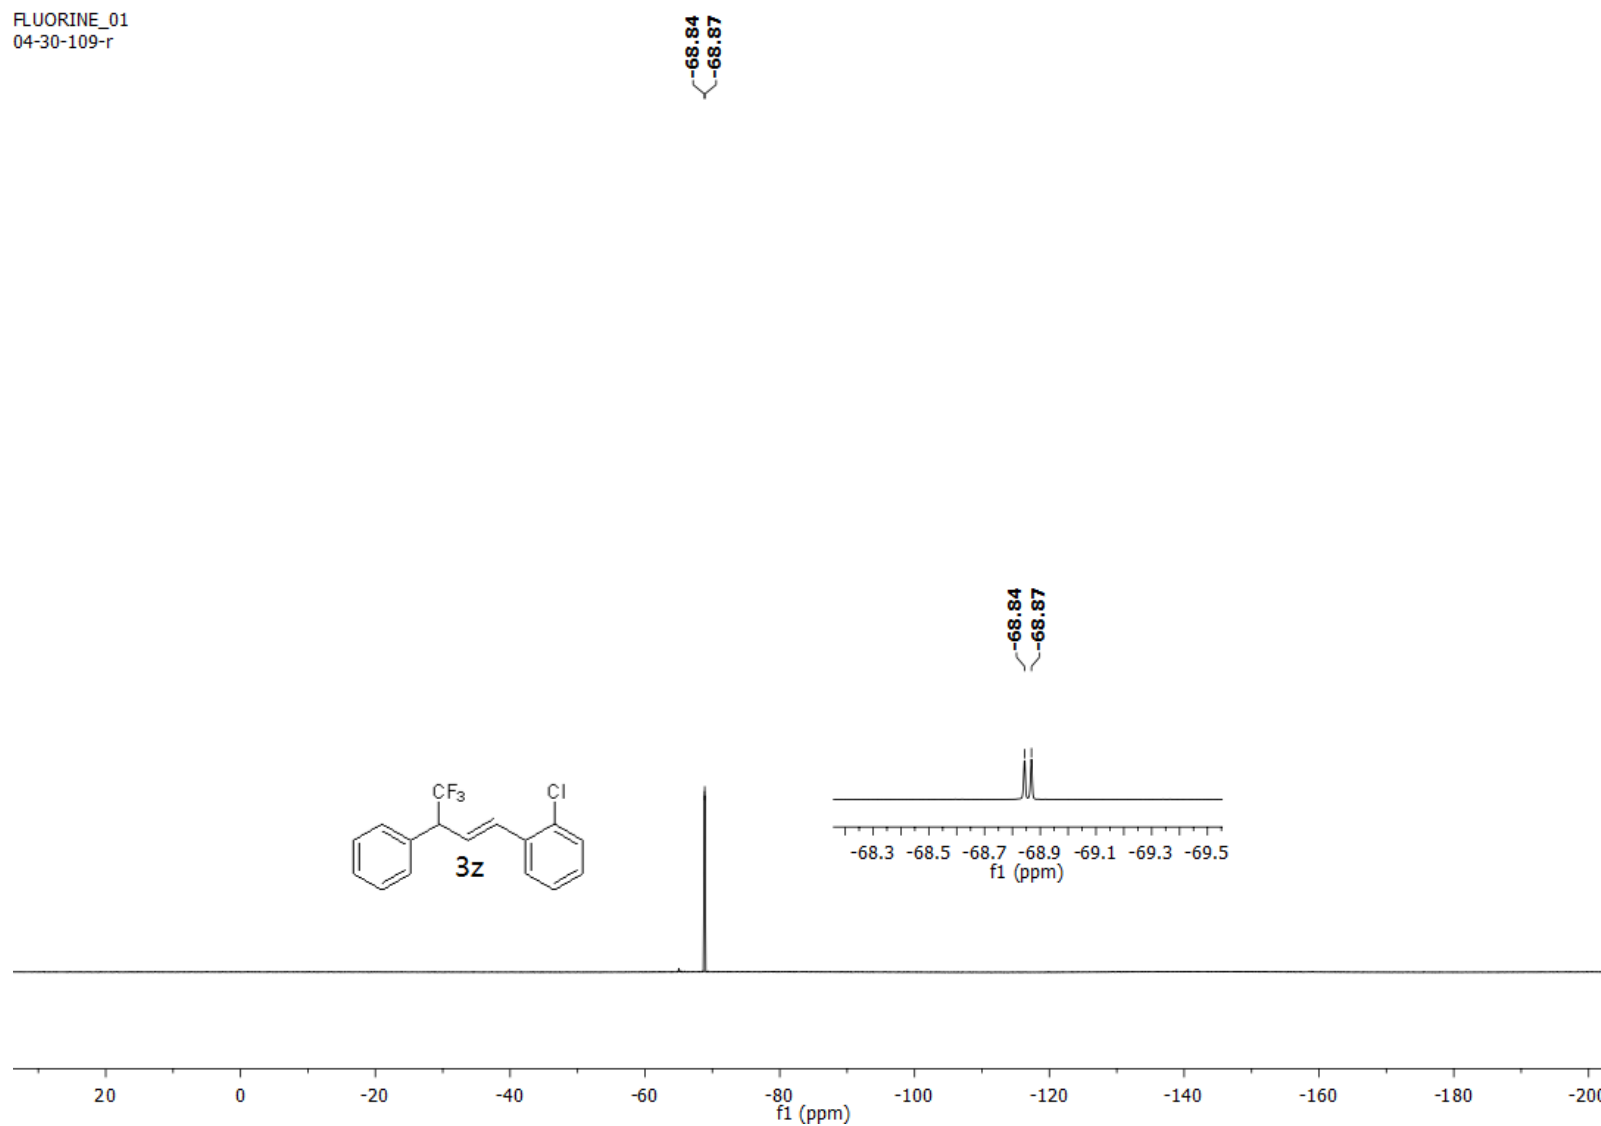

<sup>13</sup>C NMR (100 MHz, CDCl<sub>3</sub>) of 3z

CARBON\_01  
04-17-108-k

134.26  
134.18  
133.05  
131.71  
129.93  
129.55  
128.98  
128.79  
128.69  
128.15  
127.14  
126.80  
126.71  
125.22  
124.35  
121.55

53.79  
53.51  
53.23  
52.96

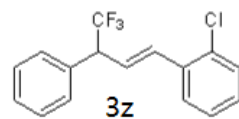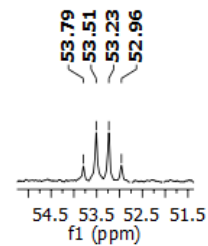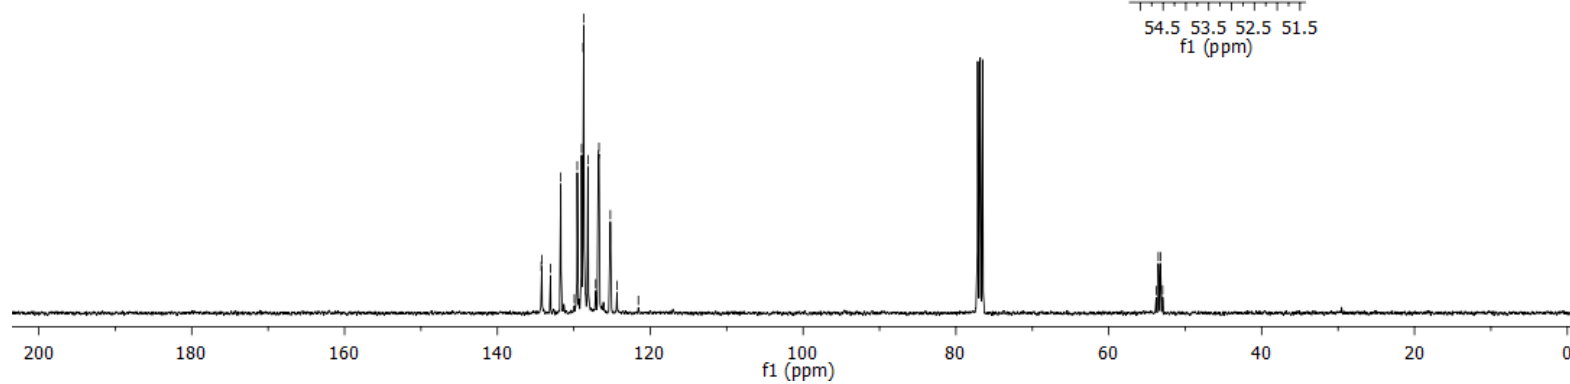

<sup>1</sup>H NMR (400 MHz, CDCl<sub>3</sub>) of 4a

PROTON\_01  
06-09-112-a3

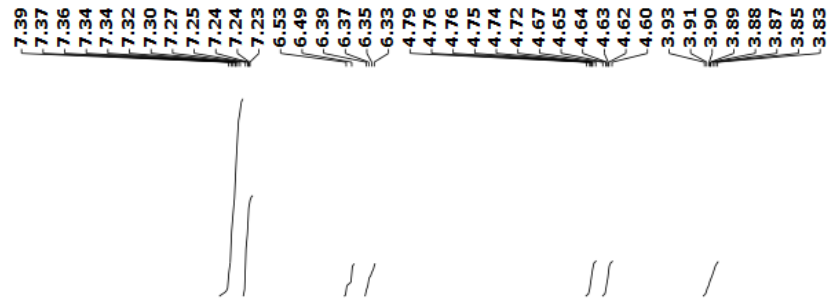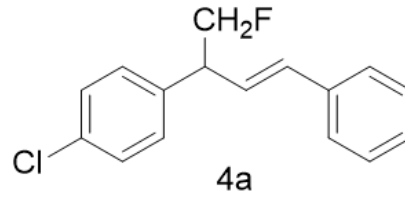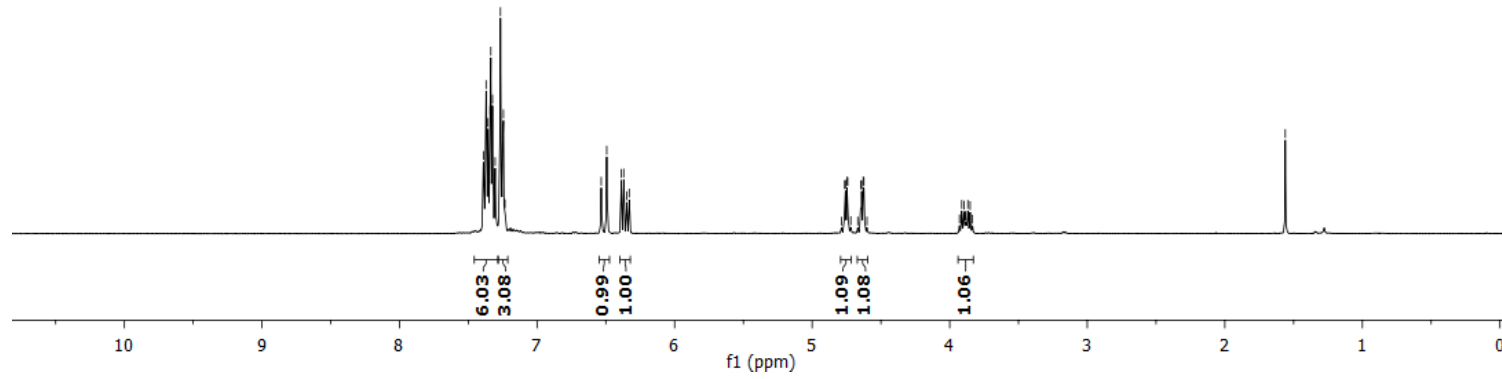

<sup>19</sup>F NMR (376 MHz, CDCl<sub>3</sub>) of 4a

FLUORINE\_01  
STANDARD FLUORINE PARAMETERS

-217.51  
-217.56  
-217.64  
-217.68  
-217.76  
-217.81

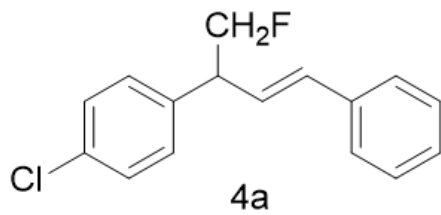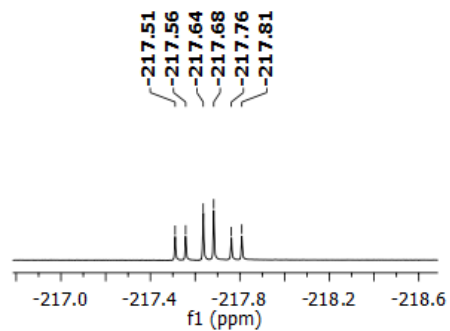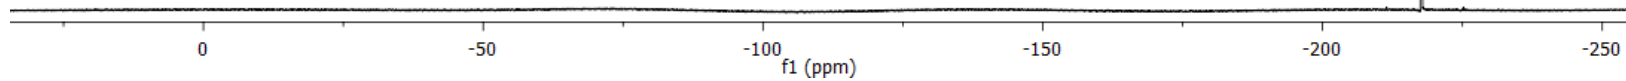



<sup>13</sup>C NMR (100 MHz, CDCl<sub>3</sub>) of 4a

CARBON\_02  
06-09-112-a3

138.13  
138.09  
136.65  
132.89  
132.51  
129.38  
128.78  
128.47  
127.59  
126.20

86.26  
84.51

48.65  
48.46

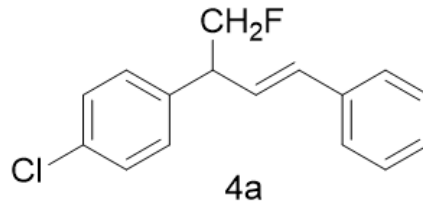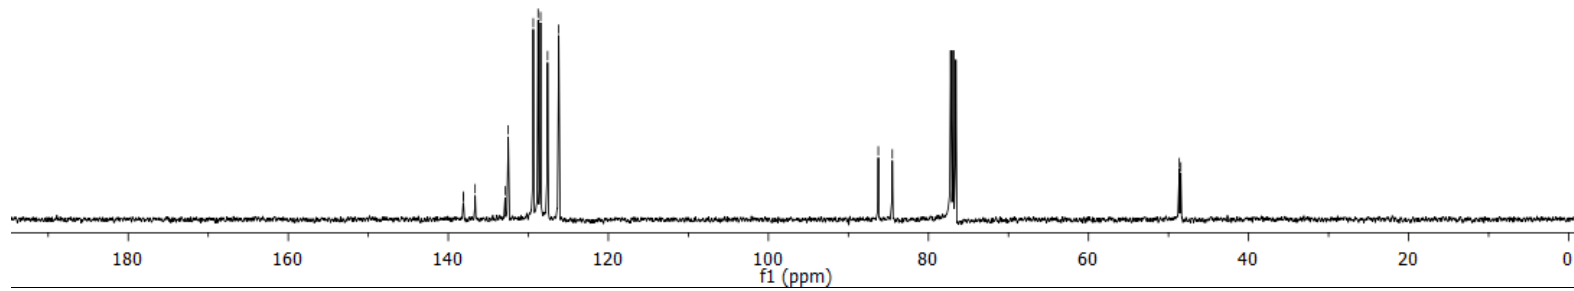

<sup>1</sup>H NMR (400 MHz, CDCl<sub>3</sub>) of 4b

PROTON\_01  
06-14-113-a

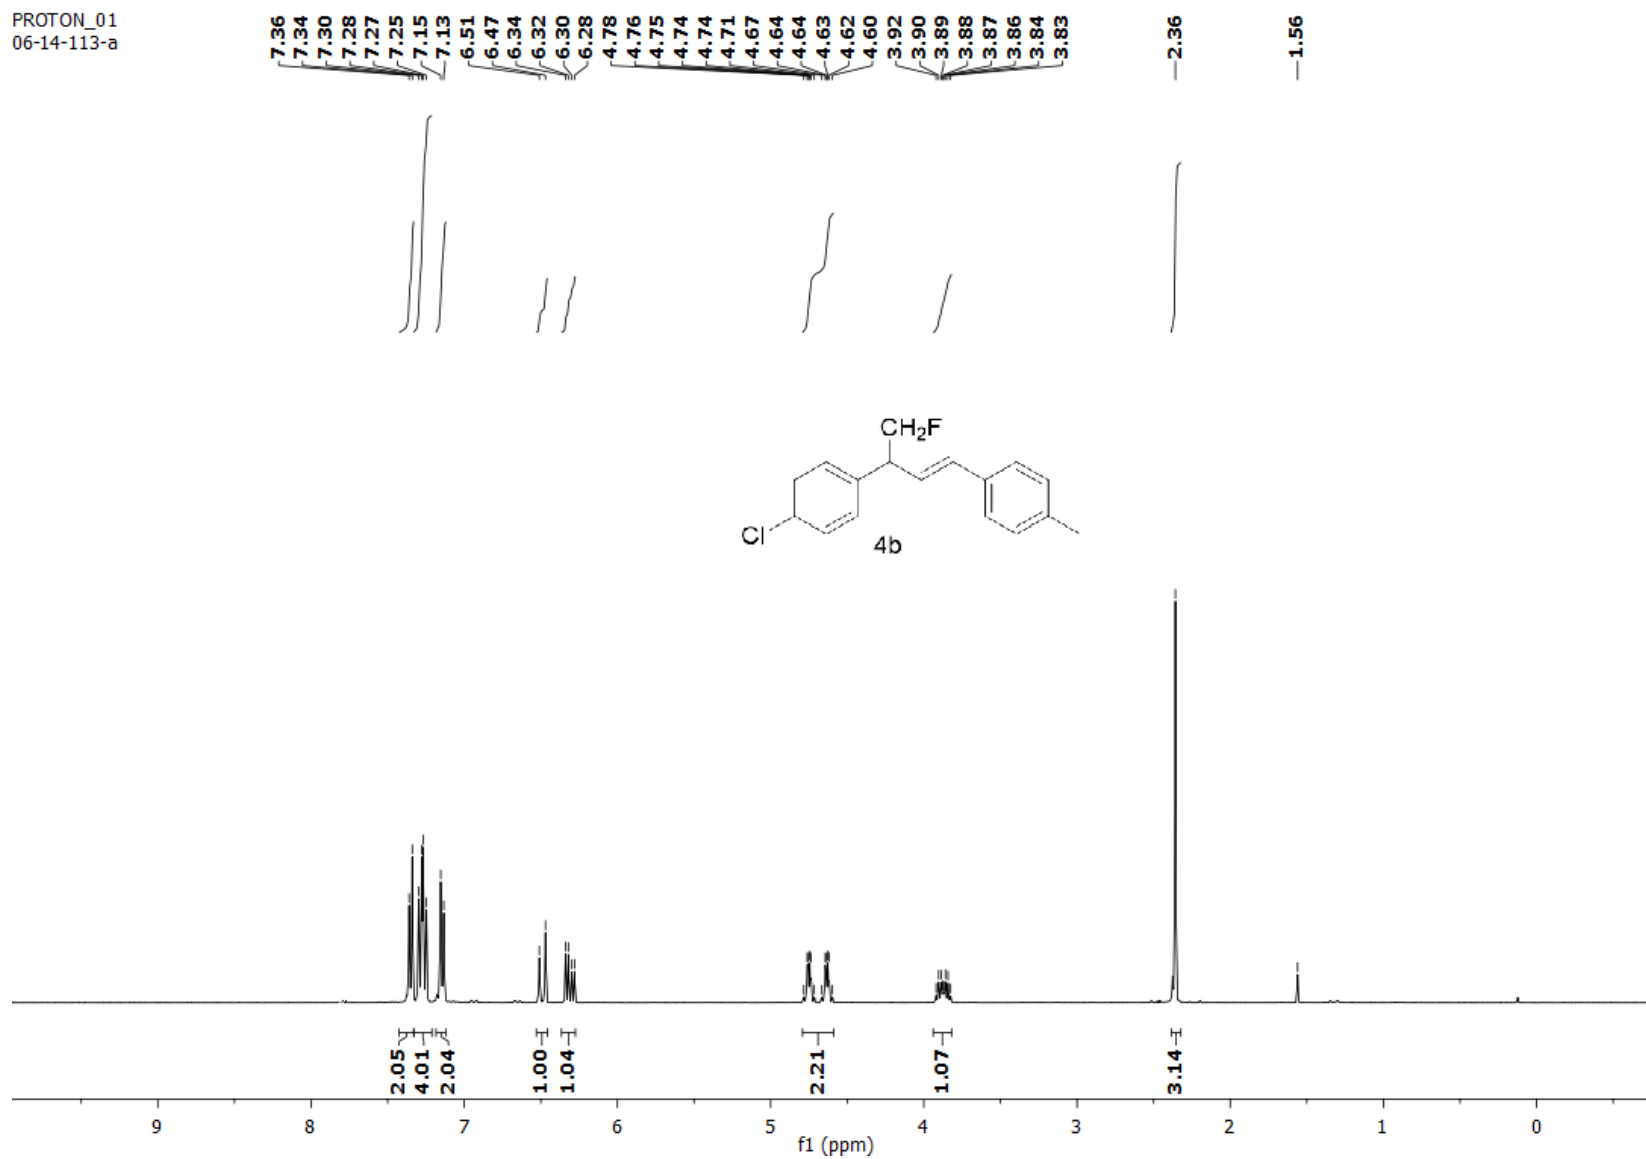

<sup>19</sup>F NMR (376 MHz, CDCl<sub>3</sub>) of 4b

FLUORINE\_01  
STANDARD FLUORINE PARAMETERS

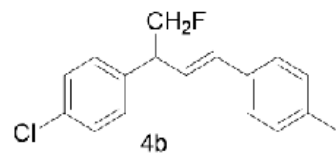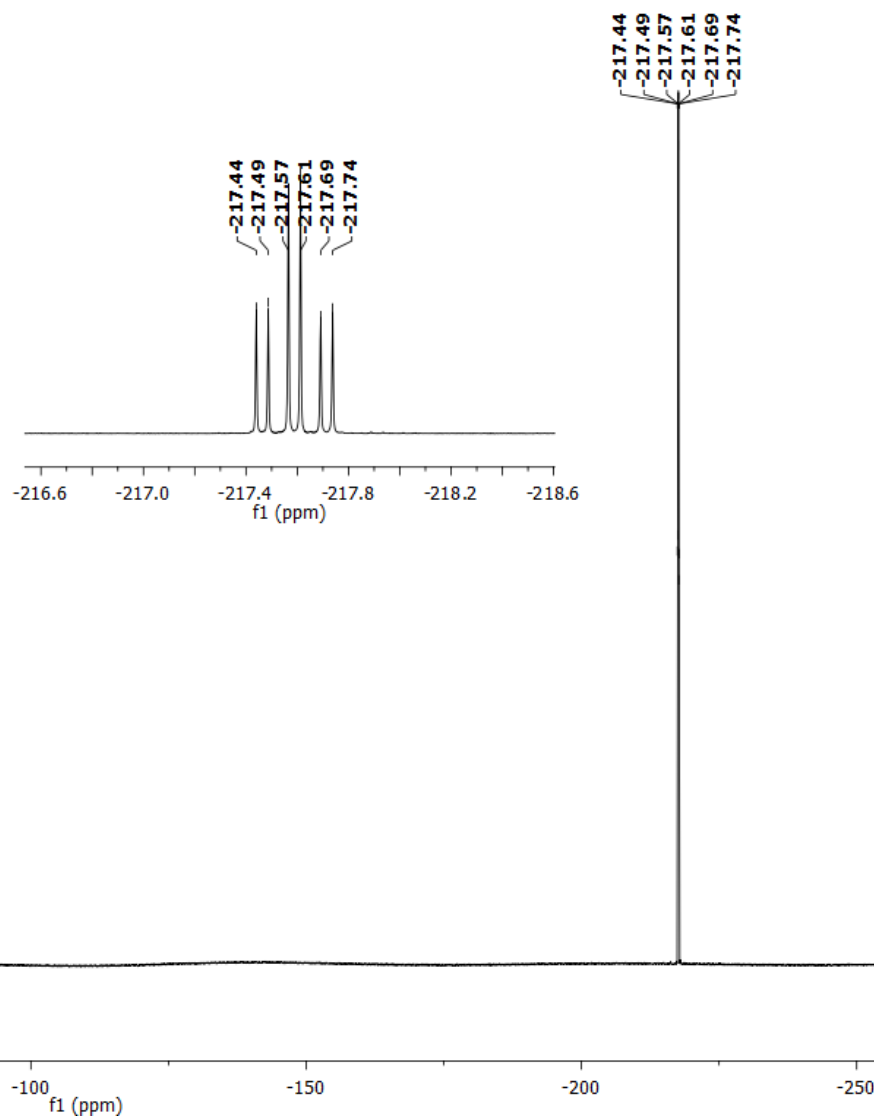

<sup>13</sup>C NMR (100 MHz, CDCl<sub>3</sub>) of 4b

CARBON\_01  
06-14-113-a

138.42  
138.38  
137.58  
133.98  
132.94  
132.48  
129.53  
129.31  
128.88  
126.59  
126.54  
126.24

86.46  
84.71

48.78  
48.58

21.21

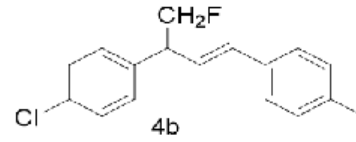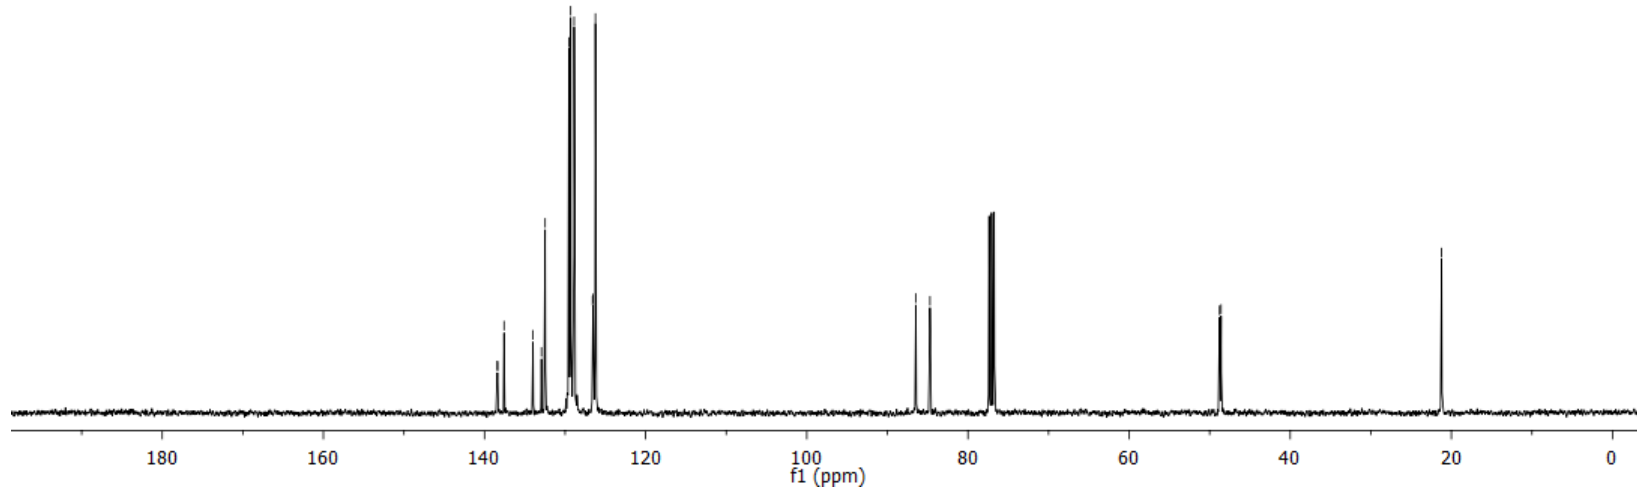

PROTON\_01  
06-11-112-e

<sup>1</sup>H NMR (400 MHz, CDCl<sub>3</sub>) of 4c

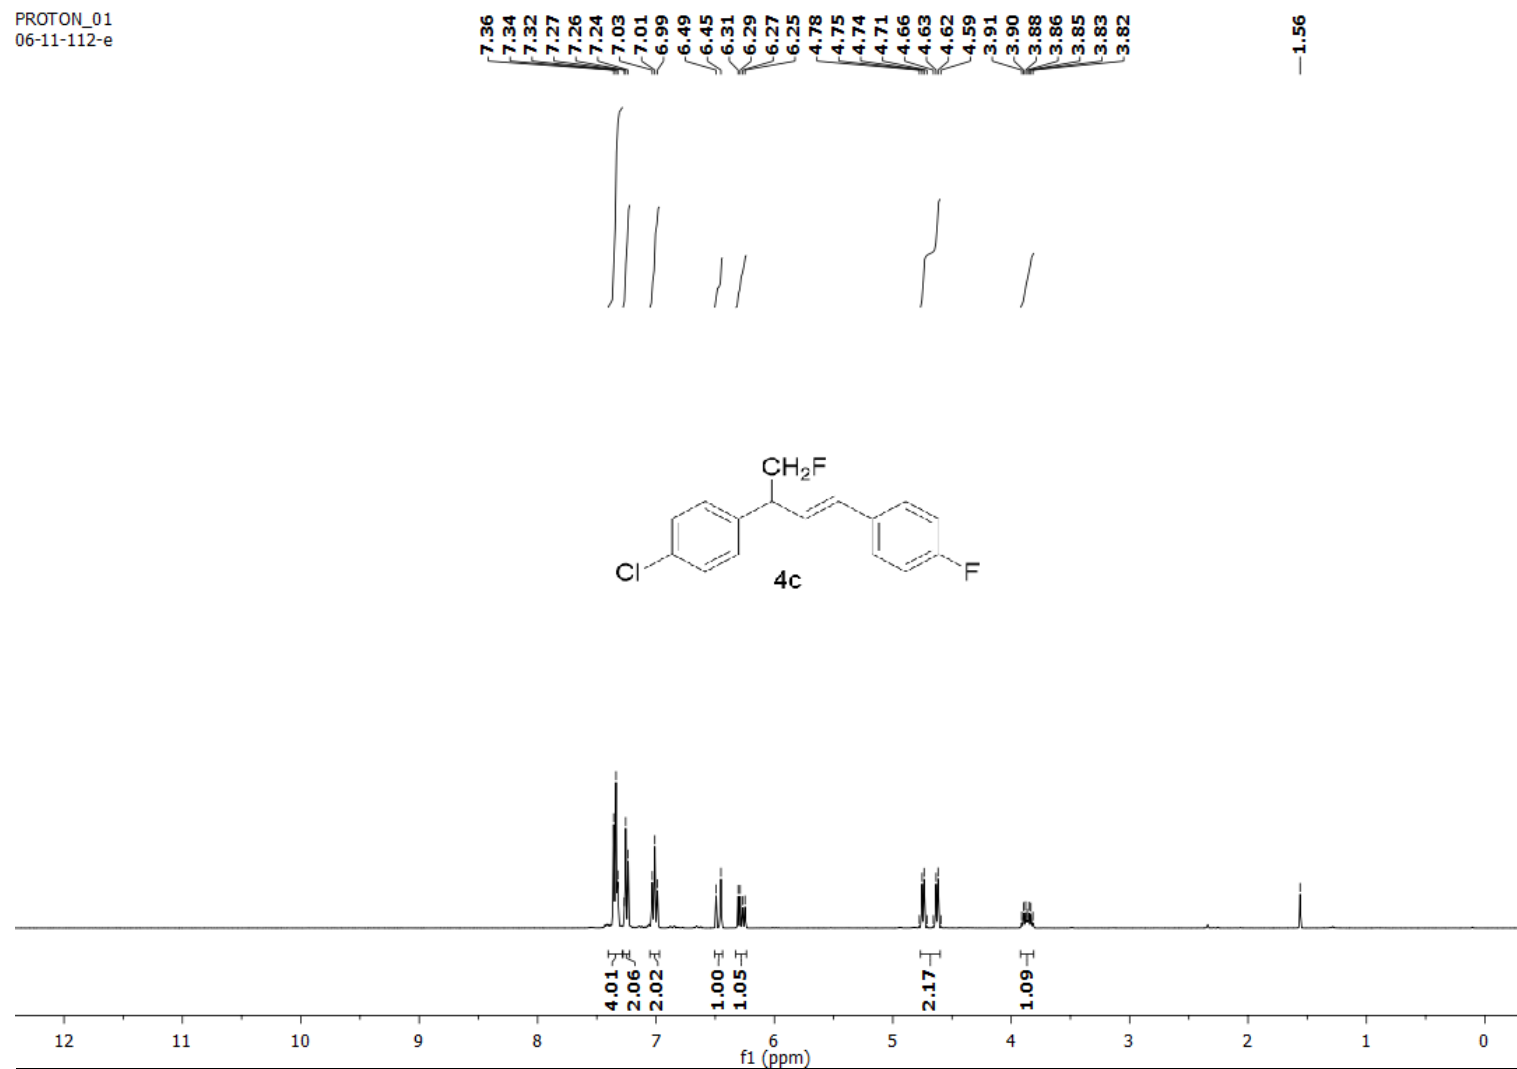

<sup>19</sup>F NMR (376 MHz, CDCl<sub>3</sub>) of 4c

FLUORINE\_01  
STANDARD FLUORINE PARAMETERS

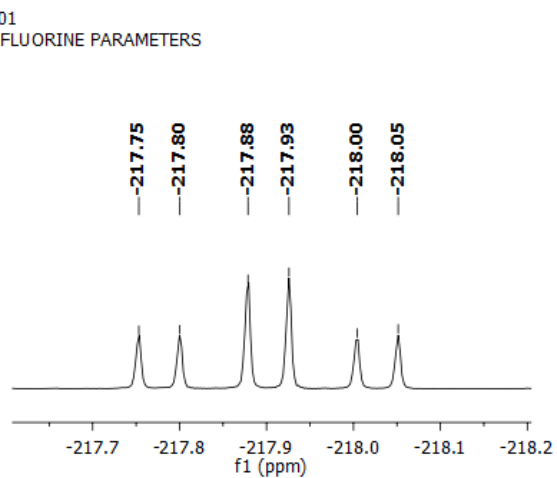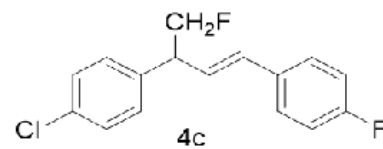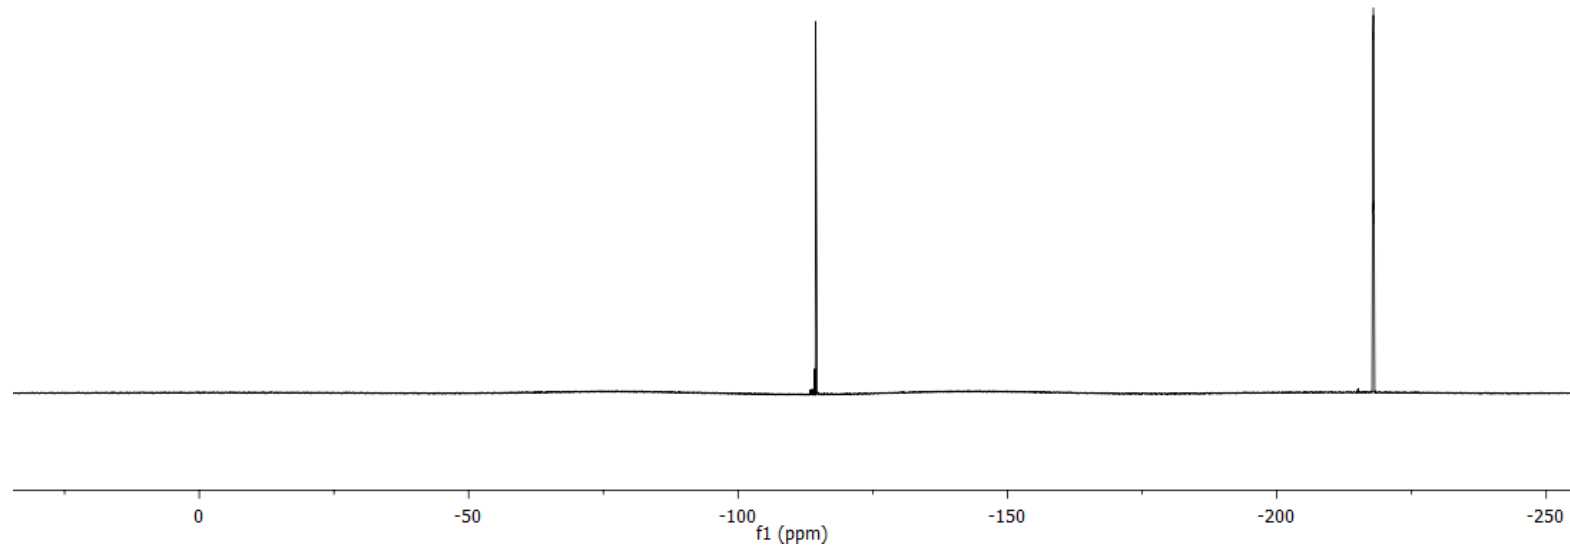

<sup>13</sup>C NMR (100 MHz, CDCl<sub>3</sub>) of 4c

CARBON\_01  
06-11-112-e

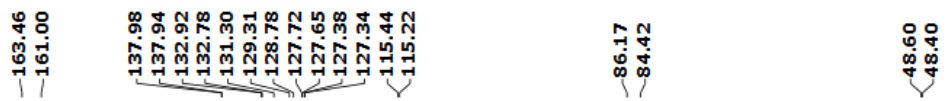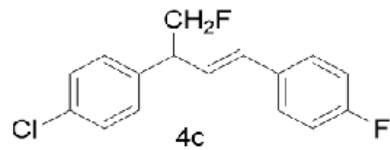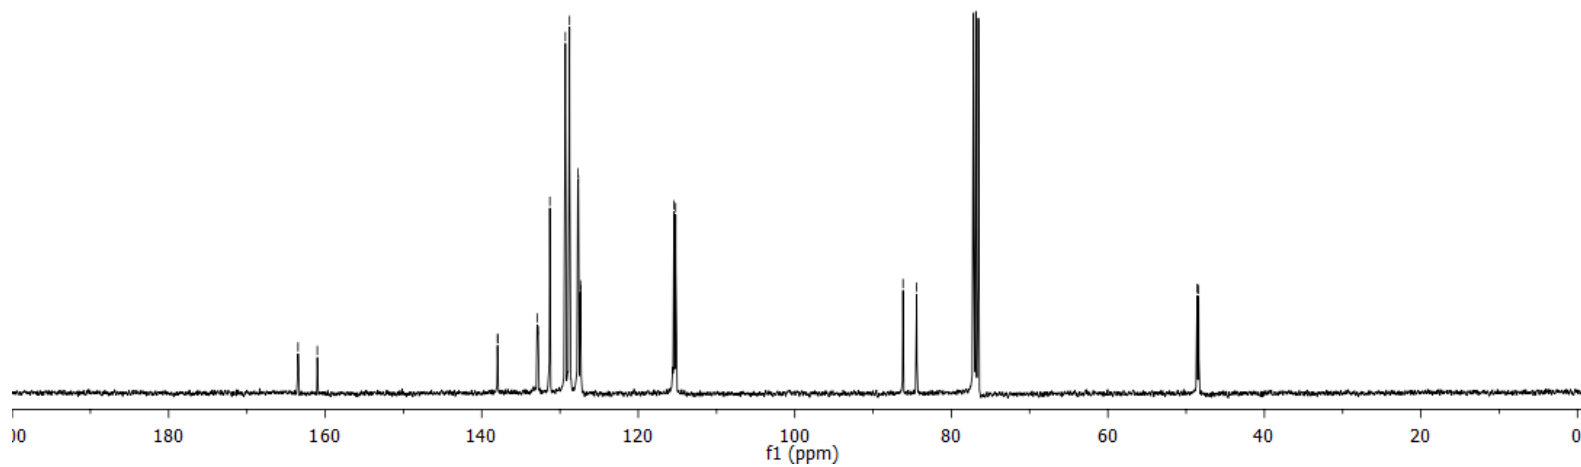

PROTON\_01  
06-11-112-g

<sup>1</sup>H NMR (400 MHz, CDCl<sub>3</sub>) of 4d

7.40 7.38 7.36 7.34 7.27 7.26 7.23 7.18 7.16 6.52 6.48 6.38 6.37 6.34 6.32 4.76 4.74 4.64 4.62 3.93 3.91 3.89 3.88 3.87 3.85 3.83 —1.56

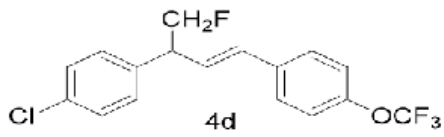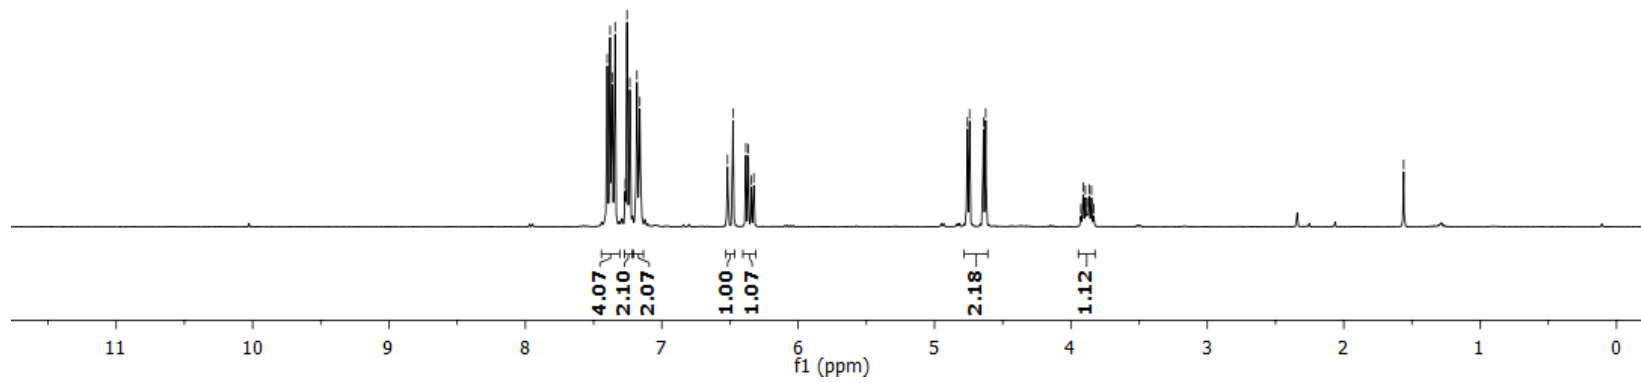



<sup>19</sup>F NMR (376 MHz, CDCl<sub>3</sub>) of 4d

FLUORINE\_01  
STANDARD FLUORINE PARAMETERS

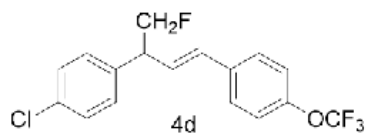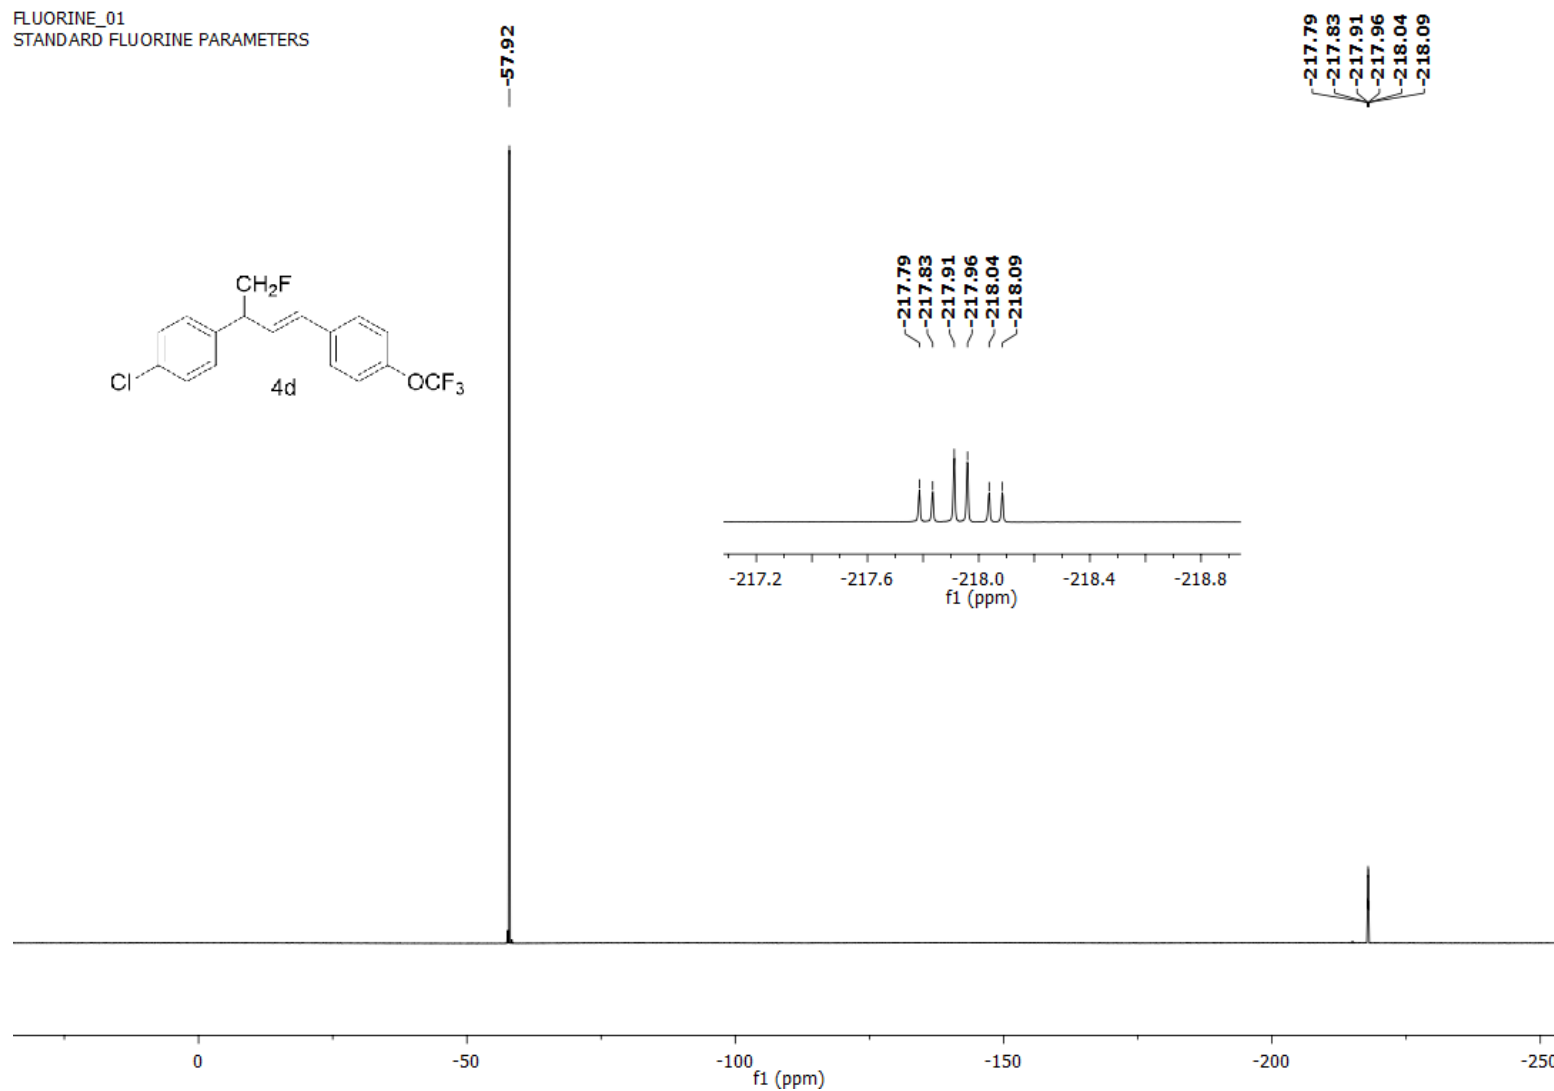

<sup>13</sup>C NMR (100 MHz, CDCl<sub>3</sub>) of 4d

CARBON\_01  
06-11-112-g

148.58  
137.87  
137.82  
135.51  
133.13  
131.14  
129.42  
128.93  
128.86  
127.52  
124.28  
121.72  
121.03  
119.16  
116.60  
86.19  
84.44  
48.71  
48.51

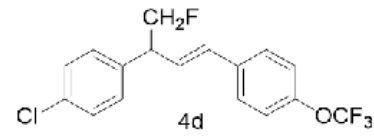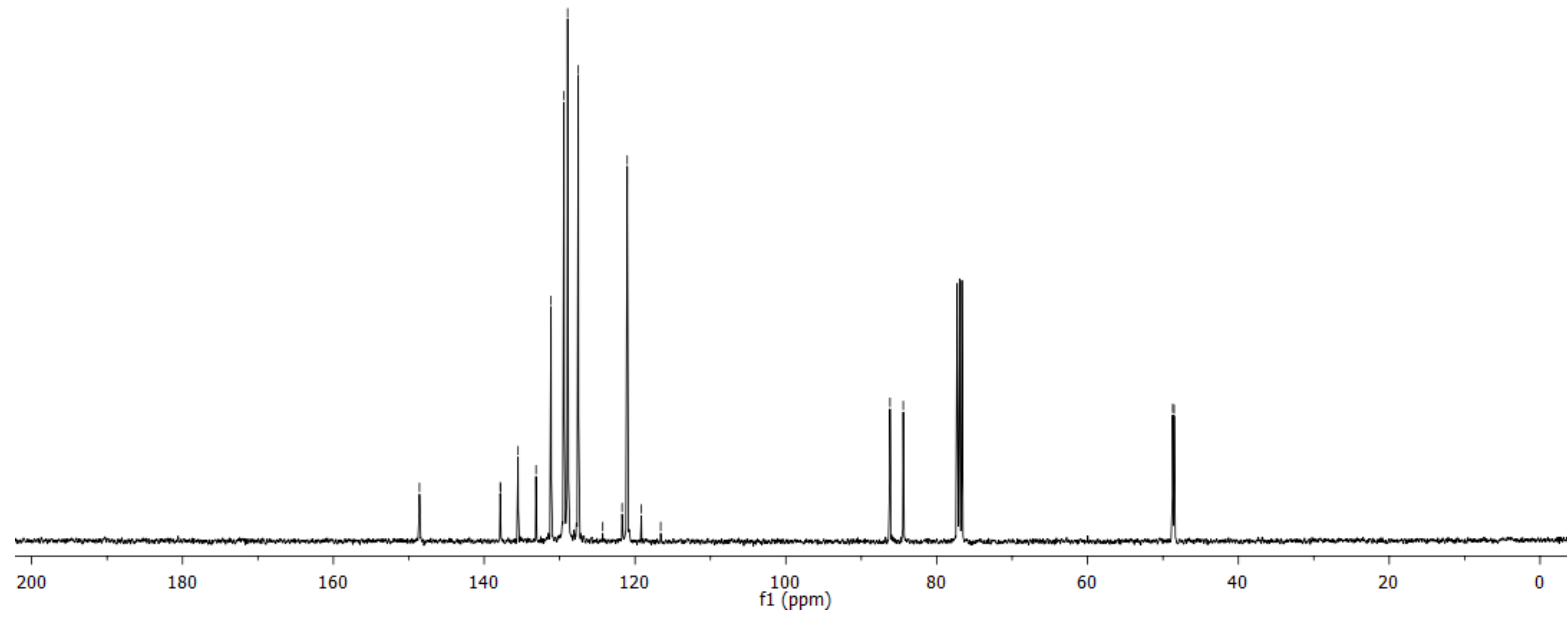

<sup>1</sup>H NMR (400 MHz, CDCl<sub>3</sub>) of 4e

PROTON\_01  
06-12-112-h

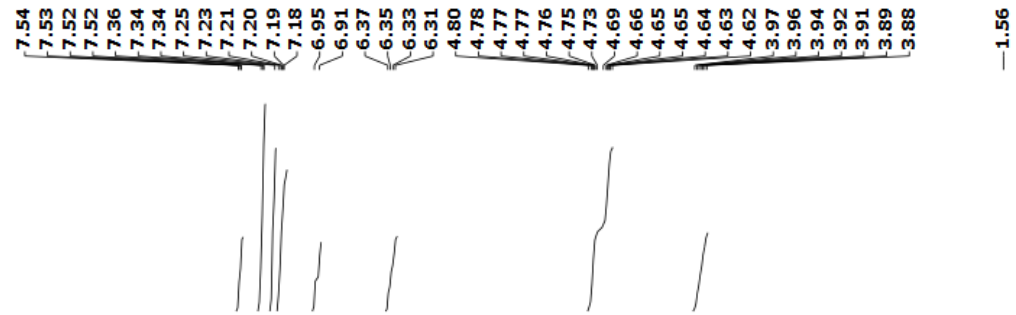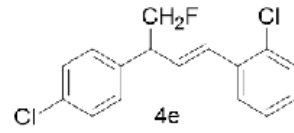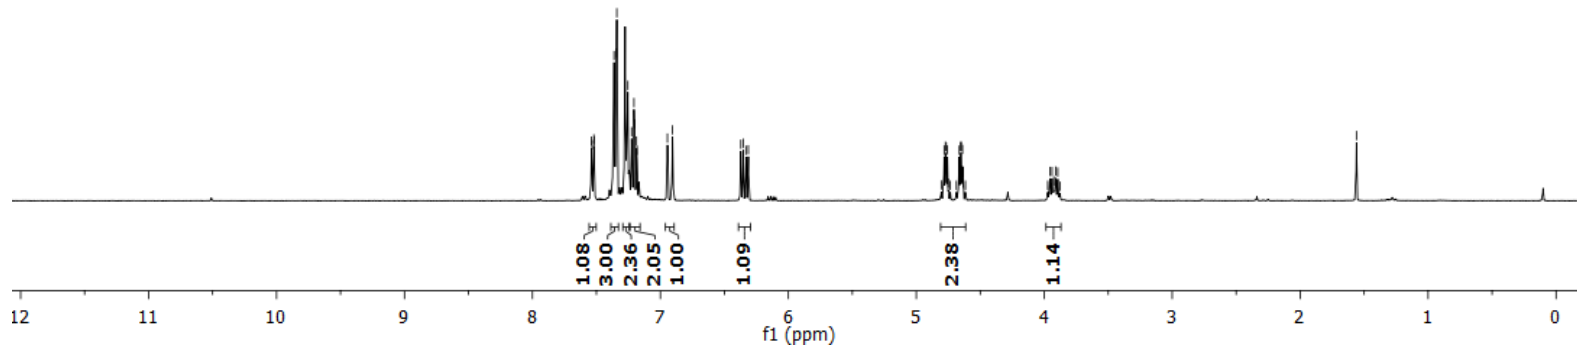

<sup>19</sup>F NMR (376 MHz, CDCl<sub>3</sub>) of 4e

FLUORINE\_01  
STANDARD FLUORINE PARAMETERS

-218.03  
-218.08  
-218.15  
-218.20  
-218.28  
-218.33

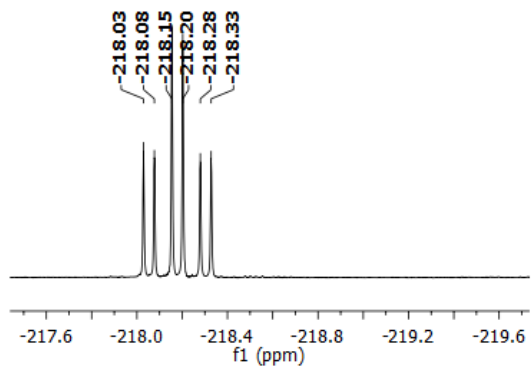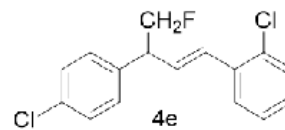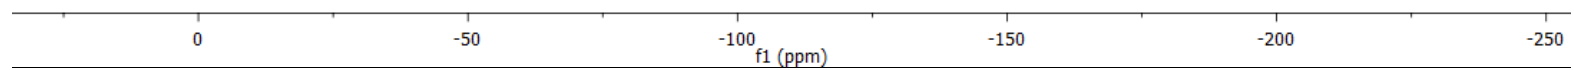

CARBON\_01  
06-12-112-h

$^{13}\text{C}$  NMR (100 MHz,  $\text{CDCl}_3$ ) of 4e

137.97  
137.94  
134.98  
133.12  
133.05  
130.62  
130.57  
129.71  
129.48  
128.95  
128.72  
126.84

86.30  
84.55

48.94  
48.74

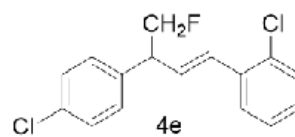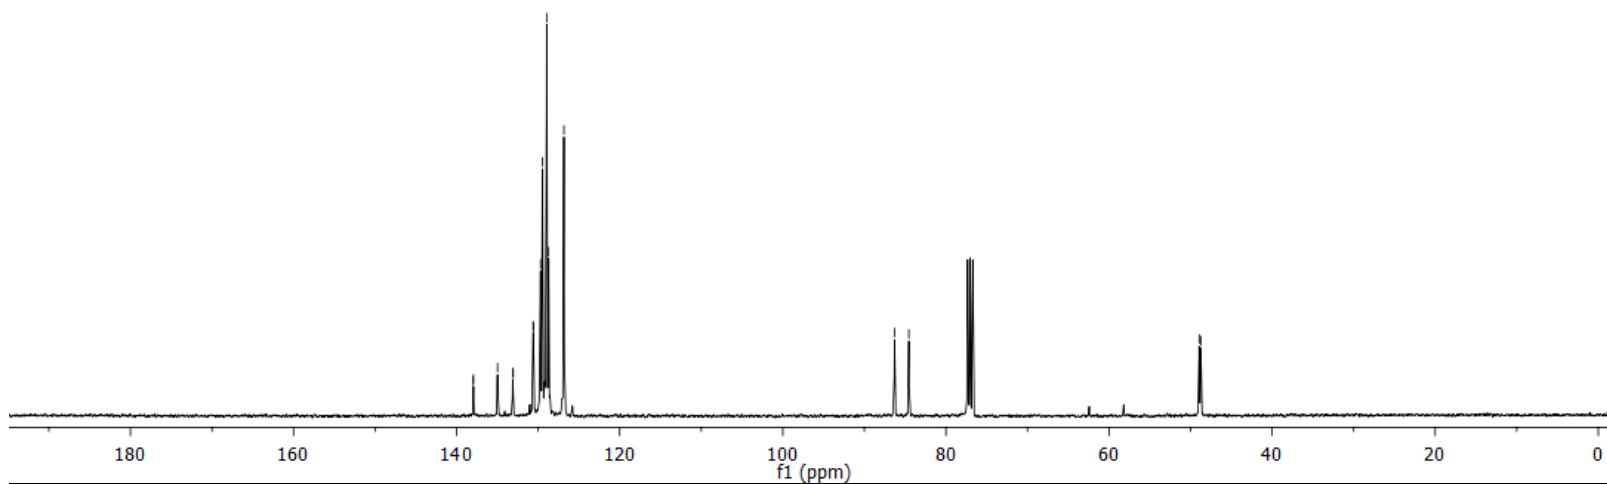

<sup>1</sup>H NMR (400 MHz, CDCl<sub>3</sub>) of 4f

PROTON\_01  
06-12-112-L

6.47  
6.42  
6.40  
6.38  
6.36  
6.34  
4.75  
4.73  
4.63  
4.61  
3.91  
3.90  
3.88  
3.87  
3.85  
3.84  
-1.56

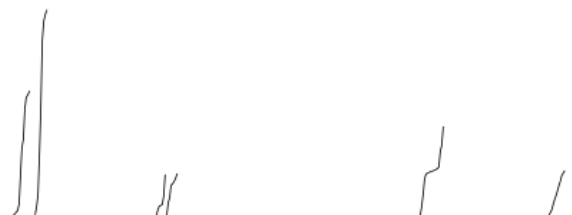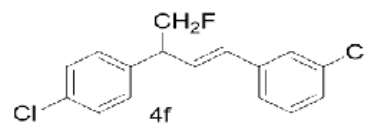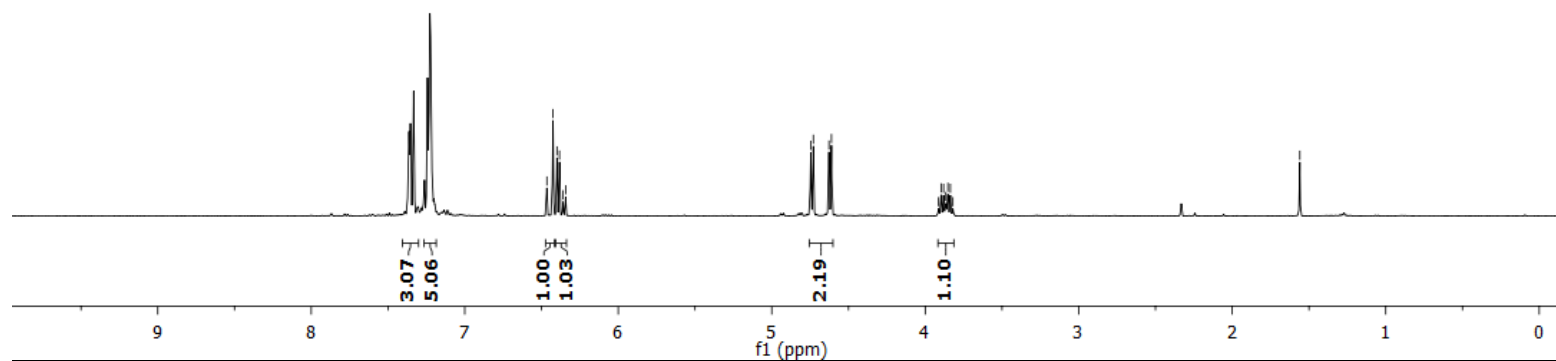

<sup>19</sup>F NMR (376 MHz, CDCl<sub>3</sub>) of 4f

FLUORINE\_01  
STANDARD FLUORINE PARAMETERS

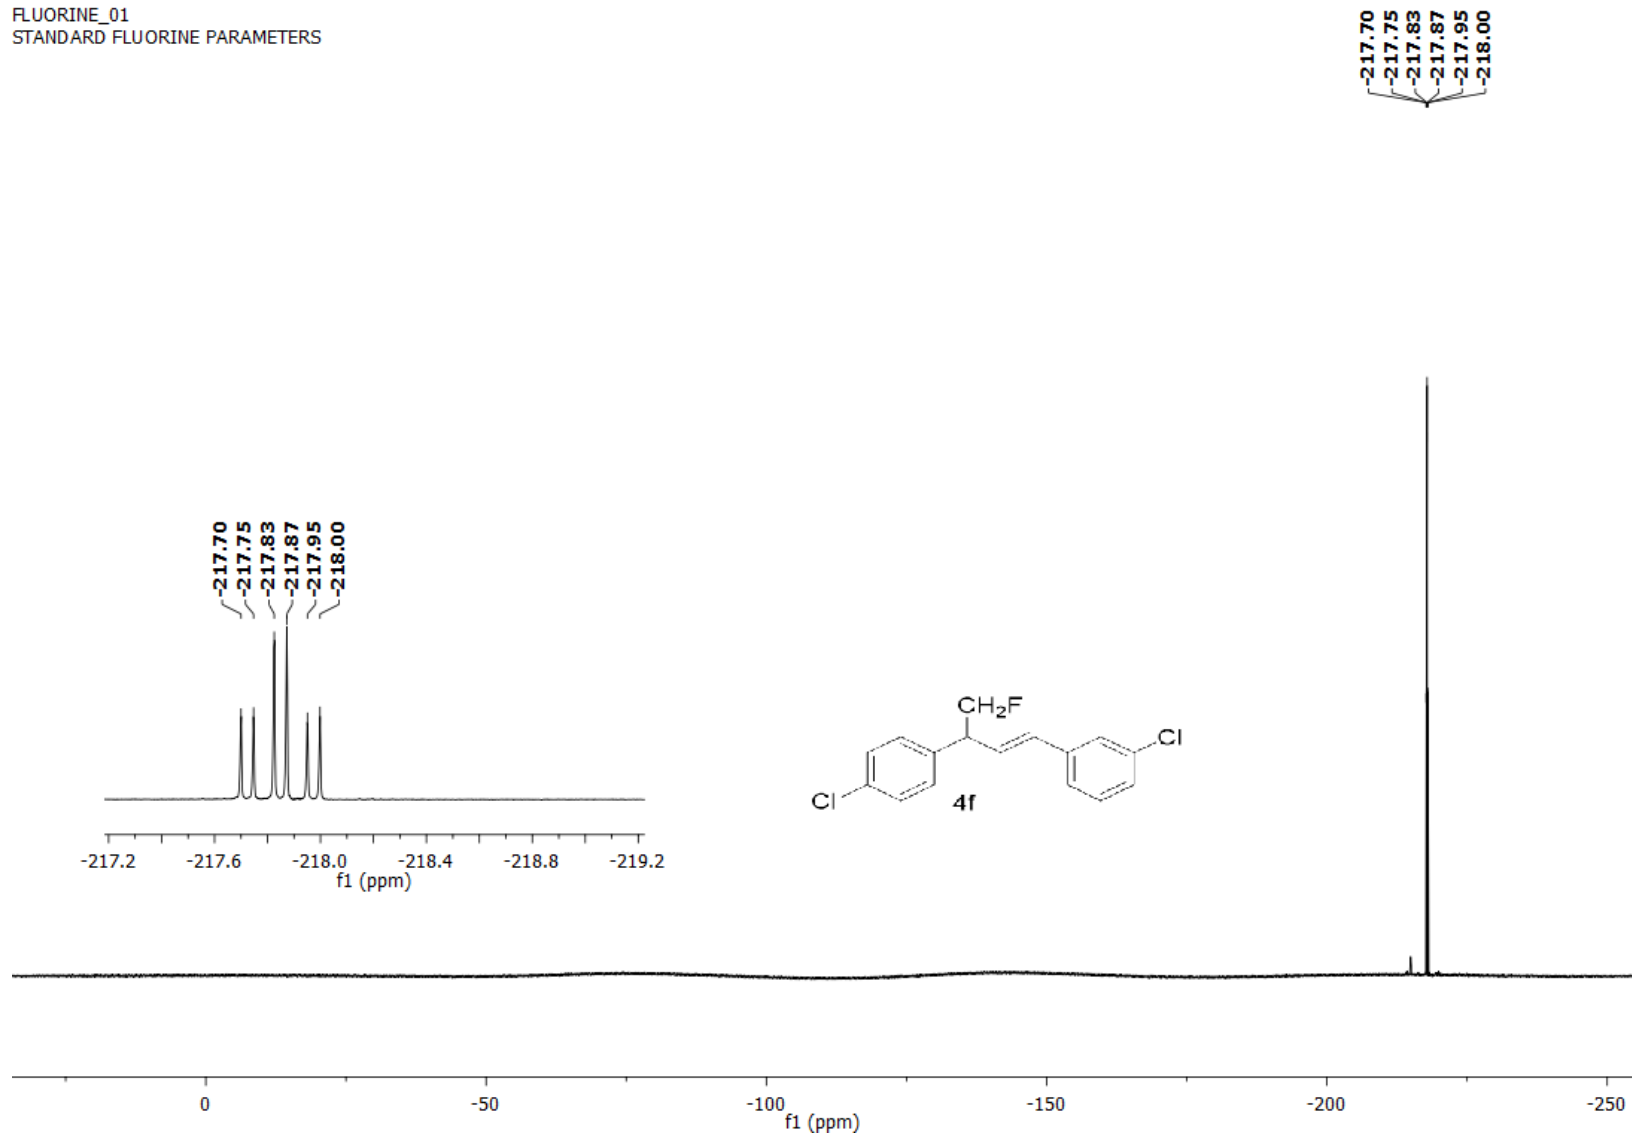

<sup>13</sup>C NMR (100 MHz, CDCl<sub>3</sub>) of 4f

CARBON\_01  
06-12-112-L

138.62  
137.81  
137.76  
134.57  
133.16  
131.32  
129.78  
129.46  
129.40  
129.35  
128.97  
127.63  
126.21  
124.58

86.19  
84.44

48.72  
48.53

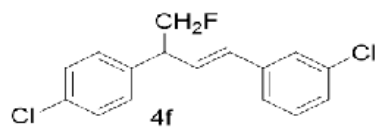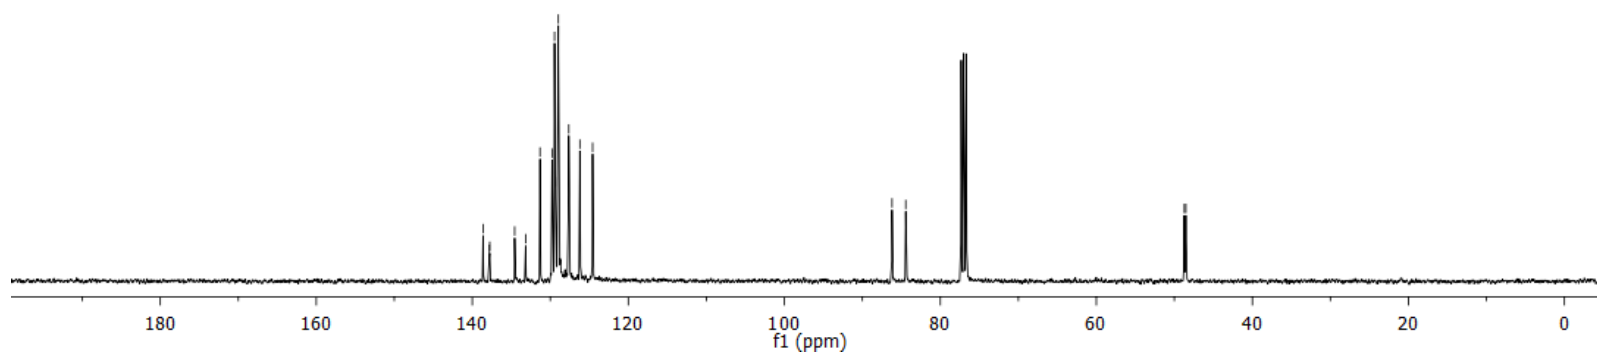



PROTON\_01  
06-11-112-c

<sup>1</sup>H NMR (400 MHz, CDCl<sub>3</sub>) of 4g

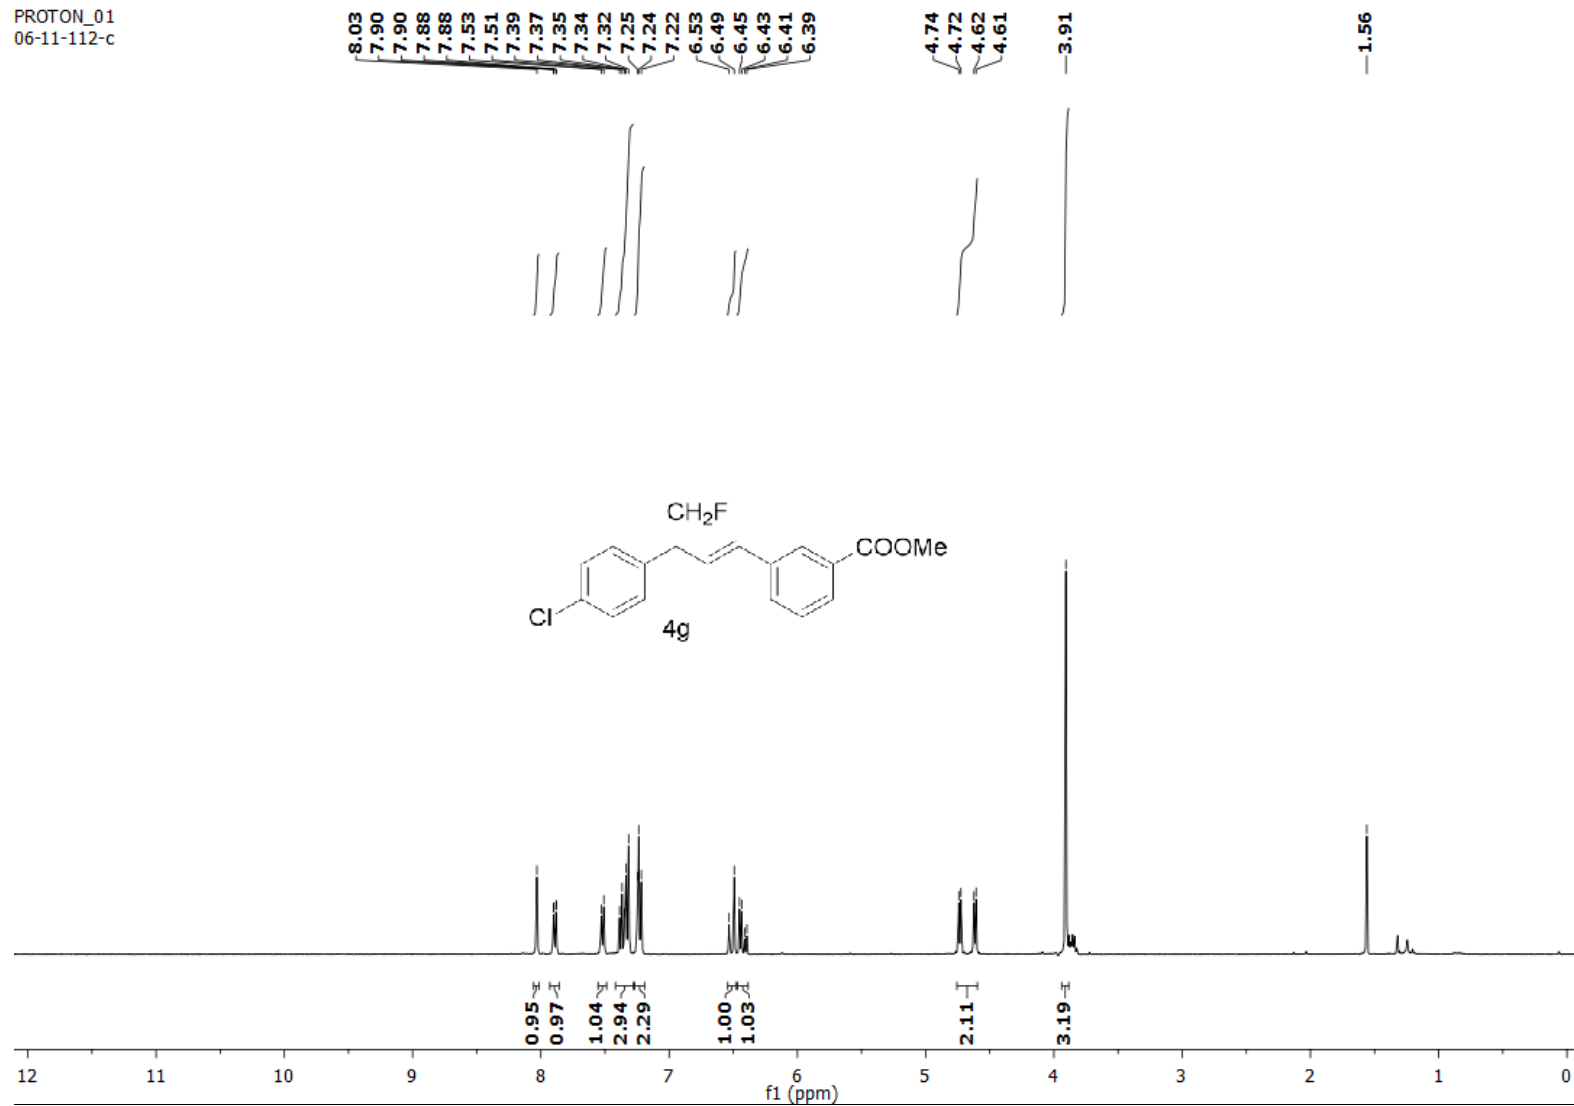

<sup>19</sup>F NMR (376 MHz, CDCl<sub>3</sub>) of 4g

FLUORINE\_01  
STANDARD FLUORINE PARAMETERS

-217.83  
-217.87  
-217.95  
-218.00  
-218.08  
-218.12

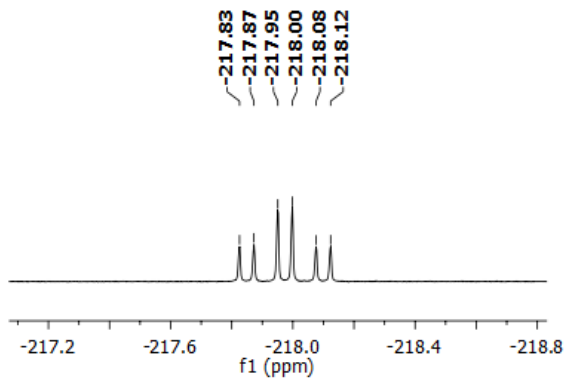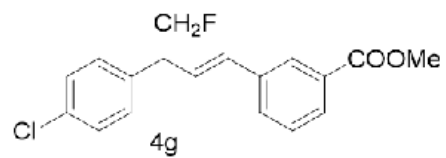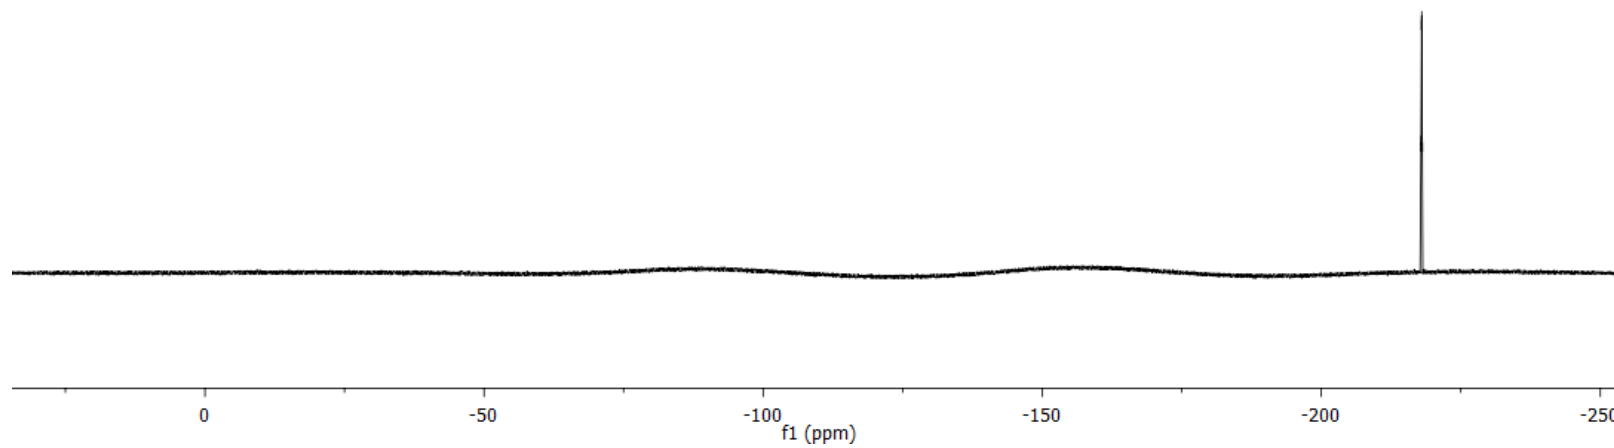

<sup>13</sup>C NMR (100 MHz, CDCl<sub>3</sub>) of 4g

CARBON\_01  
06-11-112-c1

— 166.86

137.83  
137.05  
133.11  
131.64  
130.64  
130.53  
129.43  
129.11  
128.91  
128.61  
127.24

86.18  
84.43

52.08  
48.74  
48.54

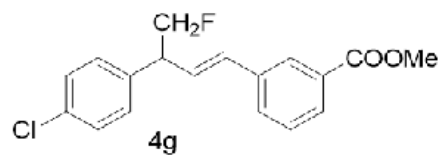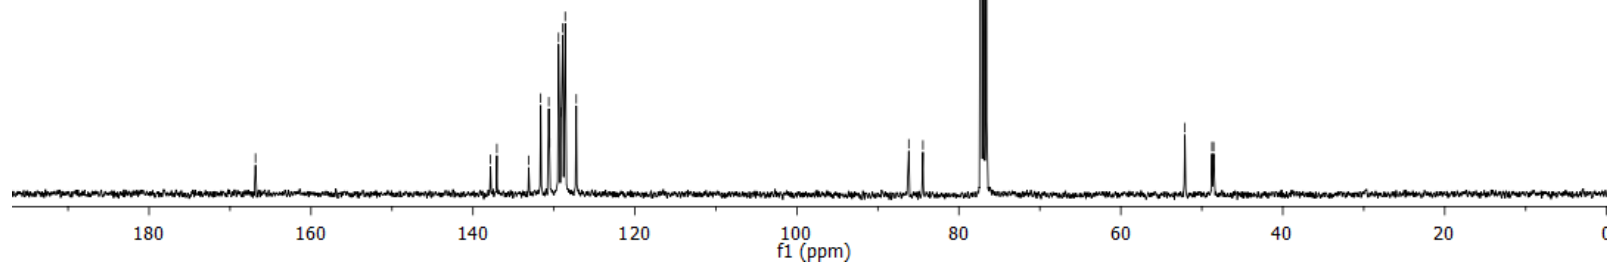

PROTON\_01  
06-14-113-f

<sup>1</sup>H NMR (400 MHz, CDCl<sub>3</sub>) of 4h

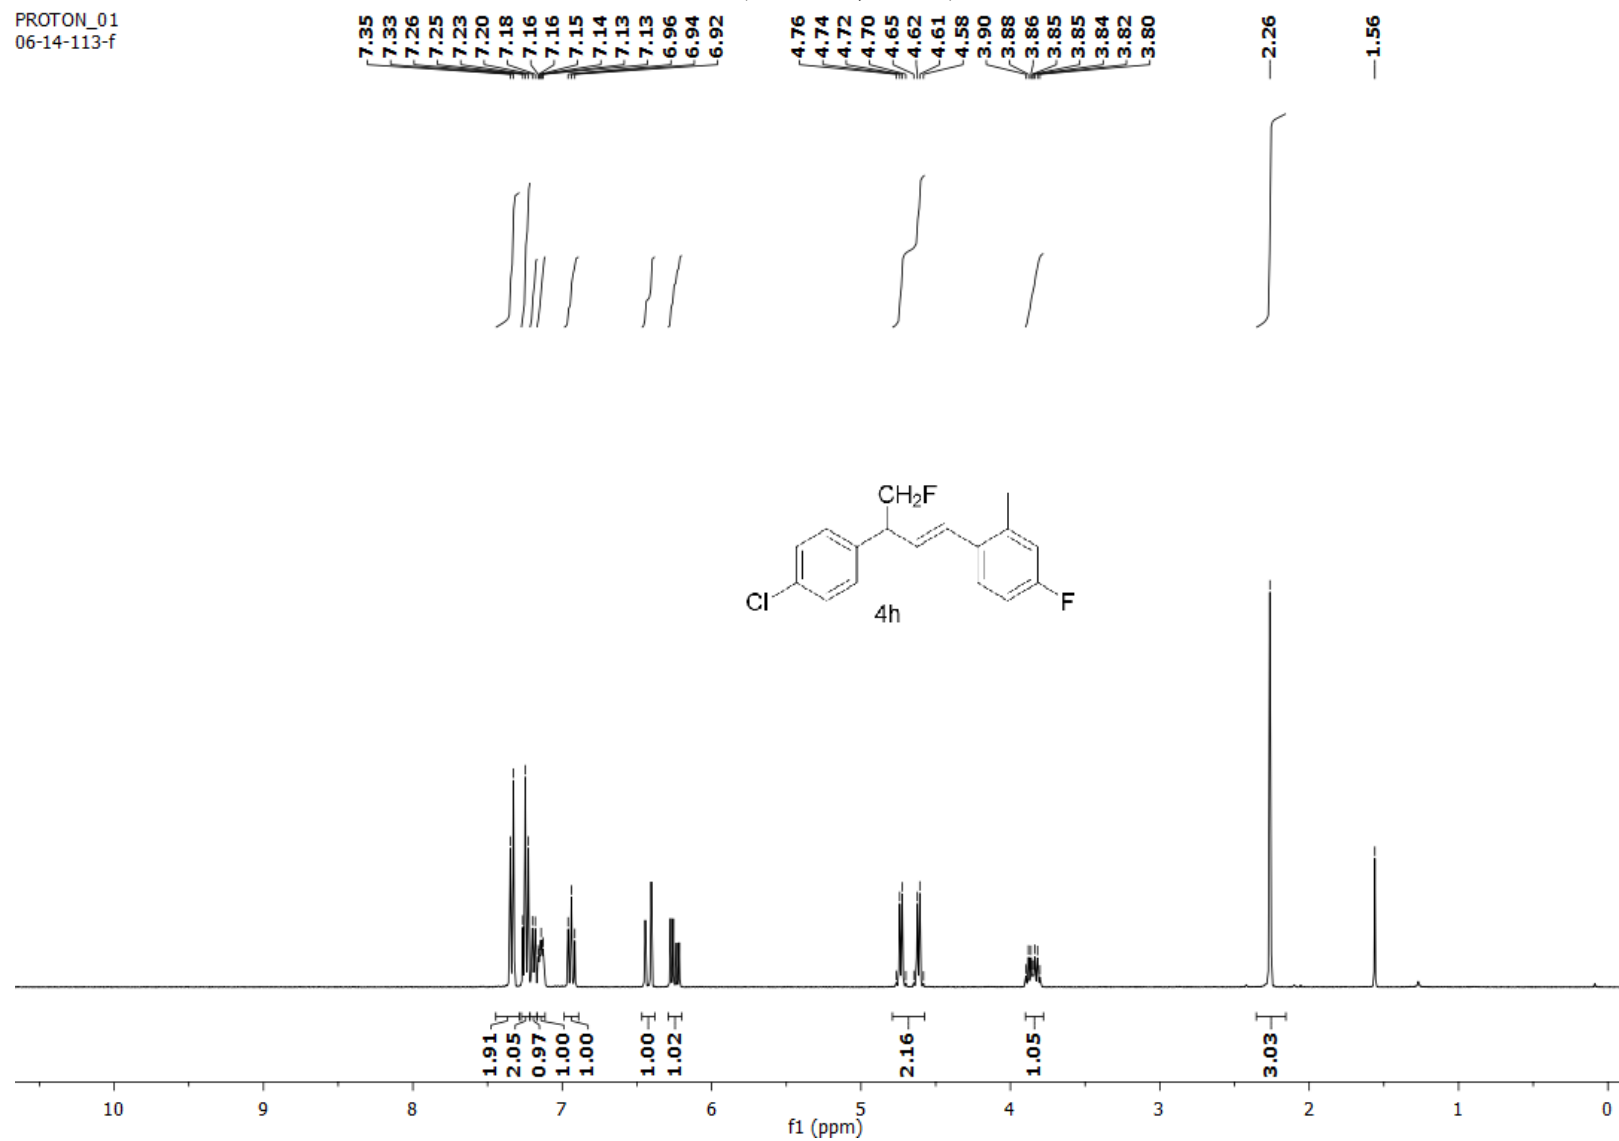

<sup>19</sup>F NMR (376 MHz, CDCl<sub>3</sub>) of 4h

FLUORINE\_01  
STANDARD FLUORINE PARAMETERS

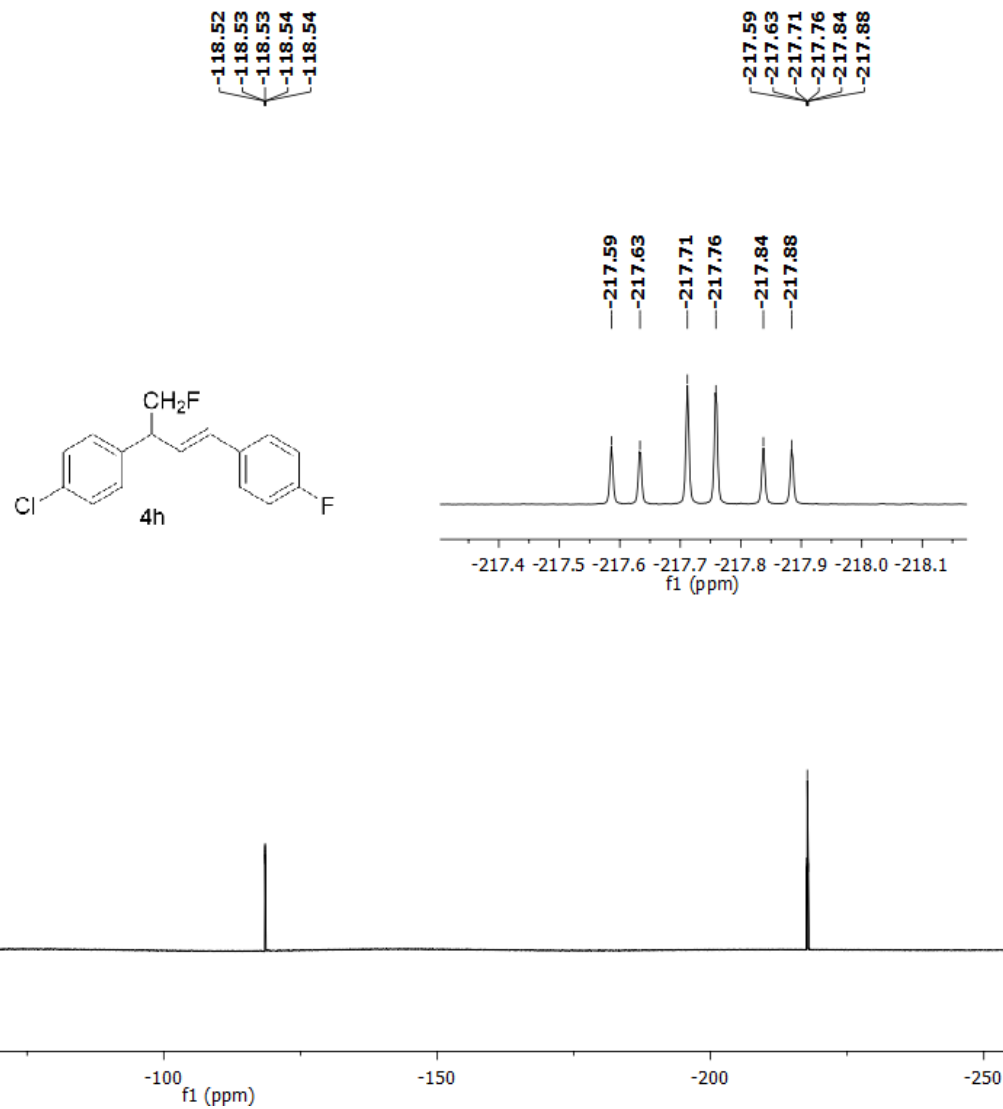

<sup>13</sup>C NMR (100 MHz, CDCl<sub>3</sub>) of 4h

CARBON\_01  
06-14-113-f

162.17  
159.72  
138.18  
138.14  
133.01  
132.58  
132.55  
131.61  
129.46  
129.28  
129.23  
128.90  
127.10  
127.06  
125.25  
125.17  
124.99  
124.82  
115.21  
114.98

86.37  
84.62

48.73  
48.53

14.55  
14.52

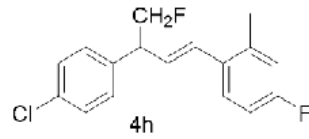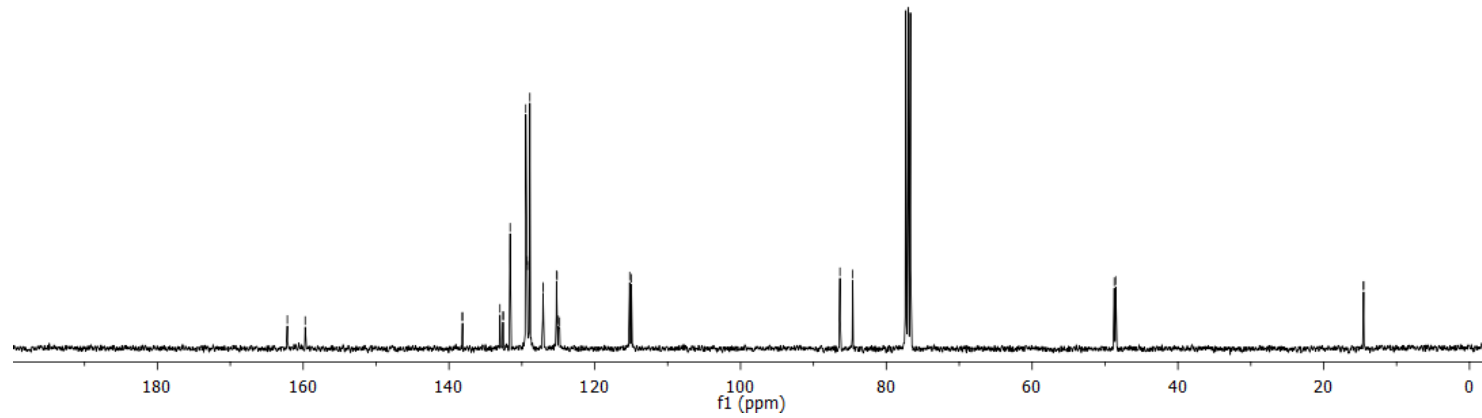

<sup>1</sup>H NMR (400 MHz, CDCl<sub>3</sub>) of 4i

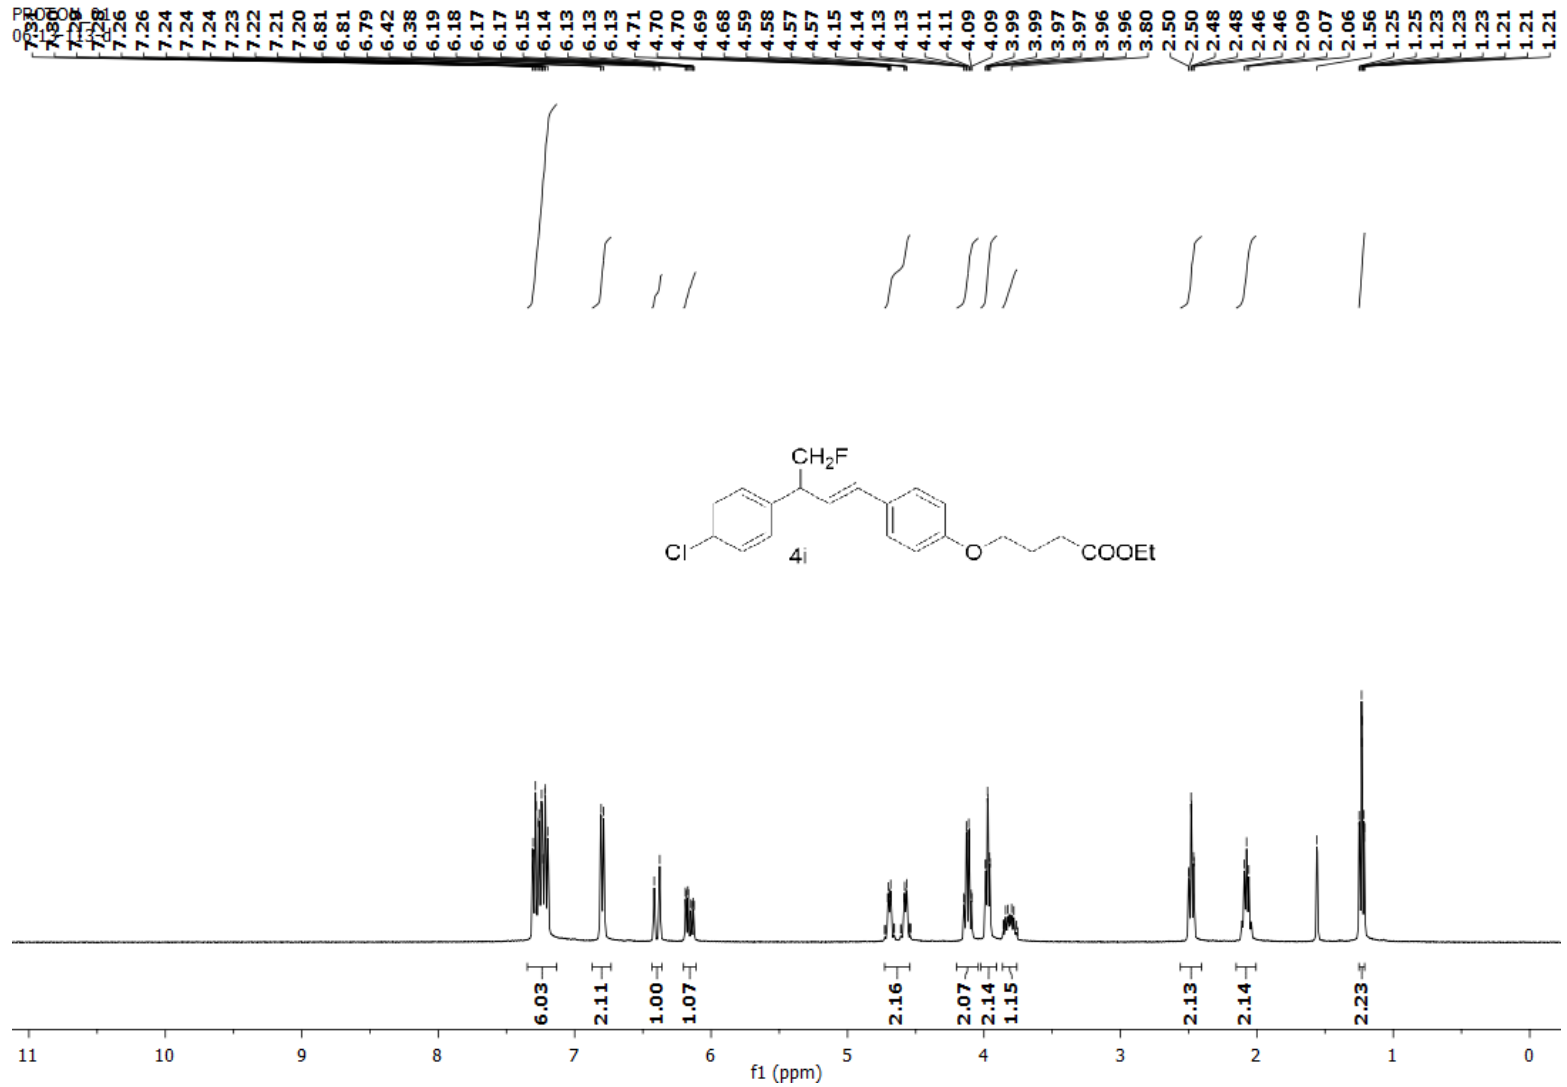

**<sup>19</sup>F NMR (376 MHz, CDCl<sub>3</sub>) of 4i**

FLUORINE\_01  
STANDARD FLUORINE PARAMETERS

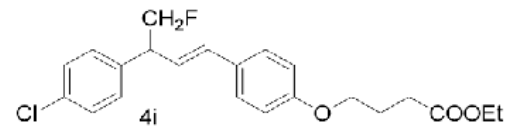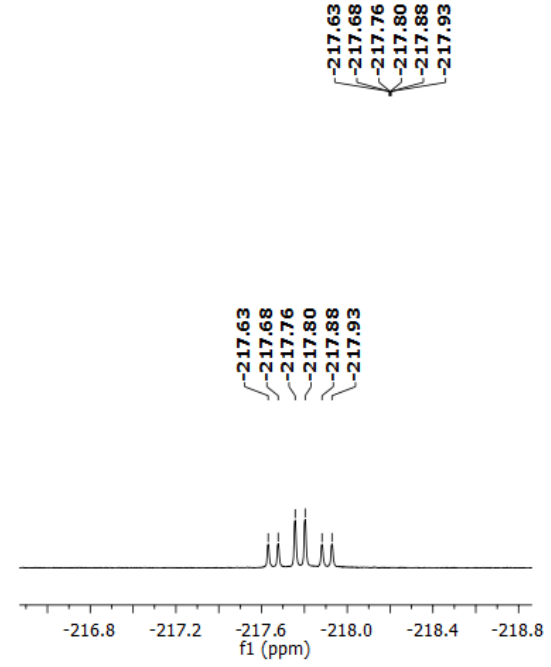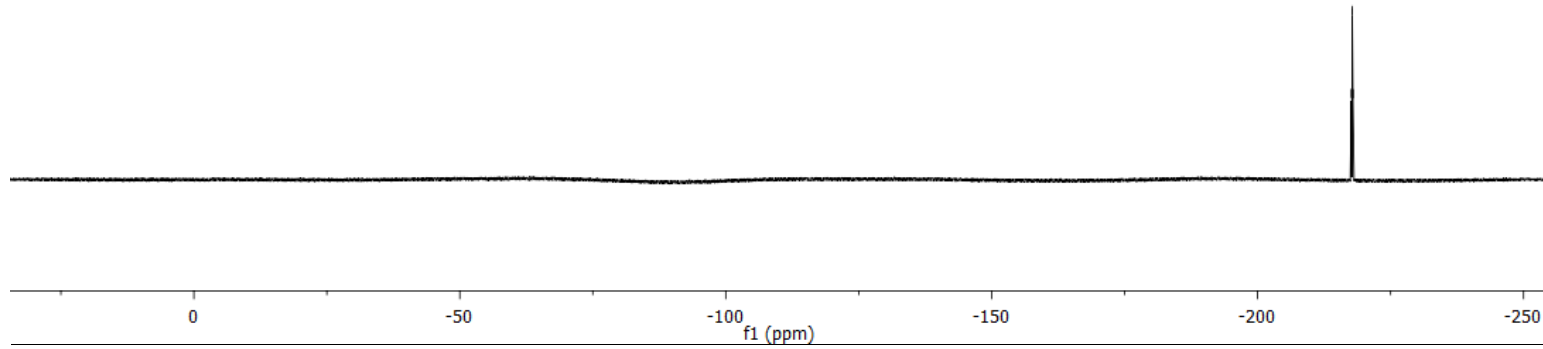



<sup>13</sup>C NMR (100 MHz, CDCl<sub>3</sub>) of 4i

CARBON\_01  
06-13-113-d

—172.97  
—158.34  
138.23  
132.68  
131.78  
129.36  
129.26  
128.63  
127.25  
125.19  
125.13  
—114.35  
86.27  
84.53  
—66.57  
—60.24  
48.55  
48.35  
—30.57  
—24.41  
—14.02

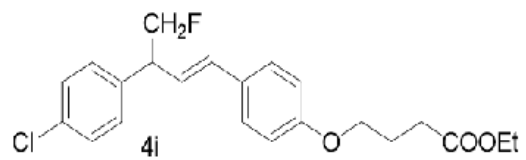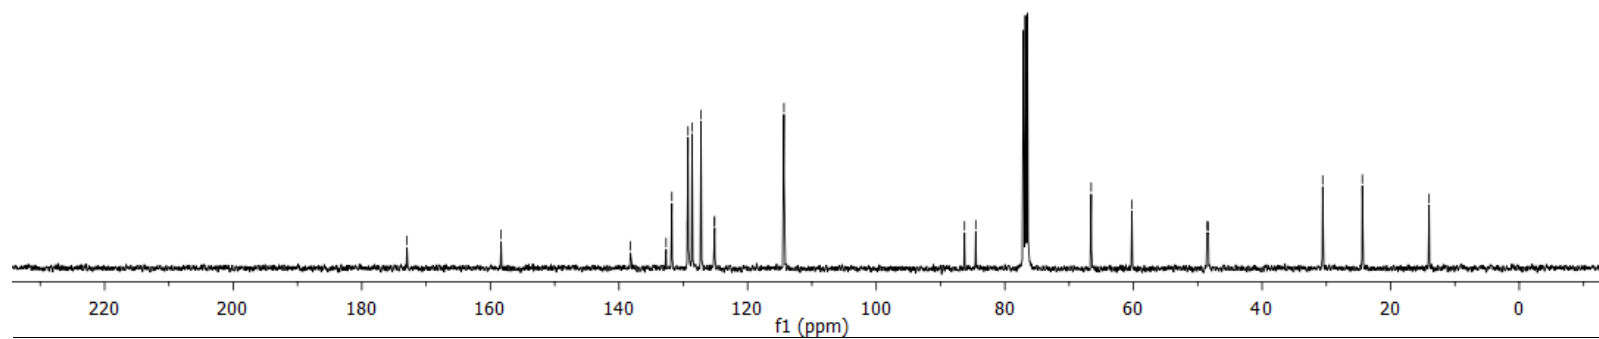

<sup>1</sup>H NMR (400 MHz, CDCl<sub>3</sub>) of 4j

PROTON\_01  
06-12-113-c

7.36 7.34 7.27 7.25 7.23 7.17 7.15 6.97 6.96 6.95 6.94 6.63 6.59 6.23 6.21 6.19 6.17 4.76 4.73 4.72 4.69 4.64 4.62 4.60 4.58 3.87 3.86 3.84 3.83 3.81 3.80 —1.56

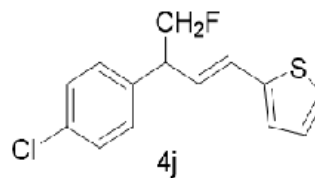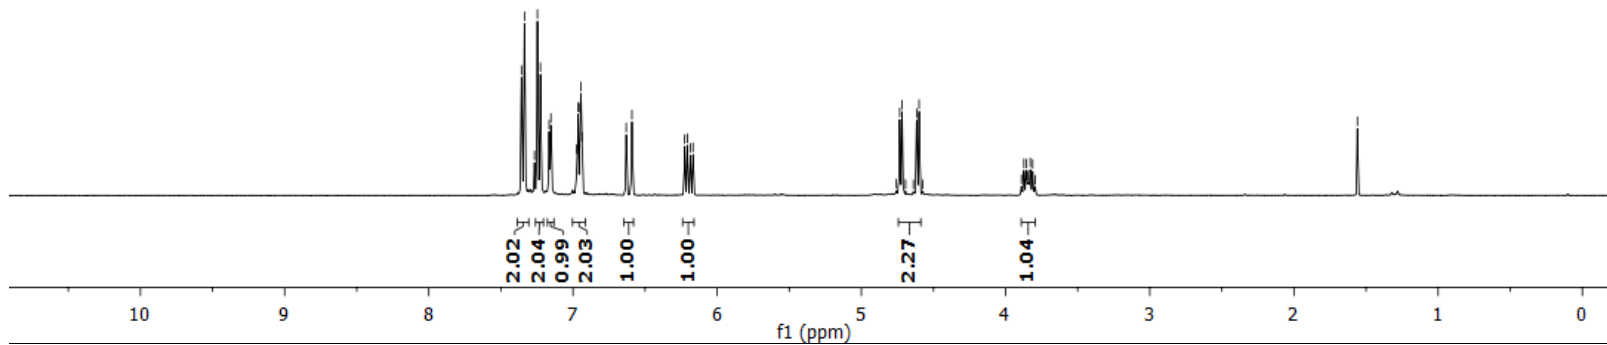

FLUORINE\_01  
STANDARD FLUORINE PARAMETERS

$^{19}\text{F}$  NMR (376 MHz,  $\text{CDCl}_3$ ) of 4j

-217.43  
-217.48  
-217.56  
-217.61  
-217.69  
-217.73

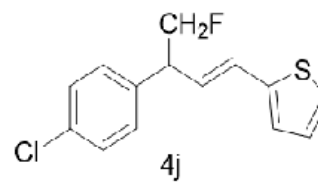

-217.43  
-217.48  
-217.56  
-217.61  
-217.69  
-217.73

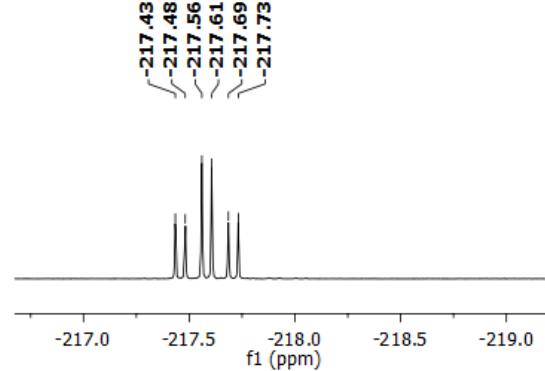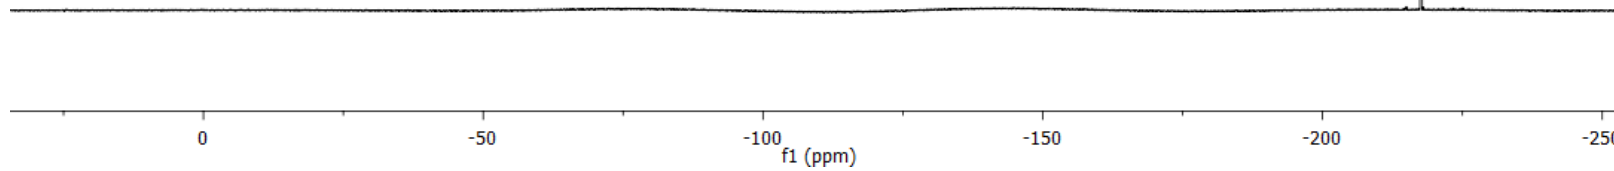

<sup>13</sup>C NMR (100 MHz, CDCl<sub>3</sub>) of 4j

CARBON\_01  
06-12-113-c

141.78  
137.88  
137.84  
133.04  
129.47  
128.88  
127.31  
127.26  
127.20  
125.79  
125.69  
124.22

86.17  
84.41

48.56  
48.36

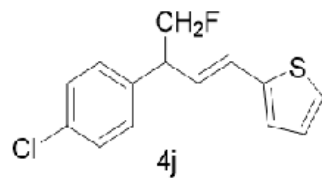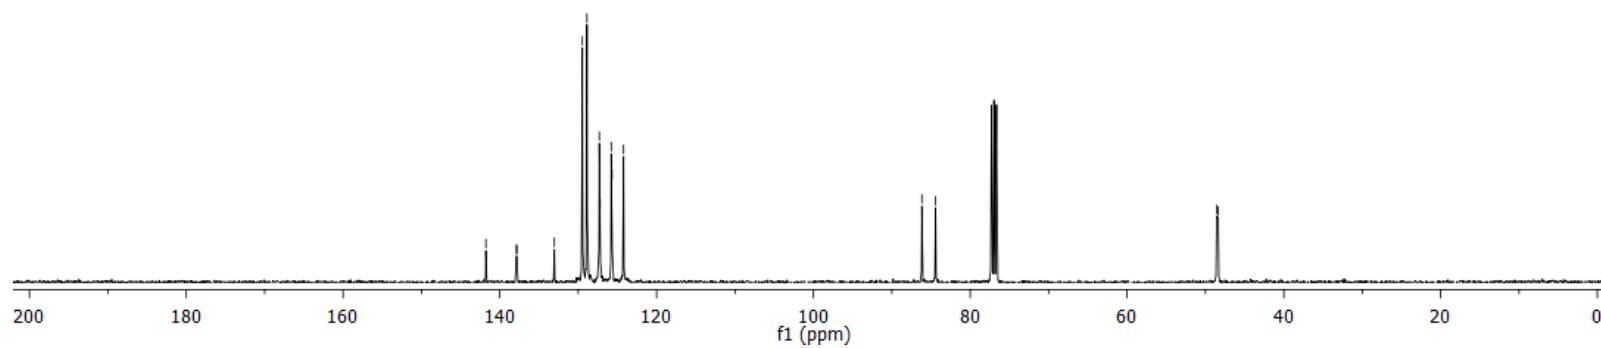

## 8. References

- [1] M. C. Pacheco, V. Gouverneur, *Org. Lett.* **2005**, *7*, 1267-1270.
- [2] A. He, J. R. Falck, *J. Am. Chem. Soc.* **2010**, *132*, 2524-2525.
- [3] H. Dang, M. Mailig, G. Lalic, *Angew. Chem. Int. Ed.* **2014**, *53*, 6473-6476.
- [4] K. Hong, X. Liu, J. P. Morken, *J. Am. Chem. Soc.* **2014**, *136*, 10581-10584.
- [5] C. Qi, Y. Peng, L. Ouyang, Y. Ren, H. Jiang, *Adv. Synth. Catal.* **2017**, *359*, 1339-1350.
- [6] Y. Amako, S. Arai, A. Nishida, *Org. Biomol. Chem.* **2017**, *15*, 1612-1617.
- [7] F. J. Sarabia, E. M. Ferreira, *Org. Lett.* **2017**, *19*, 2865-2868.
- [8] H. Zhu, W. Jin, J. He, Y. Zhang, G. Zhu, *Adv. Synth. Catal.* **2016**, *358*, 3730-3735.
- [9] K. Takami, H. Yorimitsu, K. Oshima, *Org. Lett.* **2004**, *6*, 4555-4558.
- [10] G. Wu, Y. Deng, C. Wu, Y. Zhang, J. Wang, *Angew. Chem. Int. Ed.* **2014**, *53*, 10510-10514.
